# Supplementary material for: Highly similar genomic landscapes in monoclonal B-cell lymphocytosis and ultra-stable chronic lymphocytic leukemia with low frequency of driver mutations
Source: PubMed Central journal article supplement — Haematologica. 2018 Feb 15;103(5):865–73. doi: 10.3324/haematol.2017.177212 (PMC5927998; doi:10.3324/haematol.2017.177212), 2018-05

## Highly similar genomic landscapes in monoclonal B-cell lymphocytosis and ultra-stable chronic lymphocytic leukemia with low frequency of driver mutations

Andreas Agathangelidis,<sup>1\*</sup> Viktor Ljungström,<sup>2\*</sup> Lydia Scarfò,<sup>1</sup> Claudia Fazi,<sup>1</sup> Maria Gounari,<sup>1,3</sup> Tatjana Pandzic,<sup>2</sup> Lesley-Ann Sutton,<sup>2,4</sup> Kostas Stamatopoulos,<sup>3</sup> Giovanni Tonon,<sup>5</sup> Richard Rosenquist<sup>2,4\*\*</sup> and Paolo Ghia<sup>1\*\*</sup>

<sup>1</sup>Strategic Research Program on CLL and B-cell Neoplasia Unit, Division of Experimental Oncology, Università Vita-Salute San Raffaele and IRCCS Istituto Scientifico San Raffaele, Milan, Italy; <sup>2</sup>Department of Immunology, Genetics and Pathology, Science for Life Laboratory, Uppsala University, Sweden; <sup>3</sup>Institute of Applied Biosciences, Center for Research and Technology Hellas, Thessaloniki, Greece; <sup>4</sup>Department of Molecular Medicine and Surgery, Karolinska Institutet, Stockholm, Sweden and <sup>5</sup>Functional Genomics of Cancer Unit, Division of Experimental Oncology, IRCCS Istituto Scientifico San Raffaele, Milan, Italy

*\*AA and VL contributed equally as first authors. \*\*RR and PG contributed equally as last authors*

©2018 Ferrata Storti Foundation. This is an open-access paper. doi:10.3324/haematol.2017.177212

Received: August 8, 2017.

Accepted: February 7, 2018.

Pre-published: February 15, 2018.

Correspondence: [ghia.paolo@hsr.it](mailto:ghia.paolo@hsr.it)

---

## **Supplementary material**

### **Study population**

The study cohort comprised 9 individuals with LC-MBL, 13 individuals with HC-MBL, and 7 patients with Rai stage 0 CLL, herein called 'ultra-stable' CLL. All CLL patients were monitored for at least 10 years (median, 16); the median follow-up period for the LC-MBL and HC-MBL cases was 10 and 7 years, respectively. CLL patients were diagnosed according to the iwCLL guidelines(1), while the detection of MBL was based on established criteria(2). Patients with CLL were selected based on the absence of any symptoms of disease progression during the monitoring period, whereas individuals with MBL (both LC and HC) were chosen based on the presence of a stable CD19+CD5+ monoclonal population after examination at different timepoints during the follow-up period.

### **Whole-genome sequencing: bioinformatics analysis**

Sequencing reads were aligned to the hg19 reference genome using BWA (v0.7.12) and optical or PCR duplicate reads were marked using Picard (v1.96). BAM-files were locally realigned around small insertions and deletions (indels) using GATK (v3.2.4). Single nucleotide variants (SNV) and indels were identified with FreeBayes (0.9.21-7). A variant allele frequency (VAF) of 10% was used as threshold for variant calling. Subsequent filtering was performed to remove variants located in low complexity regions and potential sequencing artifacts present in at least 10% of the reads in a panel of normal samples. Somatic copy-number alterations (sCNA) were analyzed with Control-FREEC(3). For the pre-telomeric and pre-centromeric repetitive regions, a 50kbp detection cut-off was applied to filter out false positive sCNA due to incorrect genome mapping/assembly.

Analysis of the mutational spectra was performed using the MutationalPatterns package(4). The contribution of different mutational signatures in each sample was estimated using non-negative matrix factorization and signatures were extracted based on the cophenetic correlation coefficient. Hierarchical clustering was performed with cosine similarity as distance measure.

NCV were analyzed and prioritized with Funseq2(5). Output data were filtered based on the following criteria: (i) Variants should be identified within regulatory elements that affect the expression of target genes

and represent transcription factor (TF) highly occupied regions (“HOT”). The linkage between NCVs and target genes was based on the Roadmap Epigenomics Project, where, data for both the activity signals and gene expression from bisulfite sequencing, ChIP-Seq, and RNA-Seq were analysed. For each candidate target, the correlations of their activity/inactivity and expression levels across the different tissue types were computed. (ii) Variant hits should be recurrent (i.e. the exact change at the exact gene position) and, thus, included multiple times within the COSMIC and the Funseq2 database that contains mutations from 570 samples of 10 tumor types, among which 28 are CLL samples), and (iii) target genes should be network hubs.

Fishhook(6) was used for unbiased NCV prioritization. Briefly, the genome was divided into 10kb windows with 500bp spacing. Positions with low-complexity, low-mappability were masked from the analysis as described by *Li et al.*(7). The tool calculates the neutral somatic density using Gamma-Posion regression and outputs regions across the sample set with significantly increased mutation rate.

### **Targeted re-sequencing: bioinformatics analysis**

Agilent SurecallTrimmer (v3.5.1.46) was used to remove adaptor sequences, mask HaloPlex enzyme footprints, and trim low quality bases. The processed reads were aligned to the hg19 human reference genome using BWA (v.0.7.12). Duplicate reads were marked using the Agilent LocatIt tool (v3.5.1.46). Variants were called using a VAF cutoff of 1% and a minimum of 30 variant reads. Variants had to meet the following conditions to be included in downstream analysis: (i) be located within an exonic or splicing region; (ii) be non-synonymous; and (iii) not be listed in the European 1000 genomes variant database.

## References

1. Hallek M, Cheson BD, Catovsky D, et al. Guidelines for the diagnosis and treatment of chronic lymphocytic leukemia: a report from the International Workshop on Chronic Lymphocytic Leukemia updating the National Cancer Institute-Working Group 1996 guidelines. *Blood*. 2008;111(12):5446-56.
2. Marti GE, Rawstron AC, Ghia P, et al. Diagnostic criteria for monoclonal B-cell lymphocytosis. *Br J Haematol*. 2005;130(3):325-32.
3. Boeva V, Popova T, Bleakley K, et al. Control-FREEC: a tool for assessing copy number and allelic content using next-generation sequencing data. *Bioinformatics*. 2012;28(3):423-5.
4. Blokzijl FJ, R.; van Boxtel, R.; Cuppen, E. MutationalPatterns: comprehensive genome-wide analysis of mutational processes. *bioRxiv*. 2016.
5. Fu Y, Liu Z, Lou S, et al. FunSeq2: a framework for prioritizing noncoding regulatory variants in cancer. *Genome Biol*. 2014;15(10):480.
6. Imielinski M, Guo G, Meyerson M. Insertions and Deletions Target Lineage-Defining Genes in Human Cancers. *Cell*. 2017;168(3):460-72 e14.
7. Li H. Toward better understanding of artifacts in variant calling from high-coverage samples. *Bioinformatics*. 2014;30(20):2843-51.

## Supplementary tables

**Table S1.** Details of the 11 CLL putative driver genes that were included in the targeted re-sequencing analysis.

| Gene          | RefSeq       | Coding exons | Transcript length |
|---------------|--------------|--------------|-------------------|
| <i>ATM</i>    | NM_000051    | 62           | 13147             |
| <i>BIRC3</i>  | NM_001165    | 8            | 4342              |
| <i>MYD88</i>  | NM_001172567 | 5            | 2871              |
| <i>NOTCH1</i> | NM_017617    | 34*          | 9374              |
| <i>SF3B1</i>  | NM_012433    | 25*          | 6526              |
| <i>TP53</i>   | NM_000546    | 10           | 2579              |
| <i>EGR2</i>   | NM_000399    | 2            | 2968              |
| <i>POT1</i>   | NM_015450    | 15           | 4080              |
| <i>NFKBIE</i> | NM_004556    | 6            | 2581              |
| <i>XPO1</i>   | NM_003400    | 24*          | 4915              |
| <i>FBXW7</i>  | NM_033632    | 11           | 4976              |

\*Only the mutational hotspot regions of the following genes were sequenced: *NOTCH1* (exon 34), *SF3B1* (exons 14-16 and 18) and *XPO1* (exon 15). All coding exons in the remaining 8 genes were sequenced.

**Table S2.** Mean autosomal coverage of all samples in the present study.

| Sample ID           | Entity         | Mean Coverage |
|---------------------|----------------|---------------|
| CLL_1               | CLL            | 28            |
| CLL_2               | CLL            | 56            |
| CLL_3               | CLL            | 31            |
| CLL_4               | CLL            | 30            |
| CLL_5               | CLL            | 28            |
| HC-MBL_1            | HC-MBL         | 29            |
| HC-MBL_2            | HC-MBL         | 37            |
| HC-MBL_3            | HC-MBL         | 28            |
| HC-MBL_4            | HC-MBL         | 34            |
| HC-MBL_5            | HC-MBL         | 34            |
| LC-MBL_1            | LC-MBL         | 26            |
| LC-MBL_2            | LC-MBL         | 28            |
| LC-MBL_3            | LC-MBL         | 35            |
| LC-MBL_4            | LC-MBL         | 35            |
| LC-MBL_5            | LC-MBL         | 56            |
| LC-MBL_6            | LC-MBL         | 35            |
| <b>CLL_1-PMN</b>    | PMN            | 26            |
| <b>CLL_2-PMN</b>    | PMN            | 32            |
| <b>CLL_3-PMN</b>    | PMN            | 30            |
| <b>CLL_4-PMN</b>    | PMN            | 29            |
| <b>CLL_5-PMN</b>    | PMN            | 28            |
| <b>HC-MBL_1-PMN</b> | PMN            | 27            |
| <b>HC-MBL_2-PMN</b> | PMN            | 33            |
| <b>HC-MBL_3-PMN</b> | PMN            | 28            |
| <b>HC-MBL_4-PMN</b> | PMN            | 31            |
| <b>HC-MBL_5-PMN</b> | PMN            | 34            |
| <b>LC-MBL_1-PMN</b> | PMN            | 31            |
| <b>LC-MBL_2-PMN</b> | PMN            | 33            |
| <b>LC-MBL_3-PMN</b> | PMN            | 30            |
| <b>LC-MBL_4-PMN</b> | PMN            | 34            |
| <b>LC-MBL_5-PMN</b> | PMN            | 54            |
| <b>LC-MBL_6-PMN</b> | PMN            | 33            |
| <b>CLL_1-BUC</b>    | buccal control | 26            |
| <b>CLL_2-BUC</b>    | buccal control | 26            |
| <b>CLL_3-BUC</b>    | buccal control | 32            |
| <b>CLL_4-BUC</b>    | buccal control | 25            |
| <b>CLL_5-BUC</b>    | buccal control | 26            |
| <b>HC-MBL_1-BUC</b> | buccal control | 27            |
| <b>HC-MBL_2-BUC</b> | buccal control | 38            |
| <b>HC-MBL_3-BUC</b> | buccal control | 24            |
| <b>HC-MBL_4-BUC</b> | buccal control | 26            |
| <b>HC-MBL_5-BUC</b> | buccal control | 32            |
| <b>LC-MBL_1-BUC</b> | buccal control | 26            |
| <b>LC-MBL_2-BUC</b> | buccal control | 26            |

|                     |                |    |
|---------------------|----------------|----|
| <b>LC-MBL_3-BUC</b> | buccal control | 30 |
| <b>LC-MBL_4-BUC</b> | buccal control | 31 |
| <b>LC-MBL_5-BUC</b> | buccal control | 51 |
| <b>LC-MBL_6-BUC</b> | buccal control | 29 |

**Table S3.** Basic biological characteristics for the individuals and patients of the present cohort.

| Sample ID | Entity | Sex | Age | IGHV gene  | IGHV mut status | % of cell purity | % of B cells* | % of B cells with CLL immunophenotype** |
|-----------|--------|-----|-----|------------|-----------------|------------------|---------------|-----------------------------------------|
| CLL_1     | CLL    | F   | 85  | IGHV3-23   | MUT             | 98.2             | 89.0          | 97.0                                    |
| CLL_2     | CLL    | M   | 69  | IGHV4-38-2 | MUT             | 96.3             | 88.0          | 56.0                                    |
| CLL_3     | CLL    | F   | 83  | IGHV1-3    | MUT             | 95.9             | 95.0          | 100.0                                   |
| CLL_4     | CLL    | M   | 84  | IGHV3-30   | MUT             | 98.4             | 93.0          | 100.0                                   |
| CLL_5     | CLL    | F   | 47  | IGHV3-9    | MUT             | 97.3             | 97.0          | 97.0                                    |
| HC-MBL_1  | HC-MBL | M   | 66  | IGHV1-3    | MUT             | 96.6             | 53.0          | 93.0                                    |
| HC-MBL_2  | HC-MBL | M   | 77  | IGHV3-7    | MUT             | 97.6             | 41.0          | 81.0                                    |
| HC-MBL_3  | HC-MBL | M   | 77  | IGHV1-69   | MUT             | 96.4             | 67.0          | 61.0                                    |
| HC-MBL_4  | HC-MBL | M   | 83  | NA         | NA              | 98.1             | 77.0          | 94.7                                    |
| HC-MBL_5  | HC-MBL | F   | 94  | IGHV3-15   | UNMUT           | 97.5             | 32.8          | 87.6                                    |
| LC-MBL_1  | LC-MBL | M   | 68  | IGHV4-31   | MUT             | 96.3             | 7.3           | 10.7                                    |
| LC-MBL_2  | LC-MBL | F   | 68  | IGHV3-7    | MUT             | 97.2             | 10.8          | 7.1                                     |
| LC-MBL_3  | LC-MBL | M   | 71  | IGHV1-8    | MUT             | 98.8             | 5.5           | 70.5                                    |
| LC-MBL_4  | LC-MBL | M   | 70  | IGHV1-8    | MUT             | 96.3             | 13.0          | 16.8                                    |
| LC-MBL_5  | LC-MBL | M   | 59  | IGHV5-51   | MUT             | 96.4             | 40.0          | 93.0                                    |
| LC-MBL_6  | LC-MBL | F   | 76  | IGHV2-5    | MUT             | 95.3             | 60.0          | 90.0                                    |

\* % of B cells within the entire lymphocyte population

\*\* % of CLL B cells within the entire B cell population



**Table S4.** Ninety-six substitution mutation classification for CLL, HC-MBL, LC-MBL and PMN samples.

| Mutation Type | Motif | CLL     | HC-MBL  | LC-MBL  | PMN     |
|---------------|-------|---------|---------|---------|---------|
| C>A           | A.A   | 1,28192 | 1,19265 | 1,38240 | 1,43129 |
| C>A           | A.C   | 0,99814 | 1,10559 | 1,02965 | 0,50890 |
| C>A           | A.G   | 0,28378 | 0,18281 | 0,22881 | 0,28625 |
| C>A           | A.T   | 1,02749 | 1,02724 | 1,01058 | 0,95419 |
| C>A           | C.A   | 1,45806 | 1,21876 | 1,41100 | 1,36768 |
| C>A           | C.C   | 0,81221 | 0,64420 | 0,65783 | 0,95419 |
| C>A           | C.G   | 0,12721 | 0,13058 | 0,19067 | 0,15903 |
| C>A           | C.T   | 1,12535 | 1,07077 | 1,02011 | 1,14503 |
| C>A           | G.A   | 1,04706 | 1,20135 | 1,11545 | 1,04961 |
| C>A           | G.C   | 0,68499 | 0,54844 | 0,81990 | 0,63613 |
| C>A           | G.G   | 0,15657 | 0,10446 | 0,14300 | 0,31806 |
| C>A           | G.T   | 0,91985 | 0,88796 | 1,10592 | 0,66793 |
| C>A           | T.A   | 1,50699 | 1,19265 | 1,39193 | 2,03562 |
| C>A           | T.C   | 0,75349 | 0,67032 | 0,87710 | 0,57251 |
| C>A           | T.G   | 0,09785 | 0,15669 | 0,22881 | 0,15903 |
| C>A           | T.T   | 1,73206 | 1,70627 | 2,04023 | 1,94020 |
| C>G           | A.A   | 0,56757 | 0,68773 | 0,63876 | 0,79516 |
| C>G           | A.C   | 0,42078 | 0,45268 | 0,51482 | 0,44529 |
| C>G           | A.G   | 0,11742 | 0,08705 | 0,06673 | 0,09541 |
| C>G           | A.T   | 0,76328 | 0,56585 | 0,58156 | 0,73155 |
| C>G           | C.A   | 0,34249 | 0,36563 | 0,34321 | 0,73155 |
| C>G           | C.C   | 0,36207 | 0,33080 | 0,30508 | 0,28625 |
| C>G           | C.G   | 0,09785 | 0,06093 | 0,04766 | 0,28625 |
| C>G           | C.T   | 0,51864 | 0,40915 | 0,62923 | 0,47709 |
| C>G           | G.A   | 0,25442 | 0,40045 | 0,40041 | 0,76335 |
| C>G           | G.C   | 0,51864 | 0,44398 | 0,43855 | 0,89058 |
| C>G           | G.G   | 0,10764 | 0,07834 | 0,08580 | 0,15903 |
| C>G           | G.T   | 0,83178 | 0,64420 | 0,65783 | 0,66793 |
| C>G           | T.A   | 0,38164 | 0,47880 | 0,46715 | 0,89058 |
| C>G           | T.C   | 0,53821 | 0,36563 | 0,48622 | 0,76335 |
| C>G           | T.G   | 0,05871 | 0,09576 | 0,08580 | 0,47709 |
| C>G           | T.T   | 0,80242 | 0,90537 | 0,86757 | 1,14503 |
| C>T           | A.A   | 1,97671 | 1,94132 | 1,91629 | 2,79898 |
| C>T           | A.C   | 1,26235 | 1,14041 | 1,30613 | 1,46310 |
| C>T           | A.G   | 3,83599 | 4,16993 | 3,38449 | 2,48091 |
| C>T           | A.T   | 1,45806 | 1,35805 | 1,52540 | 1,87659 |
| C>T           | C.A   | 1,55592 | 1,66274 | 1,47773 | 1,94020 |
| C>T           | C.C   | 1,56571 | 1,53216 | 1,75421 | 1,68575 |
| C>T           | C.G   | 2,47578 | 2,10672 | 2,06883 | 1,49491 |
| C>T           | C.T   | 1,88863 | 2,08931 | 2,11650 | 2,06743 |
| C>T           | G.A   | 1,48742 | 1,30582 | 1,25846 | 0,85877 |
| C>T           | G.C   | 1,82013 | 1,56698 | 1,46820 | 1,27226 |
| C>T           | G.G   | 3,07270 | 2,75093 | 2,35484 | 1,68575 |

|     |     |         |         |         |         |
|-----|-----|---------|---------|---------|---------|
| C>T | G.T | 2,23113 | 1,85427 | 1,76375 | 1,97201 |
| C>T | T.A | 1,40913 | 1,27970 | 1,49680 | 1,27226 |
| C>T | T.C | 1,63421 | 1,84556 | 1,52540 | 1,43129 |
| C>T | T.G | 1,38956 | 1,64533 | 1,44913 | 1,43129 |
| C>T | T.T | 1,61463 | 1,72368 | 1,75421 | 2,16284 |
| T>A | A.A | 1,01771 | 1,15783 | 1,28706 | 0,92239 |
| T>A | A.C | 0,65564 | 0,84443 | 0,82944 | 0,79516 |
| T>A | A.G | 0,99814 | 0,82702 | 0,72456 | 0,92239 |
| T>A | A.T | 1,40913 | 1,21876 | 1,29659 | 1,01781 |
| T>A | C.A | 0,46971 | 0,49621 | 0,75316 | 0,76335 |
| T>A | C.C | 0,72414 | 0,56585 | 0,67689 | 1,59033 |
| T>A | C.G | 0,54799 | 0,67032 | 0,83897 | 0,95419 |
| T>A | C.T | 0,89049 | 0,74867 | 0,81990 | 0,92239 |
| T>A | G.A | 0,37185 | 0,36563 | 0,45762 | 0,38167 |
| T>A | G.C | 0,34249 | 0,27857 | 0,45762 | 0,60432 |
| T>A | G.G | 0,48928 | 0,31339 | 0,45762 | 0,82697 |
| T>A | G.T | 0,59692 | 0,47880 | 0,61969 | 0,60432 |
| T>A | T.A | 0,91985 | 1,07948 | 1,10592 | 0,63613 |
| T>A | T.C | 0,34249 | 0,65291 | 0,46715 | 0,57251 |
| T>A | T.G | 0,69478 | 0,52232 | 0,94384 | 0,76335 |
| T>A | T.T | 0,97856 | 0,91407 | 1,08685 | 0,92239 |
| T>C | A.A | 2,57363 | 2,37659 | 2,06883 | 3,02162 |
| T>C | A.C | 1,09599 | 1,02724 | 1,13452 | 1,01781 |
| T>C | A.G | 1,68313 | 1,47993 | 1,55400 | 2,09923 |
| T>C | A.T | 2,09413 | 2,17637 | 2,31671 | 1,81297 |
| T>C | C.A | 1,21342 | 1,04465 | 1,11545 | 0,92239 |
| T>C | C.C | 1,31128 | 1,29711 | 1,14405 | 1,17684 |
| T>C | C.G | 1,46785 | 1,14041 | 1,18219 | 1,90839 |
| T>C | C.T | 1,52656 | 1,93261 | 1,69701 | 1,55852 |
| T>C | G.A | 1,09599 | 1,27970 | 1,08685 | 1,14503 |
| T>C | G.C | 1,14492 | 0,96630 | 0,94384 | 0,89058 |
| T>C | G.G | 1,00792 | 0,78349 | 1,06778 | 1,17684 |
| T>C | G.T | 1,25256 | 1,42770 | 1,38240 | 0,98600 |
| T>C | T.A | 1,46785 | 1,32323 | 1,19172 | 1,17684 |
| T>C | T.C | 1,32106 | 1,27100 | 1,17265 | 1,24045 |
| T>C | T.G | 0,95899 | 0,72255 | 1,00104 | 1,01781 |
| T>C | T.T | 1,72228 | 1,61051 | 1,97349 | 1,36768 |
| T>G | A.A | 1,43849 | 1,20135 | 1,39193 | 0,95419 |
| T>G | A.C | 0,26421 | 0,31339 | 0,27648 | 0,19083 |
| T>G | A.G | 0,49907 | 0,36563 | 0,43855 | 0,54071 |
| T>G | A.T | 0,85135 | 1,05336 | 0,87710 | 0,73155 |
| T>G | C.A | 0,86114 | 0,72255 | 1,00104 | 0,38167 |
| T>G | C.C | 0,43057 | 0,72255 | 0,52435 | 0,76335 |
| T>G | C.G | 0,68499 | 0,62679 | 0,81990 | 0,60432 |
| T>G | C.T | 2,33878 | 4,70967 | 2,20230 | 1,01781 |
| T>G | G.A | 0,42078 | 0,41786 | 0,41948 | 0,47709 |
| T>G | G.C | 0,26421 | 0,25245 | 0,31461 | 0,54071 |

|               |     |         |         |         |         |
|---------------|-----|---------|---------|---------|---------|
| <b>T&gt;G</b> | G.G | 0,38164 | 0,47009 | 0,50529 | 1,43129 |
| <b>T&gt;G</b> | G.T | 0,67521 | 1,78462 | 0,91524 | 0,60432 |
| <b>T&gt;G</b> | T.A | 1,85928 | 1,69757 | 2,15463 | 1,14503 |
| <b>T&gt;G</b> | T.C | 0,49907 | 0,46139 | 0,34321 | 0,73155 |
| <b>T&gt;G</b> | T.G | 0,70456 | 0,58326 | 0,78177 | 0,73155 |
| <b>T&gt;G</b> | T.T | 2,06478 | 2,23731 | 2,28811 | 1,74936 |

**Table S5.** Distribution of non-synonymous mutations within CLL, HC-MBL, LC-MBL and PMN samples.

| Sample ID    | Entity | nonsyn SNV | missense SNV | nonsense SNV | frameshift indel | nonframeshift indel | unknown |
|--------------|--------|------------|--------------|--------------|------------------|---------------------|---------|
| CLL_1        | CLL    | 14         | 11           | 1            | 2                | 0                   | 0       |
| CLL_2        | CLL    | 11         | 11           | 0            | 0                | 0                   | 0       |
| CLL_3        | CLL    | 19         | 16           | 2            | 0                | 1                   | 0       |
| CLL_4        | CLL    | 6          | 4            | 2            | 0                | 0                   | 0       |
| CLL_5        | CLL    | 8          | 7            | 0            | 1                | 0                   | 0       |
| HC-MBL_1     | HC-MBL | 9          | 7            | 0            | 1                | 0                   | 1       |
| HC-MBL_2     | HC-MBL | 13         | 11           | 1            | 1                | 0                   | 0       |
| HC-MBL_3     | HC-MBL | 14         | 11           | 1            | 2                | 0                   | 0       |
| HC-MBL_4     | HC-MBL | 27         | 22           | 2            | 2                | 0                   | 1       |
| HC-MBL_5     | HC-MBL | 11         | 10           | 1            | 0                | 0                   | 0       |
| LC-MBL_1     | LC-MBL | 1          | 1            | 0            | 0                | 0                   | 0       |
| LC-MBL_2     | LC-MBL | 16         | 14           | 1            | 1                | 0                   | 0       |
| LC-MBL_3     | LC-MBL | 11         | 10           | 0            | 1                | 0                   | 0       |
| LC-MBL_4     | LC-MBL | 3          | 3            | 0            | 0                | 0                   | 0       |
| LC-MBL_5     | LC-MBL | 9          | 8            | 1            | 0                | 0                   | 0       |
| LC-MBL_6     | LC-MBL | 13         | 11           | 0            | 2                | 0                   | 0       |
| CLL_1-PMN    | PMN    | 0          | 0            | 0            | 0                | 0                   | 0       |
| CLL_2-PMN    | PMN    | 0          | 0            | 0            | 0                | 0                   | 0       |
| CLL_4-PMN    | PMN    | 1          | 1            | 0            | 0                | 0                   | 0       |
| CLL_5-PMN    | PMN    | 1          | 1            | 0            | 0                | 0                   | 0       |
| HC-MBL_1-PMN | PMN    | 0          | 0            | 0            | 0                | 0                   | 0       |
| HC-MBL_2-PMN | PMN    | 0          | 0            | 0            | 0                | 0                   | 0       |
| HC-MBL_3-PMN | PMN    | 0          | 0            | 0            | 0                | 0                   | 0       |
| HC-MBL_4-PMN | PMN    | 0          | 0            | 0            | 0                | 0                   | 0       |
| HC-MBL_5-PMN | PMN    | 6          | 2            | 0            | 4                | 0                   | 0       |
| LC-MBL_1-PMN | PMN    | 1          | 1            | 0            | 0                | 0                   | 0       |
| LC-MBL_2-PMN | PMN    | 0          | 0            | 0            | 0                | 0                   | 0       |
| LC-MBL_3-PMN | PMN    | 4          | 1            | 0            | 3                | 0                   | 0       |
| LC-MBL_4-PMN | PMN    | 0          | 0            | 0            | 0                | 0                   | 0       |
| LC-MBL_5-PMN | PMN    | 1          | 0            | 0            | 0                | 1                   | 0       |
| LC-MBL_6-PMN | PMN    | 1          | 1            | 0            | 0                | 0                   | 0       |

**Table S6.** Exonic non-synonymous mutations identified in the present study.

| Sample | Entity | Chr | Start     | End       | Ref base | Var base | Gene      | Mutation type     | VAF% | Transcripts                                       |
|--------|--------|-----|-----------|-----------|----------|----------|-----------|-------------------|------|---------------------------------------------------|
| CLL_1  | CLL    | 2   | 140992404 | 140992404 | G        | A        | LRP1B     | nonsyn SNV        | 0.33 | LRP1B:NM_018557:exon90:c.C13610T:p.A4537V         |
| CLL_1  | CLL    | 3   | 193016968 | 193016968 | G        | T        | ATP13A5   | nonsyn SNV        | 0.47 | ATP13A5:NM_198505:exon25:c.C2800A:p.Q934K         |
| CLL_1  | CLL    | 4   | 53494171  | 53494171  | T        | C        | USP46     | nonsyn SNV        | 0.18 | USP46:NM_001134223:exon3:c.A256G:p.K86E           |
| CLL_1  | CLL    | 9   | 90534209  | 90534209  | C        | -        | SPATA31C1 | frameshift del    | 0.18 | SPATA31C1:NM_001145124:exon2:c.229delC:p.P77fs    |
| CLL_1  | CLL    | 9   | 90534212  | 90534212  | A        | T        | SPATA31C1 | nonsyn SNV        | 0.18 | SPATA31C1:NM_001145124:exon2:c.A232T:p.T78S       |
| CLL_1  | CLL    | 11  | 66281935  | 66281935  | G        | A        | BBS1      | nonsyn SNV        | 0.43 | BBS1:NM_024649:exon4:c.G218A:p.G73E               |
| CLL_1  | CLL    | 11  | 123848299 | 123848299 | C        | G        | OR10S1    | nonsyn SNV        | 0.48 | OR10S1:NM_001004474:exon1:c.G100C:p.A34P          |
| CLL_1  | CLL    | 12  | 93148037  | 93148037  | A        | G        | PLEKHG7   | nonsyn SNV        | 0.47 | PLEKHG7:NM_001004330:exon6:c.A487G:p.I163V        |
| CLL_1  | CLL    | 12  | 132625056 | 132625056 | C        | T        | DDX51     | nonsyn SNV        | 0.37 | DDX51:NM_175066:exon11:c.G1585A:p.G529S           |
| CLL_1  | CLL    | 16  | 5121909   | 5121909   | T        | G        | ALG1      | nonsyn SNV        | 0.44 | ALG1:NM_019109:exon1:c.T59G:p.L20R                |
| CLL_1  | CLL    | 17  | 73487171  | 73487171  | -        | G        | KIAA0195  | frameshift ins    | 0.44 | KIAA0195:NM_014738:exon12:c.1171dupG:p.L390fs     |
| CLL_1  | CLL    | 20  | 51872693  | 51872693  | G        | A        | TSHZ2     | stopgain SNV      | 0.39 | TSHZ2:NM_001193421:exon2:c.G2687A:p.W896X         |
| CLL_1  | CLL    | X   | 38262941  | 38262941  | T        | C        | OTC       | nonsyn SNV        | 0.49 | OTC:NM_000531:exon6:c.T611C:p.I204T               |
| CLL_1  | CLL    | X   | 46918093  | 46918093  | C        | T        | PHF16     | nonsyn SNV        | 0.46 | PHF16:NM_001077445:exon11:c.C2086T:p.P696S        |
| CLL_2  | CLL    | 2   | 220422581 | 220422581 | C        | T        | OBSL1     | nonsyn SNV        | 0.39 | OBSL1:NM_001173431:exon11:c.G3754A:p.G1252R       |
| CLL_2  | CLL    | 3   | 134339623 | 134339623 | C        | T        | KY        | nonsyn SNV        | 0.48 | KY:NM_178554:exon7:c.G560A:p.R187H                |
| CLL_2  | CLL    | 7   | 6189368   | 6189368   | C        | T        | USP42     | nonsyn SNV        | 0.46 | USP42:NM_032172:exon13:c.C1541T:p.P514L           |
| CLL_2  | CLL    | 7   | 100687063 | 100687063 | C        | A        | MUC17     | nonsyn SNV        | 0.31 | MUC17:NM_001040105:exon3:c.C12366A:p.N4122K       |
| CLL_2  | CLL    | 10  | 103792869 | 103792869 | T        | A        | C10orf76  | nonsyn SNV        | 0.41 | C10orf76:NM_024541:exon4:c.A220T:p.I74F           |
| CLL_2  | CLL    | 14  | 105416323 | 105416323 | T        | C        | AHNAK2    | nonsyn SNV        | 0.28 | AHNAK2:NM_138420:exon7:c.A5465G:p.K1822R          |
| CLL_2  | CLL    | 15  | 29398949  | 29398949  | G        | A        | APBA2     | nonsyn SNV        | 0.47 | APBA2:NM_001130414:exon10:c.G1808A:p.G603E        |
| CLL_2  | CLL    | 16  | 2814622   | 2814622   | A        | G        | SRRM2     | nonsyn SNV        | 0.27 | SRRM2:NM_016333:exon11:c.A4093G:p.T1365A          |
| CLL_2  | CLL    | 17  | 10355349  | 10355349  | C        | T        | MYH4      | nonsyn SNV        | 0.21 | MYH4:NM_017533:exon27:c.G3647A:p.R1216Q           |
| CLL_2  | CLL    | 17  | 15508600  | 15508600  | C        | T        | CDRT1     | nonsyn SNV        | 0.46 | CDRT1:NM_006382:exon7:c.G1370A:p.R457Q            |
| CLL_2  | CLL    | 19  | 440908    | 440908    | G        | A        | SHC2      | nonsyn SNV        | 0.54 | SHC2:NM_012435:exon2:c.C493T:p.R165C              |
| CLL_3  | CLL    | 1   | 37947226  | 37947228  | AGA      | -        | ZC3H12A   | nonframeshift del | 0.56 | ZC3H12A:NM_025079:exon4:c.608_610del:p.203_204del |
| CLL_3  | CLL    | 1   | 160326083 | 160326083 | G        | A        | NCSTN     | nonsyn SNV        | 0.45 | NCSTN:NM_015331:exon14:c.G1585A:p.A529T           |
| CLL_3  | CLL    | 1   | 173839563 | 173839563 | G        | A        | ZBTB37    | nonsyn SNV        | 0.54 | ZBTB37:NM_001122770:exon3:c.G200A:p.S67N          |
| CLL_3  | CLL    | 2   | 216986846 | 216986846 | T        | -        | XRCC5     | stopgain SNV      | 0.38 | XRCC5:NM_021141:exon6:c.553delT:p.L185X           |
| CLL_3  | CLL    | 5   | 156641319 | 156641319 | C        | T        | ITK       | nonsyn SNV        | 0.59 | ITK:NM_005546:exon4:c.C443T:p.P148L               |
| CLL_3  | CLL    | 7   | 84628865  | 84628865  | T        | C        | SEMA3D    | nonsyn SNV        | 0.53 | SEMA3D:NM_152754:exon17:c.A2225G:p.Q742R          |
| CLL_3  | CLL    | 7   | 99117531  | 99117531  | A        | G        | ZKSCAN5   | nonsyn SNV        | 0.38 | ZKSCAN5:NM_014569:exon4:c.A635G:p.Q212R           |
| CLL_3  | CLL    | 7   | 148080936 | 148080936 | T        | C        | CNTNAP2   | nonsyn SNV        | 0.39 | CNTNAP2:NM_014141:exon22:c.T3671C:p.M1224T        |
| CLL_3  | CLL    | 8   | 42587175  | 42587175  | T        | C        | CHRN3     | nonsyn SNV        | 0.51 | CHRN3:NM_000749:exon5:c.T725C:p.I242T             |
| CLL_3  | CLL    | 8   | 118819456 | 118819456 | T        | C        | EXT1      | nonsyn SNV        | 0.50 | EXT1:NM_000127:exon9:c.A1883G:p.K628R             |
| CLL_3  | CLL    | 9   | 136323206 | 136323206 | G        | A        | ADAMTS13  | nonsyn SNV        | 0.43 | ADAMTS13:NM_139025:exon28:c.G4067A:p.S1356N       |
| CLL_3  | CLL    | 11  | 64374910  | 64374910  | T        | A        | NRXN2     | nonsyn SNV        | 0.50 | NRXN2:NM_138734:exon7:c.A1759T:p.S587C            |
| CLL_3  | CLL    | 15  | 33954395  | 33954395  | T        | A        | RYR3      | nonsyn SNV        | 0.59 | RYR3:NM_001036:exon35:c.T4664A:p.M1555K           |
| CLL_3  | CLL    | 18  | 28609480  | 28609480  | G        | A        | DSC3      | stopgain SNV      | 0.38 | DSC3:NM_001941:exon4:c.C469T:p.Q157X              |
| CLL_3  | CLL    | 19  | 42856556  | 42856556  | T        | C        | MEGF8     | nonsyn SNV        | 0.53 | MEGF8:NM_001410:exon18:c.T3097C:p.C1033R          |
| CLL_3  | CLL    | 20  | 14306666  | 14306666  | C        | A        | FLRT3     | nonsyn SNV        | 0.50 | FLRT3:NM_013281:exon2:c.G1487T:p.C496F            |
| CLL_3  | CLL    | 21  | 19713763  | 19713763  | T        | G        | TMPRSS15  | nonsyn SNV        | 0.51 | TMPRSS15:NM_002772:exon13:c.A1531C:p.T511P        |
| CLL_3  | CLL    | X   | 9864575   | 9864575   | A        | G        | SHROOM2   | nonsyn SNV        | 0.38 | SHROOM2:NM_001649:exon4:c.A2627G:p.Y876C          |
| CLL_3  | CLL    | X   | 86888883  | 86888883  | A        | C        | KLHL4     | nonsyn SNV        | 0.45 | KLHL4:NM_019117:exon8:c.A1684C:p.T562P            |

|          |        |    |           |           |   |   |          |                |      |                                                |
|----------|--------|----|-----------|-----------|---|---|----------|----------------|------|------------------------------------------------|
| CLL_4    | CLL    | 1  | 17312817  | 17312817  | G | A | ATP13A2  | nonsyn SNV     | 0.39 | ATP13A2:NM_001141974:exon27:c.C3140T:p.P1047L  |
| CLL_4    | CLL    | 2  | 196825024 | 196825024 | G | A | DNAH7    | stopgain SNV   | 0.42 | DNAH7:NM_018897:exon18:c.C2851T:p.R951X        |
| CLL_4    | CLL    | 7  | 113518059 | 113518059 | C | A | PPP1R3A  | stopgain SNV   | 0.41 | PPP1R3A:NM_002711:exon4:c.G3088T:p.G1030X      |
| CLL_4    | CLL    | 11 | 77907590  | 77907590  | C | T | USP35    | nonsyn SNV     | 0.58 | USP35:NM_020798:exon2:c.C299T:p.A100V          |
| CLL_4    | CLL    | 12 | 109541352 | 109541352 | C | T | UNG      | nonsyn SNV     | 0.54 | UNG:NM_003362:exon5:c.C710T:p.S237L            |
| CLL_4    | CLL    | 17 | 62007661  | 62007661  | T | C | CD79B    | nonsyn SNV     | 0.41 | CD79B:NM_000626:exon3:c.A203G:p.N68S           |
| CLL_5    | CLL    | 1  | 19475118  | 19475118  | A | T | UBR4     | nonsyn SNV     | 0.47 | UBR4:NM_020765:exon50:c.T7433A:p.L2478Q        |
| CLL_5    | CLL    | 1  | 27332923  | 27332923  | G | A | FAM46B   | nonsyn SNV     | 0.46 | FAM46B:NM_052943:exon2:c.C790T:p.R264C         |
| CLL_5    | CLL    | 2  | 54133825  | 54133825  | C | - | PSME4    | frameshift del | 0.42 | PSME4:NM_014614:exon26:c.2853delG:p.R951fs     |
| CLL_5    | CLL    | 9  | 104239142 | 104239142 | T | C | TMEM246  | nonsyn SNV     | 0.30 | TMEM246:NM_032342:exon2:c.A233G:p.H78R         |
| CLL_5    | CLL    | 10 | 5567322   | 5567322   | G | A | CALML3   | nonsyn SNV     | 0.48 | CALML3:NM_005185:exon1:c.G274A:p.V92M          |
| CLL_5    | CLL    | 12 | 18443943  | 18443943  | T | G | PIK3C2G  | nonsyn SNV     | 0.46 | PIK3C2G:NM_004570:exon4:c.T916G:p.C306G        |
| CLL_5    | CLL    | 13 | 114434316 | 114434316 | G | C | GRK1     | nonsyn SNV     | 0.62 | GRK1:NM_002929:exon5:c.G1194C:p.K398N          |
| CLL_5    | CLL    | 22 | 23230234  | 23230234  | A | G | IGLL5    | nonsyn SNV     | 0.44 | IGLL5:NM_001178126:exon1:c.A1G:p.M1V           |
| CLL_5    | CLL    | 22 | 23230348  | 23230348  | C | G | IGLL5    | nonsyn SNV     | 0.58 | IGLL5:NM_001178126:exon1:c.C115G:p.L39V        |
| HC-MBL_1 | HC-MBL | 2  | 138378270 | 138378270 | A | G | THSD7B   | unknown        | 0.32 | UNKNOWN                                        |
| HC-MBL_1 | HC-MBL | 3  | 10429991  | 10429991  | C | T | ATP2B2   | nonsyn SNV     | 0.47 | ATP2B2:NM_001001331:exon6:c.G877A:p.G293S      |
| HC-MBL_1 | HC-MBL | 3  | 81692113  | 81692113  | C | - | GBE1     | frameshift del | 0.58 | GBE1:NM_000158:exon7:c.811delG:p.E271fs        |
| HC-MBL_1 | HC-MBL | 4  | 40339335  | 40339335  | A | T | CHRNA9   | nonsyn SNV     | 0.28 | CHRNA9:NM_017581:exon3:c.A319T:p.I107F         |
| HC-MBL_1 | HC-MBL | 4  | 85722851  | 85722851  | C | T | WDFY3    | nonsyn SNV     | 0.36 | WDFY3:NM_014991:exon17:c.G2774A:p.R925Q        |
| HC-MBL_1 | HC-MBL | 5  | 140051099 | 140051099 | C | G | DND1     | nonsyn SNV     | 0.57 | DND1:NM_194249:exon4:c.G841C:p.G281R           |
| HC-MBL_1 | HC-MBL | 7  | 89939400  | 89939400  | G | C | C7orf63  | nonsyn SNV     | 0.31 | C7orf63:NM_001039706:exon23:c.G2674C:p.V892L   |
| HC-MBL_1 | HC-MBL | 11 | 119291066 | 119291066 | G | T | THY1     | nonsyn SNV     | 0.38 | THY1:NM_006288:exon3:c.C68A:p.T23N             |
| HC-MBL_1 | HC-MBL | 12 | 56565175  | 56565175  | C | T | SMARCC2  | nonsyn SNV     | 0.33 | SMARCC2:NM_003075:exon21:c.G2134A:p.V712M      |
| HC-MBL_2 | HC-MBL | 1  | 149902701 | 149902701 | C | T | MTMR11   | nonsyn SNV     | 0.39 | MTMR11:NM_181873:exon13:c.G1231A:p.G411R       |
| HC-MBL_2 | HC-MBL | 2  | 71191572  | 71191572  | - | C | ATP6V1B1 | frameshift ins | 0.38 | ATP6V1B1:NM_001692:exon12:c.1149dupC:p.Y383fs  |
| HC-MBL_2 | HC-MBL | 2  | 170592138 | 170592138 | T | C | KLHL23   | nonsyn SNV     | 0.48 | KLHL23:NM_144711:exon2:c.T614C:p.I205T         |
| HC-MBL_2 | HC-MBL | 2  | 170592180 | 170592180 | T | C | KLHL23   | nonsyn SNV     | 0.40 | KLHL23:NM_144711:exon2:c.T656C:p.L219P         |
| HC-MBL_2 | HC-MBL | 4  | 153249504 | 153249504 | C | G | FBXW7    | nonsyn SNV     | 0.26 | FBXW7:NM_001013415:exon8:c.G920C:p.W307S       |
| HC-MBL_2 | HC-MBL | 5  | 137520602 | 137520602 | T | C | KIF20A   | nonsyn SNV     | 0.18 | KIF20A:NM_005733:exon14:c.T1790C:p.V597A       |
| HC-MBL_2 | HC-MBL | 14 | 76431943  | 76431943  | T | C | TGFB3    | nonsyn SNV     | 0.28 | TGFB3:NM_003239:exon4:c.A742G:p.I248V          |
| HC-MBL_2 | HC-MBL | 16 | 58550456  | 58550456  | T | C | SETD6    | nonsyn SNV     | 0.45 | SETD6:NM_001160305:exon4:c.T551C:p.I184T       |
| HC-MBL_2 | HC-MBL | 16 | 67854817  | 67854817  | C | T | TSNAXIP1 | stopgain SNV   | 0.24 | TSNAXIP1:NM_018430:exon3:c.C61T:p.R21X         |
| HC-MBL_2 | HC-MBL | 17 | 4876210   | 4876210   | G | A | CAMTA2   | nonsyn SNV     | 0.23 | CAMTA2:NM_001171166:exon14:c.C2363T:p.P788L    |
| HC-MBL_2 | HC-MBL | 18 | 32470332  | 32470332  | A | T | DTNA     | nonsyn SNV     | 0.46 | DTNA:NM_001198938:exon20:c.A2103T:p.L701F      |
| HC-MBL_2 | HC-MBL | 20 | 42891891  | 42891891  | C | T | GDAP1L1  | nonsyn SNV     | 0.48 | GDAP1L1:NM_001256739:exon3:c.C395T:p.T132M     |
| HC-MBL_2 | HC-MBL | 21 | 45550531  | 45550531  | C | T | PWP2     | nonsyn SNV     | 0.18 | PWP2:NM_005049:exon21:c.C2638T:p.R880W         |
| HC-MBL_3 | HC-MBL | 1  | 24426198  | 24426198  | A | T | MYOM3    | nonsyn SNV     | 0.50 | MYOM3:NM_152372:exon6:c.T628A:p.Y210N          |
| HC-MBL_3 | HC-MBL | 1  | 103491441 | 103491441 | T | G | COL11A1  | nonsyn SNV     | 0.83 | COL11A1:NM_080629:exon6:c.A848C:p.K283T        |
| HC-MBL_3 | HC-MBL | 1  | 145457068 | 145457068 | C | T | POLR3GL  | nonsyn SNV     | 0.36 | POLR3GL:NM_032305:exon7:c.G493A:p.E165K        |
| HC-MBL_3 | HC-MBL | 1  | 236205413 | 236205413 | G | A | NID1     | nonsyn SNV     | 0.46 | NID1:NM_002508:exon4:c.C932T:p.T311M           |
| HC-MBL_3 | HC-MBL | 5  | 154394302 | 154394302 | C | T | KIF4B    | stopgain SNV   | 0.48 | KIF4B:NM_001099293:exon1:c.C883T:p.R295X       |
| HC-MBL_3 | HC-MBL | 6  | 138576640 | 138576640 | G | T | KIAA1244 | nonsyn SNV     | 0.56 | KIAA1244:NM_020340:exon10:c.G838T:p.A280S      |
| HC-MBL_3 | HC-MBL | 10 | 329247    | 329247    | A | - | DIP2C    | frameshift del | 0.61 | DIP2C:NM_014974:exon35:c.4259delT:p.F1420fs    |
| HC-MBL_3 | HC-MBL | 11 | 22301109  | 22301109  | A | C | ANO5     | nonsyn SNV     | 0.44 | ANO5:NM_001142649:exon22:c.A2537C:p.K846T      |
| HC-MBL_3 | HC-MBL | 12 | 96641028  | 96641028  | - | C | ELK3     | frameshift ins | 0.54 | ELK3:NM_005230:exon3:c.519dupC:p.S173fs        |
| HC-MBL_3 | HC-MBL | 14 | 79434558  | 79434558  | A | C | NRXN3    | nonsyn SNV     | 0.59 | NRXN3:NM_004796:exon11:c.A1892C:p.N631T        |
| HC-MBL_3 | HC-MBL | 18 | 14851894  | 14851894  | C | A | ANKRD30B | nonsyn SNV     | 0.31 | ANKRD30B:NM_001145029:exon36:c.C3594A:p.N1198K |
| HC-MBL_3 | HC-MBL | 19 | 4182475   | 4182475   | G | A | SIRT6    | nonsyn SNV     | 0.39 | SIRT6:NM_001193285:exon1:c.C62T:p.P21L         |

|          |        |    |           |           |       |   |          |                |      |                                                  |
|----------|--------|----|-----------|-----------|-------|---|----------|----------------|------|--------------------------------------------------|
| HC-MBL_3 | HC-MBL | 19 | 14070057  | 14070057  | C     | T | DCAF15   | nonsyn SNV     | 0.31 | DCAF15:NM_138353:exon7:c.C985T;p.R329C           |
| HC-MBL_3 | HC-MBL | 22 | 23230439  | 23230439  | G     | A | IGLL5    | nonsyn SNV     | 0.52 | IGLL5:NM_001178126:exon1:c.G206A;p.R69K          |
| HC-MBL_4 | HC-MBL | 1  | 12429537  | 12429537  | A     | G | VPS13D   | nonsyn SNV     | 0.42 | VPS13D:NM_018156:exon53:c.A10513G;p.T3505A       |
| HC-MBL_4 | HC-MBL | 2  | 71743313  | 71743313  | C     | A | DYSF     | nonsyn SNV     | 0.50 | DYSF:NM_001130455:exon8:c.C799A;p.L267I          |
| HC-MBL_4 | HC-MBL | 3  | 20027162  | 20027162  | A     | C | PP2D1    | nonsyn SNV     | 0.32 | PP2D1:NM_001252657:exon3:c.T1603G;p.S535A        |
| HC-MBL_4 | HC-MBL | 4  | 74274486  | 74274490  | CTGCT | - | ALB      | frameshift del | 0.47 | ALB:NM_000477:exon4:c.446_450del;p.149_150del    |
| HC-MBL_4 | HC-MBL | 4  | 184129241 | 184129241 | C     | T | WWC2     | nonsyn SNV     | 0.47 | WWC2:NM_024949:exon3:c.C377T;p.A126V             |
| HC-MBL_4 | HC-MBL | 5  | 131008585 | 131008585 | G     | A | FNIP1    | nonsyn SNV     | 0.57 | FNIP1:NM_001008738:exon13:c.C1468T;p.R490W       |
| HC-MBL_4 | HC-MBL | 5  | 139231273 | 139231273 | T     | A | NRG2     | nonsyn SNV     | 0.32 | NRG2:NM_001184935:exon7:c.A1490T;p.Y497F         |
| HC-MBL_4 | HC-MBL | 6  | 26234902  | 26234902  | C     | G | HIST1H1D | nonsyn SNV     | 0.50 | HIST1H1D:NM_005320:exon1:c.G260C;p.S87T          |
| HC-MBL_4 | HC-MBL | 6  | 138199730 | 138199730 | T     | A | TNFAIP3  | nonsyn SNV     | 0.49 | TNFAIP3:NM_001270507:exon7:c.T1148A;p.M383K      |
| HC-MBL_4 | HC-MBL | 7  | 44099168  | 44099168  | A     | G | DBNL     | nonsyn SNV     | 0.42 | DBNL:NM_001014436:exon11:c.A958G;p.S320G         |
| HC-MBL_4 | HC-MBL | 7  | 111368443 | 111368443 | C     | T | DOCK4    | nonsyn SNV     | 0.35 | DOCK4:NM_014705:exon52:c.G5788A;p.A1930T         |
| HC-MBL_4 | HC-MBL | 9  | 139390649 | 139390650 | AG    | - | NOTCH1   | frameshift del | 0.20 | NOTCH1:NM_017617:exon34:c.7541_7542del;p.P2514fs |
| HC-MBL_4 | HC-MBL | 9  | 127232807 | 127232807 | G     | A | GPR144   | nonsyn SNV     | 0.61 | GPR144:NM_001161808:exon17:c.G2593A;p.V86S       |
| HC-MBL_4 | HC-MBL | 11 | 20077497  | 20077497  | G     | A | NAV2     | nonsyn SNV     | 0.39 | NAV2:NM_001111019:exon9:c.G2017A;p.E673K         |
| HC-MBL_4 | HC-MBL | 11 | 119027281 | 119027281 | T     | A | ABCG4    | nonsyn SNV     | 0.48 | ABCG4:NM_001142505:exon8:c.T818A;p.L273N         |
| HC-MBL_4 | HC-MBL | 12 | 6184709   | 6184709   | C     | T | VWF      | stopgain SNV   | 0.40 | VWF:NM_000552:exon7:c.G666A;p.W222X              |
| HC-MBL_4 | HC-MBL | 12 | 6938098   | 6938098   | A     | T | LEPREL2  | unknown        | 0.54 | UNKNOWN                                          |
| HC-MBL_4 | HC-MBL | 12 | 38714077  | 38714077  | T     | C | ALG10B   | nonsyn SNV     | 0.43 | ALG10B:NM_001013620:exon3:c.T484C;p.F162L        |
| HC-MBL_4 | HC-MBL | 12 | 117610322 | 117610322 | T     | A | FBXO21   | nonsyn SNV     | 0.40 | FBXO21:NM_015002:exon7:c.A967T;p.N323Y           |
| HC-MBL_4 | HC-MBL | 13 | 42393505  | 42393505  | T     | C | VWA8     | nonsyn SNV     | 0.45 | VWA8:NM_001009814:exon15:c.A1718G;p.H573R        |
| HC-MBL_4 | HC-MBL | 14 | 69259667  | 69259667  | G     | A | ZFP36L1  | stopgain SNV   | 0.52 | ZFP36L1:NM_001244701:exon2:c.C196T;p.R66X        |
| HC-MBL_4 | HC-MBL | 14 | 73989372  | 73989372  | C     | T | HEATR4   | nonsyn SNV     | 0.32 | HEATR4:NM_203309:exon2:c.G485A;p.R162H           |
| HC-MBL_4 | HC-MBL | 15 | 39886510  | 39886510  | T     | A | THBS1    | nonsyn SNV     | 0.48 | THBS1:NM_003246:exon21:c.T3374A;p.M1125K         |
| HC-MBL_4 | HC-MBL | 17 | 26733131  | 26733131  | A     | G | SLC46A1  | nonsyn SNV     | 0.45 | SLC46A1:NM_001242366:exon1:c.T2C;p.M1T           |
| HC-MBL_4 | HC-MBL | 18 | 3879897   | 3879897   | C     | T | DLGAP1   | nonsyn SNV     | 0.38 | DLGAP1:NM_001242761:exon4:c.G172A;p.V58M         |
| HC-MBL_4 | HC-MBL | 18 | 59170258  | 59170258  | A     | G | CDH20    | nonsyn SNV     | 0.41 | CDH20:NM_031891:exon4:c.A734G;p.K245R            |
| HC-MBL_4 | HC-MBL | 20 | 62421203  | 62421203  | G     | A | ZBTB46   | nonsyn SNV     | 0.61 | ZBTB46:NM_025224:exon2:c.C908T;p.S303L           |
| HC-MBL_5 | HC-MBL | 2  | 77745761  | 77745761  | C     | T | LRRTM4   | nonsyn SNV     | 0.20 | LRRTM4:NM_001134745:exon3:c.G1234A;p.G412S       |
| HC-MBL_5 | HC-MBL | 2  | 141291664 | 141291664 | C     | T | LRP1B    | nonsyn SNV     | 0.29 | LRP1B:NM_018557:exon47:c.G7688A;p.R2563H         |
| HC-MBL_5 | HC-MBL | 5  | 5473726   | 5473726   | T     | G | KIAA0947 | stopgain SNV   | 0.43 | KIAA0947:NM_015325:exon16:c.T6278G;p.L2093X      |
| HC-MBL_5 | HC-MBL | 8  | 2832075   | 2832075   | C     | T | CSMD1    | nonsyn SNV     | 0.48 | CSMD1:NM_033225:exon56:c.G8638A;p.V2880I         |
| HC-MBL_5 | HC-MBL | 8  | 65493578  | 65493578  | G     | T | BHLHE22  | nonsyn SNV     | 0.41 | BHLHE22:NM_152414:exon1:c.G231T;p.L77F           |
| HC-MBL_5 | HC-MBL | 10 | 54042064  | 54042064  | T     | C | PRKG1    | nonsyn SNV     | 0.47 | PRKG1:NM_001098512:exon14:c.T1652C;p.L551P       |
| HC-MBL_5 | HC-MBL | 10 | 93740251  | 93740251  | T     | G | BTAF1    | nonsyn SNV     | 0.46 | BTAF1:NM_003972:exon15:c.T1691G;p.L564R          |
| HC-MBL_5 | HC-MBL | 14 | 37050262  | 37050262  | C     | G | NKX2-8   | nonsyn SNV     | 0.45 | NKX2-8:NM_014360:exon2:c.G565C;p.V189L           |
| HC-MBL_5 | HC-MBL | 18 | 29454651  | 29454651  | C     | T | TRAPPC8  | nonsyn SNV     | 0.23 | TRAPPC8:NM_014939:exon13:c.G1745A;p.R582H        |
| HC-MBL_5 | HC-MBL | 20 | 25462723  | 25462723  | C     | T | NINL     | nonsyn SNV     | 0.55 | NINL:NM_025176:exon14:c.G1691A;p.R564H           |
| HC-MBL_5 | HC-MBL | 22 | 23235998  | 23235998  | G     | C | IGLL5    | nonsyn SNV     | 0.45 | IGLL5:NM_001178126:exon2:c.G325C;p.G109R         |
| LC-MBL_1 | LC-MBL | 10 | 125528215 | 125528215 | C     | T | CPXM2    | nonsyn SNV     | 0.25 | CPXM2:NM_198148:exon9:c.G1126A;p.A376T           |
| LC-MBL_2 | LC-MBL | 2  | 73675413  | 73675413  | C     | G | ALMS1    | nonsyn SNV     | 0.35 | ALMS1:NM_015120:exon8:c.C1756G;p.Q586E           |
| LC-MBL_2 | LC-MBL | 2  | 215809726 | 215809726 | T     | A | ABCA12   | nonsyn SNV     | 0.45 | ABCA12:NM_015657:exon41:c.A6388T;p.S2130C        |
| LC-MBL_2 | LC-MBL | 3  | 190127746 | 190127746 | C     | T | CLDN16   | nonsyn SNV     | 0.50 | CLDN16:NM_006580:exon5:c.C839T;p.A280V           |
| LC-MBL_2 | LC-MBL | 4  | 8293128   | 8293128   | C     | T | HTRA3    | nonsyn SNV     | 0.25 | HTRA3:NM_053044:exon4:c.C740T;p.S247L            |
| LC-MBL_2 | LC-MBL | 4  | 158224886 | 158224886 | A     | C | GRIA2    | nonsyn SNV     | 0.44 | GRIA2:NM_000826:exon3:c.A412C;p.S138R            |
| LC-MBL_2 | LC-MBL | 5  | 140719538 | 140719538 | A     | G | PCDHGA2  | nonsyn SNV     | 0.38 | PCDHGA2:NM_018915:exon1:c.A1000G;p.I334V         |
| LC-MBL_2 | LC-MBL | 5  | 168678399 | 168678399 | G     | A | SLIT3    | stopgain SNV   | 0.38 | SLIT3:NM_001271946:exon2:c.C262T;p.R88X          |
| LC-MBL_2 | LC-MBL | 8  | 113241012 | 113241012 | C     | A | CSMD3    | nonsyn SNV     | 0.39 | CSMD3:NM_052900:exon68:c.G10430T;p.G3477V        |

|              |        |    |           |           |                      |   |           |                |      |                                                      |
|--------------|--------|----|-----------|-----------|----------------------|---|-----------|----------------|------|------------------------------------------------------|
| LC-MBL_2     | LC-MBL | 11 | 55798000  | 55798000  | A                    | G | OR5AS1    | nonsyn SNV     | 0.43 | OR5AS1:NM_001001921:exon1:c.A106G:p.T36A             |
| LC-MBL_2     | LC-MBL | 16 | 16271339  | 16271339  | C                    | A | ABCC6     | nonsyn SNV     | 0.50 | ABCC6:NM_0011171:exon19:c.G2560T:p.A854S             |
| LC-MBL_2     | LC-MBL | 17 | 4848222   | 4848222   | G                    | - | RNF167    | frameshift del | 0.36 | RNF167:NM_015528:exon10:c.964delG:p.G322fs           |
| LC-MBL_2     | LC-MBL | 18 | 24722740  | 24722740  | G                    | T | CHST9     | nonsyn SNV     | 0.55 | CHST9:NM_001256316:exon2:c.C34A:p.Q12K               |
| LC-MBL_2     | LC-MBL | 20 | 60318795  | 60318795  | G                    | A | CDH4      | nonsyn SNV     | 0.40 | CDH4:NM_001252338:exon2:c.G235A:p.V79M               |
| LC-MBL_2     | LC-MBL | X  | 100087817 | 100087817 | C                    | A | CSTF2     | nonsyn SNV     | 0.65 | CSTF2:NM_001325:exon10:c.C1126A:p.P376T              |
| LC-MBL_2     | LC-MBL | X  | 142596924 | 142596924 | T                    | G | SPANXN3   | nonsyn SNV     | 0.55 | SPANXN3:NM_001009609:exon2:c.A146C:p.Y49S            |
| LC-MBL_2     | LC-MBL | X  | 152981136 | 152981136 | G                    | A | BCAP31    | nonsyn SNV     | 0.38 | BCAP31:NM_001139441:exon4:c.C202T:p.R68C             |
| LC-MBL_3     | LC-MBL | 2  | 26950748  | 26950748  | C                    | T | KCNK3     | nonsyn SNV     | 0.52 | KCNK3:NM_002246:exon2:c.C497T:p.S166L                |
| LC-MBL_3     | LC-MBL | 3  | 164755760 | 164755760 | T                    | C | SI        | nonsyn SNV     | 0.44 | SI:NM_001041:exon21:c.A2354G:p.D785G                 |
| LC-MBL_3     | LC-MBL | 4  | 129127603 | 129127603 | T                    | A | LARP1B    | nonsyn SNV     | 0.52 | LARP1B:NM_018078:exon18:c.T2330A:p.F777Y             |
| LC-MBL_3     | LC-MBL | 9  | 90534209  | 90534209  | C                    | - | SPATA31C1 | frameshift del | 0.20 | SPATA31C1:NM_001145124:exon2:c.229delC:p.P77fs       |
| LC-MBL_3     | LC-MBL | 9  | 90534212  | 90534212  | A                    | T | SPATA31C1 | nonsyn SNV     | 0.20 | SPATA31C1:NM_001145124:exon2:c.A232T:p.T78S          |
| LC-MBL_3     | LC-MBL | 12 | 113874582 | 113874582 | C                    | T | SDSL      | nonsyn SNV     | 0.41 | SDSL:NM_138432:exon8:c.C698T:p.T233M                 |
| LC-MBL_3     | LC-MBL | 13 | 86369596  | 86369596  | G                    | A | SLITRK6   | nonsyn SNV     | 0.38 | SLITRK6:NM_032229:exon2:c.C1048T:p.R350C             |
| LC-MBL_3     | LC-MBL | 17 | 41891664  | 41891664  | T                    | A | MPP3      | nonsyn SNV     | 0.48 | MPP3:NM_001932:exon15:c.A1075T:p.M359L               |
| LC-MBL_3     | LC-MBL | 18 | 13056068  | 13056068  | A                    | G | CEP192    | nonsyn SNV     | 0.44 | CEP192:NM_032142:exon19:c.A3479G:p.E1160G            |
| LC-MBL_3     | LC-MBL | 19 | 14523407  | 14523407  | A                    | G | DDX39A    | nonsyn SNV     | 0.47 | DDX39A:NM_005804:exon3:c.T292C:p.F98L                |
| LC-MBL_3     | LC-MBL | 22 | 23230357  | 23230357  | A                    | G | IGLL5     | nonsyn SNV     | 0.62 | IGLL5:NM_001178126:exon1:c.A124G:p.M42V              |
| LC-MBL_4     | LC-MBL | 2  | 32733268  | 32733268  | T                    | C | BIRC6     | nonsyn SNV     | 0.40 | BIRC6:NM_016252:exon51:c.T9922C:p.S3308P             |
| LC-MBL_4     | LC-MBL | 19 | 21720566  | 21720566  | G                    | T | ZNF429    | nonsyn SNV     | 0.49 | ZNF429:NM_001001415:exon4:c.G1711T:p.D571Y           |
| LC-MBL_4     | LC-MBL | 22 | 23230365  | 23230365  | A                    | G | IGLL5     | nonsyn SNV     | 0.35 | IGLL5:NM_001256296:exon1:c.A26G:p.H9R                |
| LC-MBL_5     | LC-MBL | 1  | 63069667  | 63069667  | T                    | A | ANGPTL3   | nonsyn SNV     | 0.30 | ANGPTL3:NM_014495:exon6:c.T959A:p.I320K              |
| LC-MBL_5     | LC-MBL | 1  | 63069849  | 63069849  | T                    | C | ANGPTL3   | nonsyn SNV     | 0.36 | ANGPTL3:NM_014495:exon6:c.T1141C:p.F381L             |
| LC-MBL_5     | LC-MBL | 3  | 183273170 | 183273170 | G                    | T | KLHL6     | nonsyn SNV     | 0.45 | KLHL6:NM_130446:exon1:c.C272A:p.A91D                 |
| LC-MBL_5     | LC-MBL | 9  | 123210220 | 123210220 | T                    | G | CDK5RAP2  | nonsyn SNV     | 0.46 | CDK5RAP2:NM_001272039:exon19:c.A2288C:p.E763A        |
| LC-MBL_5     | LC-MBL | 10 | 43089689  | 43089689  | G                    | C | ZNF33B    | nonsyn SNV     | 0.48 | ZNF33B:NM_006955:exon5:c.C709G:p.R237G               |
| LC-MBL_5     | LC-MBL | 12 | 33021968  | 33021968  | G                    | A | PKP2      | stopgain SNV   | 0.64 | PKP2:NM_001005242:exon4:c.C1063T:p.R355X             |
| LC-MBL_5     | LC-MBL | 14 | 105517528 | 105517528 | G                    | A | GPR132    | nonsyn SNV     | 0.50 | GPR132:NM_013345:exon4:c.C946T:p.R316C               |
| LC-MBL_5     | LC-MBL | 20 | 590434    | 590434    | C                    | A | TCF15     | nonsyn SNV     | 0.58 | TCF15:NM_004609:exon1:c.G448T:p.A150S                |
| LC-MBL_5     | LC-MBL | 22 | 39421294  | 39421294  | C                    | T | APOBEC3D  | nonsyn SNV     | 0.50 | APOBEC3D:NM_152426:exon3:c.C430T:p.R144W             |
| LC-MBL_6     | LC-MBL | 2  | 101604571 | 101604571 | A                    | - | NPAS2     | frameshift del | 0.42 | NPAS2:NM_002518:exon17:c.1660delA:p.S554fs           |
| LC-MBL_6     | LC-MBL | 8  | 11995033  | 11995033  | G                    | T | USP17L2   | nonsyn SNV     | 0.71 | USP17L2:NM_201402:exon1:c.C1237A:p.P413T             |
| LC-MBL_6     | LC-MBL | 9  | 77415255  | 77415255  | G                    | T | TRPM6     | nonsyn SNV     | 0.43 | TRPM6:NM_001177310:exon17:c.C2138A:p.P713H           |
| LC-MBL_6     | LC-MBL | 9  | 107288862 | 107288862 | G                    | A | OR13C4    | nonsyn SNV     | 0.40 | OR13C4:NM_001001919:exon1:c.C629T:p.P210L            |
| LC-MBL_6     | LC-MBL | 11 | 74347276  | 74347276  | G                    | A | POLD3     | nonsyn SNV     | 0.34 | POLD3:NM_006591:exon11:c.G1154A:p.R385H              |
| LC-MBL_6     | LC-MBL | 11 | 113101945 | 113101945 | G                    | A | NCAM1     | nonsyn SNV     | 0.47 | NCAM1:NM_001242607:exon11:c.G1117A:p.G373S           |
| LC-MBL_6     | LC-MBL | 12 | 94975570  | 94975570  | C                    | A | TMCC3     | nonsyn SNV     | 0.37 | TMCC3:NM_020698:exon2:c.G823T:p.A275S                |
| LC-MBL_6     | LC-MBL | 13 | 20716839  | 20716839  | G                    | A | GJA3      | nonsyn SNV     | 0.63 | GJA3:NM_021954:exon2:c.C589T:p.P197S                 |
| LC-MBL_6     | LC-MBL | 13 | 28498404  | 28498404  | G                    | C | PDX1      | nonsyn SNV     | 0.22 | PDX1:NM_000209:exon2:c.G418C:p.A140P                 |
| LC-MBL_6     | LC-MBL | 15 | 75499628  | 75499643  | CCAGAGGGC<br>ATGCCAG | - | C15orf39  | frameshift del | 0.27 | C15orf39:NM_015492:exon2:c.1239_1254del:p.413_418del |
| LC-MBL_6     | LC-MBL | 16 | 70708357  | 70708357  | C                    | A | MTSS1L    | nonsyn SNV     | 0.55 | MTSS1L:NM_138383:exon11:c.G905T:p.S302I              |
| LC-MBL_6     | LC-MBL | 19 | 42384965  | 42384965  | A                    | G | CD79A     | nonsyn SNV     | 0.53 | CD79A:NM_001783:exon5:c.A599G:p.E200G                |
| LC-MBL_6     | LC-MBL | 21 | 22910199  | 22910199  | A                    | G | NCAM2     | nonsyn SNV     | 0.45 | NCAM2:NM_004540:exon18:c.A2435G:p.E812G              |
| CLL_4-PMN    | PMN    | 22 | 29885644  | 29885644  | C                    | A | NEFH      | nonsyn SNV     | 0.18 | NEFH:NM_021076:exon4:c.C2015A:p.A672E                |
| CLL_5-PMN    | PMN    | 13 | 114783628 | 114783628 | A                    | C | RASA3     | nonsyn SNV     | 0.24 | RASA3:NM_007368:exon11:c.T1043G:p.V348G              |
| HC-MBL_5-PMN | PMN    | 3  | 8671350   | 8671350   | -                    | A | SSUH2     | frameshift ins | 0.19 | SSUH2:NM_001256748:exon7:c.587_588insT:p.T196fs      |
| HC-MBL_5-PMN | PMN    | 5  | 16703202  | 16703202  | A                    | C | MYO10     | nonsyn SNV     | 0.47 | MYO10:NM_012334:exon23:c.T2342G:p.L781R              |



|              |     |    |          |          |    |           |          |                   |      |                                                                |
|--------------|-----|----|----------|----------|----|-----------|----------|-------------------|------|----------------------------------------------------------------|
| HC-MBL_5-PMN | PMN | 22 | 29885552 | 29885553 | AA | -         | NEFH     | frameshift del    | 0.25 | NEFH:NM_021076:exon4:c.1923_1924del:p.641_642del               |
| HC-MBL_5-PMN | PMN | 22 | 29885554 | 29885554 | C  | T         | NEFH     | nonsyn SNV        | 0.25 | NEFH:NM_021076:exon4:c.C1925T:p.T642M                          |
| HC-MBL_5-PMN | PMN | 22 | 29885557 | 29885558 | AG | -         | NEFH     | frameshift del    | 0.25 | NEFH:NM_021076:exon4:c.1928_1929del:p.643_643del               |
| HC-MBL_5-PMN | PMN | 22 | 29885561 | 29885562 | GG | -         | NEFH     | frameshift del    | 0.25 | NEFH:NM_021076:exon4:c.1932_1933del:p.644_645del               |
| LC-MBL_1-PMN | PMN | 4  | 9213757  | 9213757  | G  | C         | USP17L10 | nonsyn SNV        | 0.11 | USP17L10:NM_001256852:exon1:c.G1375C:p.V459L                   |
| LC-MBL_3-PMN | PMN | 22 | 29885552 | 29885553 | AA | -         | NEFH     | frameshift del    | 0.16 | NEFH:NM_021076:exon4:c.1923_1924del:p.641_642del               |
| LC-MBL_3-PMN | PMN | 22 | 29885554 | 29885554 | C  | T         | NEFH     | nonsyn SNV        | 0.16 | NEFH:NM_021076:exon4:c.C1925T:p.T642M                          |
| LC-MBL_3-PMN | PMN | 22 | 29885557 | 29885558 | AG | -         | NEFH     | frameshift del    | 0.16 | NEFH:NM_021076:exon4:c.1928_1929del:p.643_643del               |
| LC-MBL_3-PMN | PMN | 22 | 29885561 | 29885562 | GG | -         | NEFH     | frameshift del    | 0.16 | NEFH:NM_021076:exon4:c.1932_1933del:p.644_645del               |
| LC-MBL_5-PMN | PMN | 4  | 88537069 | 88537069 | -  | GATAGCAGC | DSPP     | nonframeshift ins | 0.97 | DSPP:NM_014208:exon5:c.3255_3256insGATAGCAGC;p.S1085delinsSDSS |
| LC-MBL_6-PMN | PMN | 17 | 39305760 | 39305760 | C  | T         | KRTAP4-5 | nonsyn SNV        | 0.18 | KRTAP4-5:NM_033188:exon1:c.G260A:p.R87K                        |

**Table S7.** List of all samples included in the WGS analysis, the targeted re-sequencing analysis or both.

| Sample ID    | Entity | WGS and deep-sequencing analysis | Only WGS analysis | Only deep-sequencing analysis |
|--------------|--------|----------------------------------|-------------------|-------------------------------|
| CLL_1        | CLL    | ✓                                |                   |                               |
| CLL_2        | CLL    | ✓                                |                   |                               |
| CLL_3        | CLL    | ✓                                |                   |                               |
| CLL_4        | CLL    | ✓                                |                   |                               |
| CLL_5        | CLL    | ✓                                |                   |                               |
| CLL_6        | CLL    |                                  |                   | ✓                             |
| CLL_7        | CLL    |                                  |                   | ✓                             |
| HC-MBL_1     | HC-MBL | ✓                                |                   |                               |
| HC-MBL_2     | HC-MBL | ✓                                |                   |                               |
| HC-MBL_3     | HC-MBL | ✓                                |                   |                               |
| HC-MBL_4     | HC-MBL | ✓                                |                   |                               |
| HC-MBL_5     | HC-MBL | ✓                                |                   |                               |
| HC-MBL_6     | HC-MBL |                                  |                   | ✓                             |
| HC-MBL_7     | HC-MBL |                                  |                   | ✓                             |
| HC-MBL_8     | HC-MBL |                                  |                   | ✓                             |
| HC-MBL_9     | HC-MBL |                                  |                   | ✓                             |
| HC-MBL_10    | HC-MBL |                                  |                   | ✓                             |
| HC-MBL_11    | HC-MBL |                                  |                   | ✓                             |
| HC-MBL_12    | HC-MBL |                                  |                   | ✓                             |
| HC-MBL_13    | HC-MBL |                                  |                   | ✓                             |
| LC-MBL_1     | LC-MBL | ✓                                |                   |                               |
| LC-MBL_2     | LC-MBL | ✓                                |                   |                               |
| LC-MBL_3     | LC-MBL | ✓                                |                   |                               |
| LC-MBL_4     | LC-MBL |                                  | ✓                 |                               |
| LC-MBL_5     | LC-MBL | ✓                                |                   |                               |
| LC-MBL_6     | LC-MBL | ✓                                |                   |                               |
| LC-MBL_7     | LC-MBL |                                  |                   | ✓                             |
| LC-MBL_8     | LC-MBL |                                  |                   | ✓                             |
| LC-MBL_9     | LC-MBL |                                  |                   | ✓                             |
| CLL_1-PMN    | PMN    | ✓                                |                   |                               |
| CLL_2-PMN    | PMN    | ✓                                |                   |                               |
| CLL_4-PMN    | PMN    | ✓                                |                   |                               |
| CLL_6-PMN    | PMN    |                                  |                   | ✓                             |
| CLL_7-PMN    | PMN    |                                  |                   | ✓                             |
| HC-MBL_1-PMN | PMN    | ✓                                |                   |                               |
| HC-MBL_2-PMN | PMN    | ✓                                |                   |                               |
| HC-MBL_3-PMN | PMN    | ✓                                |                   |                               |
| HC-MBL_4-PMN | PMN    | ✓                                |                   |                               |
| HC-MBL_5-PMN | PMN    | ✓                                |                   |                               |

|               |     |   |   |   |
|---------------|-----|---|---|---|
| HC-MBL_6-PMN  | PMN |   |   | ✓ |
| HC-MBL_7-PMN  | PMN |   |   | ✓ |
| HC-MBL_9-PMN  | PMN |   |   | ✓ |
| HC-MBL_10-PMN | PMN |   |   | ✓ |
| HC-MBL_11-PMN | PMN |   |   | ✓ |
| HC-MBL_12-PMN | PMN |   |   | ✓ |
| HC-MBL_13-PMN | PMN |   |   | ✓ |
| LC-MBL_1-PMN  | PMN | ✓ |   |   |
| LC-MBL_2-PMN  | PMN | ✓ |   |   |
| LC-MBL_3-PMN  | PMN | ✓ |   |   |
| LC-MBL_4-PMN  | PMN |   | ✓ |   |
| LC-MBL_5-PMN  | PMN | ✓ |   |   |
| LC-MBL_6-PMN  | PMN | ✓ |   |   |
| LC-MBL_7-PMN  | PMN |   |   | ✓ |
| LC-MBL_8-PMN  | PMN |   |   | ✓ |

**Table S8.** High quality exonic variants identified by targeted re-sequencing.

| Sample ID    | Entity | Chr | Start     | End       | Ref_base | Var_base | Gene   | Exonic_type    | VAF   | Transcripts                               |
|--------------|--------|-----|-----------|-----------|----------|----------|--------|----------------|-------|-------------------------------------------|
| HC-MBL_2     | HC-MBL | 4   | 153249504 | 153249504 | C        | G        | FBXW7  | nonsyn SNV     | 11.56 | NM_001013415:exon8:c.G920C:p.W307S        |
| HC-MBL_2     | HC-MBL | 7   | 124532330 | 124532330 | G        | C        | POT1   | nonsyn SNV     | 6.73  | NM_015450:exon6:c.C114G:p.S38R            |
| HC-MBL_4     | HC-MBL | 9   | 139390649 | 139390650 | AG       | -        | NOTCH1 | frameshift del | 16.82 | NM_017617:exon34:c.7541_7542del:p.P2514fs |
| HC-MBL_5     | HC-MBL | 2   | 198266834 | 198266834 | T        | C        | SF3B1  | nonsyn SNV     | 1.05  | NM_012433:exon15:c.A2098G:p.K700E         |
| HC-MBL_5     | HC-MBL | 7   | 124537227 | 124537227 | T        | C        | POT1   | nonsyn SNV     | 4.27  | NM_015450:exon5:c.A1G:p.M1V               |
| HC-MBL_5-PMN | PMN    | 17  | 7577547   | 7577547   | C        | G        | TP53   | nonsyn SNV     | 2.77  | NM_001126115:exon3:c.G338C:p.G113A        |
| LC-MBL_3-PMN | PMN    | 11  | 108117798 | 108117798 | C        | T        | ATM    | nonsyn SNV     | 20.17 | NM_000051:exon8:c.C1009T:p.R337C          |

**Table S9.** Prioritized non-coding variants in our cohort using Funseq2.

| Sample | Entity | Chr | Position  | Ref base | Var base | GERP       | Gene                                                         | Cancer Gene              |
|--------|--------|-----|-----------|----------|----------|------------|--------------------------------------------------------------|--------------------------|
| CLL_1  | CLL    | 1   | 203275300 | T        | C        | -2,83      | BTG2(intr&prom)                                              | BTG2[DNA_repair]         |
| CLL_1  | CLL    | 1   | 203275399 | T        | A        | 1,4        | BTG2(intr&prom)                                              | BTG2[DNA_repair]         |
| CLL_1  | CLL    | 1   | 203275440 | T        | C        | -2,01      | BTG2(intr&prom)                                              | BTG2[DNA_repair]         |
| CLL_1  | CLL    | 3   | 186783656 | C        | T        | 0,361      | ST6GAL1(intr)                                                | -                        |
| CLL_1  | CLL    | 6   | 162170004 | C        | T        | -5,59      | PARK2(intr)                                                  | -                        |
| CLL_1  | CLL    | 12  | 122460851 | T        | C        | -4,55      | BCL7A(intr&prom)                                             | BCL7A[cancer]            |
| CLL_2  | CLL    | 1   | 214175915 | T        | G        | 1          | PROX1(intr)                                                  | -                        |
| CLL_2  | CLL    | 14  | 71243089  | A        | G        | 0,978      | MAP3K9(intr)                                                 | -                        |
| CLL_2  | CLL    | 16  | 21611962  | T        | C        | 2,17       | METTL9(intr&prom)                                            | -                        |
| CLL_3  | CLL    | 1   | 36622448  | C        | A        | -6,99      | MAP7D1(intr&prom)                                            | -                        |
| CLL_3  | CLL    | 1   | 203275722 | C        | T        | 2          | BTG2(intr&prom)                                              | BTG2[DNA_repair]         |
| CLL_3  | CLL    | 2   | 85732494  | G        | T        | 0,656      | CAPG(dis)MAT2A(dis)RNF181(dis)SFTPB(dis)VAMP5(dis)VAMP8(dis) | -                        |
| CLL_3  | CLL    | 3   | 23936126  | G        | A        | -          | NKIRAS1(intr)                                                | -                        |
| CLL_3  | CLL    | 3   | 186783539 | T        | A        | 0,597      | ST6GAL1(intr)                                                | -                        |
| CLL_3  | CLL    | 3   | 186783608 | C        | G        | 0,345      | ST6GAL1(intr)                                                | -                        |
| CLL_3  | CLL    | 3   | 186783685 | T        | A        | -0,496     | ST6GAL1(intr)                                                | -                        |
| CLL_3  | CLL    | 11  | 48041339  | T        | C        | -0,082     | PTPRJ(intr)                                                  | -                        |
| CLL_3  | CLL    | 15  | 45329320  | A        | G        | -1,49      | SORD(intr)                                                   | -                        |
| CLL_3  | CLL    | 16  | 74700936  | G        | A        | 4,17       | RFWD3(prom)                                                  | RFWD3[DNA_repair]        |
| CLL_3  | CLL    | 19  | 46464080  | A        | C        | 2,14       | NOVA2(intr)                                                  | -                        |
| CLL_4  | CLL    | 1   | 46993788  | G        | C        | 2,63       | UQCRH(dis)                                                   | -                        |
| CLL_4  | CLL    | 3   | 186783576 | G        | A        | 3,11       | ST6GAL1(intr)                                                | -                        |
| CLL_4  | CLL    | 3   | 186783579 | G        | A        | 0,048<br>6 | ST6GAL1(intr)                                                | -                        |
| CLL_4  | CLL    | 14  | 37667115  | C        | G        | -5,74      | MIPOL1(prom)                                                 | -                        |
| CLL_4  | CLL    | 18  | 60988085  | C        | T        | 0,502      | BCL2(prom)                                                   | BCL2[actionable][cancer] |
| CLL_5  | CLL    | 1   | 40847880  | A        | G        | 4,36       | SMAP2(intr)                                                  | -                        |
| CLL_5  | CLL    | 1   | 164741374 | A        | T        | 0,326      | PBX1(intr)                                                   | PBX1[cancer]             |
| CLL_5  | CLL    | 3   | 23936126  | G        | A        | -          | NKIRAS1(intr)                                                | -                        |
| CLL_5  | CLL    | 6   | 106773194 | C        | G        | 1,27       | ATG5(prom&UTR)                                               | -                        |
| CLL_5  | CLL    | 11  | 102189019 | C        | T        | 0,846      | BIRC3(intr)                                                  | BIRC3[cancer]            |
| CLL_5  | CLL    | 12  | 32832099  | T        | G        | 4,46       | DNM1L(prom)                                                  | -                        |

|          |        |    |           |   |   |            |                                                                                                       |                                       |
|----------|--------|----|-----------|---|---|------------|-------------------------------------------------------------------------------------------------------|---------------------------------------|
| CLL_5    | CLL    | 19 | 2051560   | C | T | 0,147      | MKNK2(prom)                                                                                           | -                                     |
| HC-MBL_1 | HC-MBL | 1  | 203275423 | C | G | 1,9        | BTG2(intr&prom)                                                                                       | BTG2[DNA_repair]                      |
| HC-MBL_1 | HC-MBL | 1  | 203275443 | T | C | 2,56       | BTG2(intr&prom)                                                                                       | BTG2[DNA_repair]                      |
| HC-MBL_1 | HC-MBL | 3  | 47823658  | G | C | -0,289     | SMARCC1(prom)                                                                                         | -                                     |
| HC-MBL_1 | HC-MBL | 3  | 47823668  | A | C | -1,7       | SMARCC1(prom)                                                                                         | -                                     |
| HC-MBL_1 | HC-MBL | 3  | 187462358 | A | G | -0,748     | BCL6(intr&prom)                                                                                       | BCL6[actionable][cancer]              |
| HC-MBL_1 | HC-MBL | 3  | 187462529 | G | C | 2,12       | BCL6(intr&prom)                                                                                       | BCL6[actionable][cancer]              |
| HC-MBL_1 | HC-MBL | 7  | 76178630  | C | T | -          | UPK3B(intr)                                                                                           | -                                     |
| HC-MBL_1 | HC-MBL | 7  | 158374412 | G | A | -0,326     | PTPRN2(intr)                                                                                          | -                                     |
| HC-MBL_1 | HC-MBL | 10 | 75654546  | G | A | -0,15      | ADK(dis)AP3M1(dis)C10orf55(dis)CAMK2G(dis)CHCHD1(dis)PLAU(dis)<br>SEC24C(dis)VCL(dis)                 | -                                     |
| HC-MBL_1 | HC-MBL | 17 | 74734053  | G | A | 2,57       | MFSD11(prom&UTR)                                                                                      | -                                     |
| HC-MBL_1 | HC-MBL | 19 | 14613558  | G | A | 1,36       | DNAJB1(dis)GIPC1(dis)MIR639(dis)PKN1(dis)TECR(dis)                                                    | -                                     |
| HC-MBL_1 | HC-MBL | 21 | 45066483  | T | A | -0,477     | HSF2BP(intr)                                                                                          | -                                     |
| HC-MBL_2 | HC-MBL | 1  | 21995326  | T | C | 0,467      | RAP1GAP(intr)                                                                                         | -                                     |
| HC-MBL_2 | HC-MBL | 3  | 126247887 | T | C | 2,33       | C3orf22(intr)CHST13(intr)                                                                             | -                                     |
| HC-MBL_3 | HC-MBL | 6  | 80657408  | G | A | -0,118     | ELOVL4(prom)                                                                                          | -                                     |
| HC-MBL_3 | HC-MBL | 7  | 44678984  | G | A | 0,263      | OGDH(intr)                                                                                            | -                                     |
| HC-MBL_3 | HC-MBL | 7  | 99067253  | G | A | -0,911     | ZNF789(prom)                                                                                          | -                                     |
| HC-MBL_3 | HC-MBL | 8  | 141521792 | C | T | -0,634     | AC1(intr&prom)                                                                                        | -                                     |
| HC-MBL_3 | HC-MBL | 11 | 69455341  | T | C | -2,41      | CCND1(prom)                                                                                           | CCND1[DNA_repair][actionable][cancer] |
| HC-MBL_3 | HC-MBL | 12 | 52890401  | G | A | -3,1       | IGFBP6(dis)KRT18(dis)KRT4(dis)KRT5(dis)KRT6A(dis)KRT6B(dis)KRT<br>6C(dis)KRT7(dis)KRT75(dis)KRT8(dis) | KRT5[DNA_repair]                      |
| HC-MBL_3 | HC-MBL | 15 | 72979375  | A | C | 0,066<br>5 | BBS4(intr)                                                                                            | -                                     |
| HC-MBL_3 | HC-MBL | 20 | 43975029  | G | A | 0,57       | SDC4(intr&prom)                                                                                       | SDC4[cancer]                          |
| HC-MBL_4 | HC-MBL | 1  | 154469618 | T | G | 5,43       | ADAR(dis)SHE(dis&intr)UBAP2L(dis)                                                                     | -                                     |
| HC-MBL_4 | HC-MBL | 10 | 14051939  | G | A | 1,89       | FRMD4A(intr&prom)                                                                                     | -                                     |
| HC-MBL_4 | HC-MBL | 10 | 73982763  | T | A | 0,331      | ANAPC16(intr&prom)ASCC1(dis)DDIT4(dis)SPOCK2(dis)                                                     | -                                     |
| HC-MBL_4 | HC-MBL | 11 | 102188518 | A | C | -4,89      | BIRC3(intr&prom)                                                                                      | BIRC3[cancer]                         |
| HC-MBL_4 | HC-MBL | 12 | 69754128  | A | G | -0,851     | YEATS4(intr&prom)                                                                                     | -                                     |
| HC-MBL_4 | HC-MBL | 14 | 69259281  | T | A | -2,12      | ZFP36L1(intr&prom)                                                                                    | -                                     |
| HC-MBL_4 | HC-MBL | 14 | 69259510  | T | A | 1,16       | ZFP36L1(intr&prom)                                                                                    | -                                     |
| HC-MBL_4 | HC-MBL | 14 | 96179957  | A | G | 0,314      | TCL1A(intr)                                                                                           | TCL1A[cancer]                         |
| HC-MBL_4 | HC-MBL | 16 | 75681654  | T | G | -4,17      | KARS(intr&prom)TERF2IP(prom)                                                                          | TERF2IP[DNA_repair]                   |
| HC-MBL_4 | HC-MBL | 18 | 4106601   | T | G | 2,44       | DLGAP1(intr)                                                                                          | -                                     |
| HC-MBL_4 | HC-MBL | 18 | 12328135  | G | A | 0,949      | TUBB6(intr)                                                                                           | -                                     |

|          |        |    |           |   |   |            |                                   |                          |
|----------|--------|----|-----------|---|---|------------|-----------------------------------|--------------------------|
| HC-MBL_4 | HC-MBL | 2  | 75381295  | C | T | -7,27      | TACR1(intr)                       | -                        |
| HC-MBL_4 | HC-MBL | 2  | 202646000 | C | T | 0,991      | ALS2(prom)                        | -                        |
| HC-MBL_4 | HC-MBL | 5  | 147051073 | T | C | 0,756      | JAKMIP2(intr)                     | -                        |
| HC-MBL_4 | HC-MBL | 8  | 38760365  | A | C | 1,15       | PLEKHA2(intr&prom)                | -                        |
| HC-MBL_4 | HC-MBL | 8  | 38760381  | A | G | -1,3       | PLEKHA2(intr&prom)                | -                        |
| HC-MBL_5 | HC-MBL | 3  | 58015823  | A | G | 1,54       | FLNB(intr)                        | -                        |
| HC-MBL_5 | HC-MBL | 4  | 16085748  | T | C | 0,845      | PROM1(prom&UTR)                   | -                        |
| HC-MBL_5 | HC-MBL | 9  | 5510779   | T | C | 0,082<br>4 | PDCD1LG2(UTR)                     | -                        |
| HC-MBL_5 | HC-MBL | 11 | 16377920  | G | T | 5,7        | SOX6(intr)                        | -                        |
| HC-MBL_5 | HC-MBL | 11 | 128425760 | G | C | -0,523     | ETS1(intr)                        | ETS1[DNA_repair]         |
| HC-MBL_5 | HC-MBL | 14 | 65149276  | A | G | 2,53       | GPX2(dis)HSPA2(dis)PLEKHG3(dis)   | -                        |
| HC-MBL_5 | HC-MBL | 17 | 7766319   | T | G | -4,06      | LSMD1(intr)                       | -                        |
| LC-MBL_1 | LC-MBL | 7  | 45925242  | C | T | 0,975      | IGFBP1(dis)                       | -                        |
| LC-MBL_2 | LC-MBL | 1  | 203275550 | C | G | 3,87       | BTG2(intr&prom)                   | BTG2[DNA_repair]         |
| LC-MBL_2 | LC-MBL | 1  | 203275574 | T | C | -4,78      | BTG2(intr&prom)                   | BTG2[DNA_repair]         |
| LC-MBL_2 | LC-MBL | 1  | 203275871 | A | G | -0,234     | BTG2(intr&prom)                   | BTG2[DNA_repair]         |
| LC-MBL_2 | LC-MBL | 8  | 26307602  | C | A | -2,19      | BNIP3L(intr)                      | -                        |
| LC-MBL_2 | LC-MBL | 8  | 67686962  | T | G | -5,34      | C8orf44-SGK3(intr)SGK3(intr&prom) | -                        |
| LC-MBL_2 | LC-MBL | 17 | 1968643   | C | G | -0,983     | SMG6(intr)                        | -                        |
| LC-MBL_2 | LC-MBL | 19 | 17634108  | C | G | -2,06      | FAM129C(prom)                     | -                        |
| LC-MBL_2 | LC-MBL | 22 | 47365593  | C | T | -3,23      | TBC1D22A(intr)                    | -                        |
| LC-MBL_2 | LC-MBL | 22 | 47365682  | T | C | -0,722     | TBC1D22A(intr)                    | -                        |
| LC-MBL_3 | LC-MBL | 5  | 133860532 | G | A | 1,74       | PHF15(intr&prom)                  | -                        |
| LC-MBL_3 | LC-MBL | 5  | 134094201 | C | T | -2,29      | DDX46(prom)                       | -                        |
| LC-MBL_3 | LC-MBL | 5  | 149184640 | C | T | 0,192      | PPARGC1B(intr)                    | -                        |
| LC-MBL_3 | LC-MBL | 6  | 11368027  | T | A | 1,41       | NEDD9(intr)                       | -                        |
| LC-MBL_3 | LC-MBL | 16 | 67260703  | A | C | 0,19       | LRRRC29(prom&UTR)                 | -                        |
| LC-MBL_3 | LC-MBL | 22 | 41252751  | C | T | 5,15       | ST13(prom&UTR)                    | -                        |
| LC-MBL_4 | LC-MBL | 3  | 187462700 | G | A | 4,27       | BCL6(intr&prom)                   | BCL6[actionable][cancer] |
| LC-MBL_4 | LC-MBL | 3  | 187463529 | A | G | 2,11       | BCL6(prom)                        | BCL6[actionable][cancer] |
| LC-MBL_4 | LC-MBL | 3  | 187463764 | G | A | 4,53       | BCL6(prom)                        | BCL6[actionable][cancer] |
| LC-MBL_4 | LC-MBL | 6  | 34100411  | T | C | -4,84      | GRM4(intr)                        | -                        |
| LC-MBL_4 | LC-MBL | 9  | 20462552  | C | A | -0,344     | MLLT3(intr)                       | MLLT3[cancer]            |
| LC-MBL_5 | LC-MBL | 6  | 91005922  | T | G | 4,04       | BACH2(intr&prom)                  | -                        |

|          |        |    |           |   |   |        |                                 |                    |
|----------|--------|----|-----------|---|---|--------|---------------------------------|--------------------|
| LC-MBL_5 | LC-MBL | 8  | 28266617  | T | C | -0,225 | FBXO16(intr)ZNF395(dis)         | -                  |
| LC-MBL_5 | LC-MBL | 12 | 57078170  | G | C | 2,28   | PTGES3(intr&prom)               | -                  |
| LC-MBL_5 | LC-MBL | X  | 119006091 | T | A | -1,19  | NDUFA1(intr)RNF113A(prom)       | -                  |
| LC-MBL_6 | LC-MBL | 2  | 225450786 | T | C | -1,05  | CUL3(prom)                      | -                  |
| LC-MBL_6 | LC-MBL | 4  | 103748140 | A | G | -0,842 | UBE2D3(prom&UTR)                | UBE2D3[DNA_repair] |
| LC-MBL_6 | LC-MBL | 7  | 30265449  | C | T | 1,11   | C7orf41(dis)GARS(dis)ZNRF2(dis) | -                  |
| LC-MBL_6 | LC-MBL | 11 | 96000836  | G | A | 1,28   | MAML2(dis&intr)                 | MAML2[cancer]      |



**Table S10.** List of NCV targeting TF binding sites resulting in a motif-breaking event.

| Entity | Chr | Position  | Ref base | Var base | Gene                                                                                              | Motif-breaking                                                                                                                                                                                                                                          |
|--------|-----|-----------|----------|----------|---------------------------------------------------------------------------------------------------|---------------------------------------------------------------------------------------------------------------------------------------------------------------------------------------------------------------------------------------------------------|
| CLL    | 6   | 162170004 | C        | T        | PARK2(intr)                                                                                       | CTCF,CTCF,LDHS,RAD21,SMC3                                                                                                                                                                                                                               |
| CLL    | 12  | 122460851 | T        | C        | BCL7A(intr&prom)                                                                                  | DHS,ZBTB7A                                                                                                                                                                                                                                              |
| CLL    | 1   | 214175915 | T        | G        | PROX1(intr)                                                                                       | FOS,JUN,JUND,NR3C1                                                                                                                                                                                                                                      |
| CLL    | 14  | 71243089  | A        | G        | MAP3K9(intr)                                                                                      | DHS,PBX3                                                                                                                                                                                                                                                |
| CLL    | 16  | 21611962  | T        | C        | METTL9(intr&prom)                                                                                 | CEBPB,CTCF,DHS,STAT3                                                                                                                                                                                                                                    |
| CLL    | 1   | 36622448  | C        | A        | MAP7D1(intr&prom)                                                                                 | CCNT2,CHD2,DHS,MAX,SIN3A,USF1,USF2                                                                                                                                                                                                                      |
| CLL    | 1   | 203275722 | C        | T        | BTG2(intr&prom)                                                                                   | CTCF,DHS,EBF1,GATA1,GATA2,GATA3,MX1,STAT1,STAT3,TBP,TRIM28,WRNIP1                                                                                                                                                                                       |
| CLL    | 11  | 48041339  | T        | C        | PTPRJ(intr)                                                                                       | DHS,GATA1                                                                                                                                                                                                                                               |
| CLL    | 15  | 45329320  | A        | G        | SORD(intr)                                                                                        | CTCF,IRF4,MAX,RAD21,SMC3,SP1,YY1                                                                                                                                                                                                                        |
| CLL    | 16  | 74700936  | G        | A        | RFWD3(prom)                                                                                       | CHD2,DHS,E2F1,E2F4,ELF1,ELK4,FOS,FOSL2,GABPA,GATA1,IRF1,IRF3,MAX,NFYA,NFYB,PBX3,RFX5,SIX5,SP1,SP2,TBP,YY1                                                                                                                                               |
| CLL    | 19  | 46464080  | A        | C        | NOVA2(intr)                                                                                       | CTCF,CTCF,LDHS,JUND,NANOG,POU2F2,POU5F1,RAD21,SP1,TCF12                                                                                                                                                                                                 |
| CLL    | 1   | 46993788  | G        | C        | UQCRH(dis)                                                                                        | CEBPB,CTCF,EGR1,ELF1,FOS,FOSL1,GTFF2F1,HDAC2,HMG3,JUN,JUNB,JUND,MAX,MYC,PAX5,RAD21,SMC3,SP1,STAT2,YY1,ZNF143,ZNF263                                                                                                                                     |
| CLL    | 14  | 37667115  | C        | G        | MIPO1(prom)                                                                                       | CCNT2,DHS,E2F1,E2F6,HDAC2,HMG3,MAX,MYC,NRF1,STAT2,TAF1,TBP,TFAP2C,USF1,ZBTB7A,ZNF263                                                                                                                                                                    |
| CLL    | 18  | 60988085  | C        | T        | BCL2(prom)                                                                                        | CTCF,DHS,EBF1,EGR1,FOXA1,NFKB1,TAF1,ZEB1                                                                                                                                                                                                                |
| CLL    | 1   | 40847880  | A        | G        | SMAP2(intr)                                                                                       | DHS,JUNB                                                                                                                                                                                                                                                |
| CLL    | 1   | 164741374 | A        | T        | PBX1(intr)                                                                                        | CEBPB,DHS,EP300                                                                                                                                                                                                                                         |
| CLL    | 6   | 106773194 | C        | G        | ATG5(prom&UTR)                                                                                    | DHS,E2F1,EBF1,SMARCB1,TFAP2A,TFAP2C,YY1,ZNF263                                                                                                                                                                                                          |
| CLL    | 12  | 32832099  | T        | G        | DNM1L(prom)                                                                                       | CHD2,CTCF,DHS,EGR1,ELF1,ESR1,ETS1,GABPA,HMG3,IRF1,JUND,MAX,MYC,NFKB1,NRF1,PAX5,RFX5,SIX5,SP1,TAF1,TBP,TRIM28,USF1,YY1,ZBTB7A,ZEB1,ZNF143                                                                                                                |
| HC-MBL | 3   | 47823658  | G        | C        | SMARCC1(prom)                                                                                     | BATF,BCL11A,BCLAF1,E2F1,E2F6,EBF1,EGR1,ELF1,ELK4,HMG3,IRF4,JUNB,MAX,MEF2A,MEF2C,MYC,NFKB1,PAX5,POU2F2,REST,SP1,TAF1,TBP,TCF12,TCF7L2,TFAP2C,YY1                                                                                                         |
| HC-MBL | 3   | 47823668  | A        | C        | SMARCC1(prom)                                                                                     | BATF,BCL11A,BCLAF1,E2F1,E2F6,EBF1,EGR1,ELF1,ELK4,HMG3,IRF4,JUNB,MAX,MEF2A,MEF2C,MYC,NFKB1,PAX5,POU2F2,REST,SP1,TAF1,TBP,TCF12,TCF7L2,TFAP2C,YY1                                                                                                         |
| HC-MBL | 7   | 76178630  | C        | T        | UPK3B(intr)                                                                                       | DHS,E2F6,EGR1,ELF1,ELK4,GABPA,MAX,MYC,NFKB1,NRF1,PAX5,REST,SP1,STAT1,TAF1,ZNF263                                                                                                                                                                        |
| HC-MBL | 7   | 158374412 | G        | A        | PTPRN2(intr)                                                                                      | FOXA1,HNF4G                                                                                                                                                                                                                                             |
| HC-MBL | 10  | 75654546  | G        | A        | ADK(dis)AP3M1(dis)C10orf55(dis)CAMK2G(dis)CHCHD1(dis)PLAU(dis)SEC24C(dis)VCL(dis)                 | BATF,CEBPB,DHS,EBF1,EP300,FOS,FOSL1,GATA2,IRF4,JUN,JUND,SRF                                                                                                                                                                                             |
| HC-MBL | 17  | 74734053  | G        | A        | MFS11(prom&UTR)                                                                                   | ATF3,BATF,BCL3,BHLHE40,CCNT2,DHS,E2F1,E2F4,E2F6,ELF1,EP300,ETS1,FOS,FOSL1,FOSL2,GABPA,HMG3,JUN,JUNB,JUND,MAX,MYC,NFKB1,NRF1,PAX5,SIN3A,SIX5,SP1,SREBF1,SRF,TAF1,TBP,TCF12,TCF7L2,THAP1,TRIM28,USF1,USF2,YY1,ZBTB7A,ZNF143,ZNF263                        |
| HC-MBL | 19  | 14613558  | G        | A        | DNAJB1(dis)GIPC1(dis)MIR639(dis)PKN1(dis)TECR(dis)                                                | CEBPB,E2F1,EP300,FOXA1,FOXA2,GTFF2F1,JUN,JUND,MYC,NR3C1,RFX5,SMARCC1,STAT3,TFAP2A,USF2                                                                                                                                                                  |
| HC-MBL | 1   | 21995326  | T        | C        | RAP1GAP(intr)                                                                                     | CTCF,CTCF,LDHS,HMG3,SP1,ZBTB7A                                                                                                                                                                                                                          |
| HC-MBL | 3   | 126247887 | T        | C        | C3orf22(intr)CHST13(intr)                                                                         | ATF3,CEBPB,CTCF,DHS,EP300,FOXA1,FOXA2,HDAC2,HNF4A,HNF4G,MAX,RAD21,RXRA,SP1,TBP                                                                                                                                                                          |
| HC-MBL | 6   | 80657408  | G        | A        | ELOVL4(prom)                                                                                      | ATF3,DHS,E2F1,EGR1,MAX,NRF1,TBP,TCF12,USF1,ZNF263                                                                                                                                                                                                       |
| HC-MBL | 7   | 44678984  | G        | A        | OGDH(intr)                                                                                        | BATF,BCL11A,BCL3,BCLAF1,CEBPB,CHD2,CTCF,DHS,EBF1,EGR1,ELF1,ELK4,EP300,ETS1,FOS,FOSL1,FOSL2,GABPA,GATA2,GTFF2F1,IRF4,JUN,JUNB,JUND,MAX,MEF2A,MEF2C,NFKB1,PAX5,POU2F2,RAD21,SIN3A,SIX5,SMARCB1,SMARCC1,SMC3,SP1,SP1,TAF1,TBP,TCF12,TCF7L2,TFAP2C,YY1,ZEB1 |
| HC-MBL | 7   | 99067253  | G        | A        | ZNF789(prom)                                                                                      | DHS,TBP,USF1                                                                                                                                                                                                                                            |
| HC-MBL | 8   | 141521792 | C        | T        | AC1(intr&prom)                                                                                    | CCNT2,DHS,E2F1,EBF1,EGR1,PAX5,TAF1                                                                                                                                                                                                                      |
| HC-MBL | 11  | 69455341  | T        | C        | CCND1(prom)                                                                                       | E2F1,TCF7L2                                                                                                                                                                                                                                             |
| HC-MBL | 12  | 52890401  | G        | A        | IGFBP6(dis)KRT18(dis)KRT4(dis)KRT5(dis)KRT6A(dis)KRT6B(dis)KRT6C(dis)KRT7(dis)KRT75(dis)KRT8(dis) | DHS,NR3C1,SIN3A                                                                                                                                                                                                                                         |
| HC-MBL | 15  | 72979375  | A        | C        | BBS4(intr)                                                                                        | DHS,E2F1                                                                                                                                                                                                                                                |
| HC-MBL | 20  | 43975029  | G        | A        | SDC4(intr&prom)                                                                                   | DHS,MYC,SMARCB1,TFAP2C,ZBTB7A                                                                                                                                                                                                                           |
| HC-MBL | 1   | 154469618 | T        | G        | ADAR(dis)SHE(dis&intr)UBAP2L(dis)                                                                 | DHS,ELF1,FOS,GABPA,GATA2,HDAC2,HNF4A,MAX,PAX5,SP1,TAL1,ZBTB7A                                                                                                                                                                                           |
| HC-MBL | 2   | 75381295  | C        | T        | TACR1(intr)                                                                                       | BCL11A,CTCF,DHS,E2F1,ESR1,FOXA1,JUND,RAD21,SP1,TAF1                                                                                                                                                                                                     |
| HC-MBL | 2   | 202646000 | C        | T        | ALS2(prom)                                                                                        | ATF3,BCRA1,E2F1,ELF1,JUN,JUND,PRDM1,RFX5,SIN3A,SP1,SRF,TAF1,TBP,TCF7L2,YY1,ZNF263                                                                                                                                                                       |
| HC-MBL | 5   | 147051073 | T        | C        | JAKMIP2(intr)                                                                                     | EP300,FOXA1,FOXA2,HNF4A,HNF4G,SP1                                                                                                                                                                                                                       |
| HC-MBL | 10  | 14051939  | G        | A        | FRMD4A(intr&prom)                                                                                 | BCL11A,DHS,NFKB1,PAX5                                                                                                                                                                                                                                   |
| HC-MBL | 10  | 73982763  | T        | A        | ANAPC16(intr&prom)ASCC1(dis)DDIT4(dis)SPOCK2(dis)                                                 | CTCF,DHS,MEF2A,RAD21,SMC3                                                                                                                                                                                                                               |

|        |    |           |   |   |                                   |                                                                                                                                             |
|--------|----|-----------|---|---|-----------------------------------|---------------------------------------------------------------------------------------------------------------------------------------------|
| HC-MBL | 12 | 69754128  | A | G | YEATS4(intr&prom)                 | E2F1,EBF1,EGR1,ETS1,FOXA1,FOXA2,GATA1,UTF2B,UTF2F1,MX1,MYC,NFKB1,PBX3,SIN3A,SP1,TAF1,TBP,YY1                                                |
| HC-MBL | 14 | 69259281  | T | A | ZFP36L1(intr&prom)                | EBF1                                                                                                                                        |
| HC-MBL | 16 | 75681654  | T | G | KARS(intr&prom)TERF2IP(prom)      | CCNT2,DHS,E2F1,EGR1,ELF1,ETS1,FOSL2,GABPA,UTF2F1,IRF1,MYC,NFKB1,NR2C2,NRF1,PAX5,REST,SIN3A,SIX5,SP1,TAF1,TAF7,TBP,TRIM28,YY1                |
| HC-MBL | 18 | 4106601   | T | G | DLGAP1(intr)                      | CTCF,DHS,RAD21,SMC3                                                                                                                         |
| HC-MBL | 18 | 12328135  | G | A | TUBB6(intr)                       | CEBPB,CTCF,CTCF,DHS,EBF1,ELF1,GABPA,MAX,MYC,RAD21,SIN3A,SMC3,SP1,TCF12,TFAP2A,TFAP2C,YY1,ZNF143                                             |
| HC-MBL | 4  | 16085748  | T | C | PROM1(prom&UTR)                   | DHS,REST,TAF1,TBP                                                                                                                           |
| HC-MBL | 9  | 5510779   | T | C | PDCD1LG2(UTR)                     | CHD2,DHS,TBP                                                                                                                                |
| HC-MBL | 11 | 16377920  | G | T | SOX6(intr)                        | FOXA1,RAD21                                                                                                                                 |
| HC-MBL | 11 | 128425760 | G | C | ETS1(intr)                        | CTCF,DHS,RAD21                                                                                                                              |
| HC-MBL | 17 | 7766319   | T | G | LSMD1(intr)                       | CTCF,NFKB1                                                                                                                                  |
| LC-MBL | 7  | 45925242  | C | T | IGFBP1(dis)                       | CEBPB,DHS,EP300,FOSL2,FOXA1,FOXA2,UTF2F1,HDAC2,HNF4A,HNF4G,JUN,JUND,NR3C1,RFX5,RXRA,SMC3,SP1,STAT3,TCF12,TCF7L2,ZBTB33                      |
| LC-MBL | 1  | 203275574 | T | C | BTG2(intr&prom)                   | CCNT2,DHS,E2F6,EGR1,ETS1,GATA1,GATA2,GATA3,JUN,JUND,MAX,MYC,REST,SIRT6,STAT1,STAT3,TAF1,TAL1,USF1,WRNIP1,ZBTB7A                             |
| LC-MBL | 8  | 26307602  | C | A | BNIP3L(intr)                      | GATA2,ZBTB7A                                                                                                                                |
| LC-MBL | 8  | 67686962  | T | G | C8orf44-SGK3(intr)SGK3(intr&prom) | E2F1,TAF1                                                                                                                                   |
| LC-MBL | 17 | 1968643   | C | G | SMG6(intr)                        | CTCF,ELF1                                                                                                                                   |
| LC-MBL | 22 | 47365593  | C | T | TBC1D22A(intr)                    | BATF,BCL11A,BCL3,DHS,EBF1,EGR1,ELF1,IRF4,MEF2A,NFKB1,PAX5,POU2F2,RAD21,SP1,TCF12,ZBTB33                                                     |
| LC-MBL | 22 | 47365682  | T | C | TBC1D22A(intr)                    | BATF,BCL11A,BCL3,DHS,EBF1,EGR1,ELF1,IRF4,MEF2A,NFKB1,PAX5,POU2F2,SP1,TCF12,ZBTB33                                                           |
| LC-MBL | 5  | 133860532 | G | A | PHF15(intr&prom)                  | E2F1,TFAP2A,TFAP2C                                                                                                                          |
| LC-MBL | 5  | 134094201 | C | T | DDX46(prom)                       | E2F1,E2F4,E2F6,GATA1,HMG3,IRF1,MAX,NFKB1,PAX5,STAT1,STAT3,TAF1,TRIM28                                                                       |
| LC-MBL | 6  | 11368027  | T | A | NEDD9(intr)                       | CEBPB,DHS,EBF1,EP300,FOSL2,FOXA1,HDAC2,HNF4A,JUND,RAD21,RXRA,SP1,SRF,TBP,TCF7L2                                                             |
| LC-MBL | 16 | 67260703  | A | C | LRRC29(prom&UTR)                  | CTCF,GATA1,HMG3,TFAP2C                                                                                                                      |
| LC-MBL | 22 | 41252751  | C | T | ST13(prom&UTR)                    | CTCF,DHS,EP300,ETS1,GATA1,HSF1,MAX,MYC,NRF1,PPARGC1A,TAF1,TBP,USF1,USF2,ZNF263                                                              |
| LC-MBL | 3  | 187463529 | A | G | BCL6(prom)                        | ATF3,BRCA1,DHS,EGR1,EP300,FOXA1,UTF2B,HDAC2,IRF1,JUND,MAX,NFE2,REST,RFX5,SIX5,SMARCC2,SP1,STAT1,STAT3,TAF1,TAF7,TBP,TCF7L2,TRIM28,USF1,USF2 |
| LC-MBL | 3  | 187463764 | G | A | BCL6(prom)                        | DHS,EP300,UTF2B,HDAC2,STAT1,TBP,ZBTB7A                                                                                                      |
| LC-MBL | 9  | 20462552  | C | A | MLLT3(intr)                       | CTCF,DHS,RAD21                                                                                                                              |
| LC-MBL | 8  | 28266617  | T | C | FBXO16(intr)ZNF395(dis)           | DHS,FOXA1                                                                                                                                   |
| LC-MBL | 12 | 57078170  | G | C | PTGES3(intr&prom)                 | DHS,HNF4A,HNF4G,MEF2A,SIN3A,SP1,SP1                                                                                                         |
| LC-MBL | X  | 119006091 | T | A | NDUFA1(intr)RNF113A(prom)         | CEBPB,DHS,GABPA                                                                                                                             |
| LC-MBL | 2  | 225450786 | T | C | CUL3(prom)                        | DHS,STAT1,TBP,TRIM28,ZNF263                                                                                                                 |
| LC-MBL | 7  | 30265449  | C | T | C7orf41(dis)GARS(dis)ZNR2(dis)    | DHS,GATA2                                                                                                                                   |
| LC-MBL | 11 | 96000836  | G | A | MAML2(dis&intr)                   | BCL11A,DHS,IRF4,NFKB1,PAX5,RAD21,SMC3                                                                                                       |

**Table S11.** Pathway enrichment analysis of transcription factors that were implicated in the NVC-induced TF motif breaks in the MBL and ultra-stable CLL cohort.

| Cohort                | Database   | Signaling pathways | Adjusted P-value | Genes                                                                                                          |
|-----------------------|------------|--------------------|------------------|----------------------------------------------------------------------------------------------------------------|
| MBL, ultra stable CLL | KEGG       | MAPK               | 0.00004398       | <i>ELK4, JUN, MEF2C, JUND, MAX, MYC, SRF, FOS, NFKB1</i>                                                       |
|                       | NCI-Nature | AP-1               | 1.165e-22        | <i>EGR1, TCF7L2, JUN, JUND, FOS, NR3C1, GATA2, ESR1, ETS1, FOSL2, FOSL1, ELF1, SP1, MYC, EP300, JUNB, ATF3</i> |
|                       | Panther    | WNT                | 0.001385         | <i>TCFL2, SMARCC1, HDAC2, SMARCB1, SMARCC2, MYC, EP300</i>                                                     |
|                       | BioCarta   | MAPK               | 9.649e-9         | <i>MEF2A, JUN, MEF2C, SP1, STAT1, MAX, MYC, FOS</i>                                                            |

**Table S12.** List of non-recurrent shared NCV between MBL/CLL and PMN samples.

| Sample ID | Entity | Chr            | Start   | End     | Reference_base | Variant_base             | Gene                                             | Type           | Var. ratio% | depth |
|-----------|--------|----------------|---------|---------|----------------|--------------------------|--------------------------------------------------|----------------|-------------|-------|
| HC-MBL_3  | HC-MBL | chrUn_gl000216 | 20780   | 20780   | C              | A                        | NONE(dist=NONE),NONE(dist=NONE)                  | intergenic     | 0.21        | 170   |
| HC-MBL_3  | PMN    | chrUn_gl000216 | 20780   | 20780   | C              | A                        | NONE(dist=NONE),NONE(dist=NONE)                  | intergenic     | 0.20        | 122   |
| LC-MBL_1  | LC-MBL | chrUn_gl000225 | 31493   | 31493   | C              | T                        | NONE(dist=NONE),NONE(dist=NONE)                  | intergenic     | 0.26        | 34    |
| LC-MBL_1  | PMN    | chrUn_gl000225 | 31493   | 31493   | C              | T                        | NONE(dist=NONE),NONE(dist=NONE)                  | intergenic     | 0.25        | 36    |
| CLL_4     | CLL    | chr17          | 57565   | 57565   | G              | C                        | DOC2B(dist=26145),RPH3AL(dist=4615)              | intergenic     | 0.48        | 35    |
| CLL_4     | PMN    | chr17          | 57565   | 57565   | G              | C                        | DOC2B(dist=26145),RPH3AL(dist=4615)              | intergenic     | 0.23        | 38    |
| LC-MBL_1  | LC-MBL | chrUn_gl000211 | 59603   | 59603   | -              | TA                       | FLJ43315                                         | ncRNA_intronic | 0.40        | 44    |
| LC-MBL_1  | PMN    | chrUn_gl000211 | 59603   | 59603   | -              | TA                       | FLJ43315                                         | ncRNA_intronic | 0.35        | 60    |
| LC-MBL_6  | LC-MBL | chrUn_gl000225 | 198000  | 198000  | A              | G                        | NONE(dist=NONE),NONE(dist=NONE)                  | intergenic     | 0.25        | 66    |
| LC-MBL_6  | PMN    | chrUn_gl000225 | 198000  | 198000  | A              | G                        | NONE(dist=NONE),NONE(dist=NONE)                  | intergenic     | 0.34        | 69    |
| HC-MBL_2  | HC-MBL | chr12          | 1496286 | 1496287 | CC             | -                        | ERC1                                             | intronic       | 0.28        | 49    |
| HC-MBL_2  | PMN    | chr12          | 1496286 | 1496287 | CC             | -                        | ERC1                                             | intronic       | 0.26        | 34    |
| HC-MBL_2  | HC-MBL | chr12          | 1496291 | 1496291 | T              | G                        | ERC1                                             | intronic       | 0.28        | 49    |
| HC-MBL_2  | PMN    | chr12          | 1496291 | 1496291 | T              | G                        | ERC1                                             | intronic       | 0.26        | 34    |
| HC-MBL_2  | HC-MBL | chr12          | 1496294 | 1496295 | CT             | -                        | ERC1                                             | intronic       | 0.28        | 49    |
| HC-MBL_2  | PMN    | chr12          | 1496294 | 1496295 | CT             | -                        | ERC1                                             | intronic       | 0.26        | 34    |
| CLL_5     | CLL    | chr19          | 4085791 | 4085791 | G              | C                        | ZBTB7A(dist=18975),MAP2K2(dist=4529)             | intergenic     | 0.29        | 31    |
| CLL_5     | PMN    | chr19          | 4085791 | 4085791 | G              | C                        | ZBTB7A(dist=18975),MAP2K2(dist=4529)             | intergenic     | 0.25        | 35    |
| CLL_5     | CLL    | chr19          | 4085794 | 4085799 | GGAGGG         | -                        | ZBTB7A(dist=18978),MAP2K2(dist=4521)             | intergenic     | 0.29        | 31    |
| CLL_5     | PMN    | chr19          | 4085794 | 4085799 | GGAGGG         | -                        | ZBTB7A(dist=18978),MAP2K2(dist=4521)             | intergenic     | 0.25        | 35    |
| CLL_5     | CLL    | chr19          | 4085801 | 4085801 | A              | C                        | ZBTB7A(dist=18985),MAP2K2(dist=4519)             | intergenic     | 0.29        | 31    |
| CLL_5     | PMN    | chr19          | 4085801 | 4085801 | A              | C                        | ZBTB7A(dist=18985),MAP2K2(dist=4519)             | intergenic     | 0.25        | 35    |
| CLL_5     | CLL    | chr19          | 4085804 | 4085804 | G              | C                        | ZBTB7A(dist=18988),MAP2K2(dist=4516)             | intergenic     | 0.29        | 31    |
| CLL_5     | PMN    | chr19          | 4085804 | 4085804 | G              | C                        | ZBTB7A(dist=18988),MAP2K2(dist=4516)             | intergenic     | 0.25        | 35    |
| CLL_5     | CLL    | chr19          | 4085805 | 4085805 | G              | T                        | ZBTB7A(dist=18989),MAP2K2(dist=4515)             | intergenic     | 0.29        | 31    |
| CLL_5     | PMN    | chr19          | 4085805 | 4085805 | G              | T                        | ZBTB7A(dist=18989),MAP2K2(dist=4515)             | intergenic     | 0.25        | 35    |
| CLL_5     | CLL    | chr19          | 4085807 | 4085807 | A              | C                        | ZBTB7A(dist=18991),MAP2K2(dist=4513)             | intergenic     | 0.29        | 31    |
| CLL_5     | PMN    | chr19          | 4085807 | 4085807 | A              | C                        | ZBTB7A(dist=18991),MAP2K2(dist=4513)             | intergenic     | 0.25        | 35    |
| HC-MBL_1  | HC-MBL | chr2           | 4294004 | 4294004 | -              | GAATGGAATG<br>GAATGGAATG | LOC100505964(dist=272382),LOC727982(dist=381804) | intergenic     | 0.24        | 25    |
| HC-MBL_1  | PMN    | chr2           | 4294004 | 4294004 | -              | GAATGGAATG<br>GAATGGAATG | LOC100505964(dist=272382),LOC727982(dist=381804) | intergenic     | 0.45        | 24    |

|          |        |       |          |          |                                          |                                  |                                             |                |      |     |
|----------|--------|-------|----------|----------|------------------------------------------|----------------------------------|---------------------------------------------|----------------|------|-----|
| LC-MBL_4 | LC-MBL | chr17 | 5110984  | 5110984  | G                                        | A                                | LOC100130950                                | ncRNA_intronic | 0.11 | 18  |
| LC-MBL_4 | PMN    | chr17 | 5110984  | 5110984  | G                                        | A                                | LOC100130950                                | ncRNA_intronic | 0.16 | 25  |
| LC-MBL_4 | LC-MBL | chr17 | 5110987  | 5110987  | G                                        | A                                | LOC100130950                                | ncRNA_intronic | 0.11 | 18  |
| LC-MBL_4 | PMN    | chr17 | 5110987  | 5110987  | G                                        | A                                | LOC100130950                                | ncRNA_intronic | 0.16 | 25  |
| LC-MBL_4 | LC-MBL | chr17 | 5110989  | 5110989  | G                                        | A                                | LOC100130950                                | ncRNA_intronic | 0.11 | 18  |
| LC-MBL_4 | PMN    | chr17 | 5110989  | 5110989  | G                                        | A                                | LOC100130950                                | ncRNA_intronic | 0.16 | 25  |
| LC-MBL_4 | LC-MBL | chr17 | 5110992  | 5110992  | G                                        | T                                | LOC100130950                                | ncRNA_intronic | 0.11 | 18  |
| LC-MBL_4 | PMN    | chr17 | 5110992  | 5110992  | G                                        | T                                | LOC100130950                                | ncRNA_intronic | 0.16 | 25  |
| LC-MBL_4 | LC-MBL | chr17 | 5110993  | 5110993  | G                                        | A                                | LOC100130950                                | ncRNA_intronic | 0.11 | 18  |
| LC-MBL_4 | PMN    | chr17 | 5110993  | 5110993  | G                                        | A                                | LOC100130950                                | ncRNA_intronic | 0.16 | 25  |
| LC-MBL_4 | LC-MBL | chr17 | 5110997  | 5110997  | T                                        | C                                | LOC100130950                                | ncRNA_intronic | 0.11 | 18  |
| LC-MBL_4 | PMN    | chr17 | 5110997  | 5110997  | T                                        | C                                | LOC100130950                                | ncRNA_intronic | 0.16 | 25  |
| CLL_2    | CLL    | chr19 | 8792819  | 8792819  | -                                        | CATTCACCCAC<br>TCATT             | ADAMTS10(dist=117231),ACTL9(dist=14932)     | intergenic     | 0.36 | 52  |
| CLL_2    | PMN    | chr19 | 8792819  | 8792819  | -                                        | CATTCACCCAC<br>TCATT             | ADAMTS10(dist=117231),ACTL9(dist=14932)     | intergenic     | 0.38 | 26  |
| CLL_4    | CLL    | chr1  | 9134211  | 9134211  | A                                        | G                                | SLC2A5(dist=4324),GPR157(dist=30265)        | intergenic     | 0.36 | 25  |
| CLL_4    | PMN    | chr1  | 9134211  | 9134211  | A                                        | G                                | SLC2A5(dist=4324),GPR157(dist=30265)        | intergenic     | 0.26 | 23  |
| CLL_4    | CLL    | chr21 | 9997440  | 9997440  | A                                        | G                                | TEKT4P2(dist=28847),TPTE(dist=909303)       | intergenic     | 0.44 | 36  |
| CLL_4    | PMN    | chr21 | 9997440  | 9997440  | A                                        | G                                | TEKT4P2(dist=28847),TPTE(dist=909303)       | intergenic     | 0.56 | 25  |
| LC-MBL_5 | LC-MBL | chr20 | 10856216 | 10856247 | AGGCCATGATTC<br>AATCTGAGCCTA<br>GGCCTCAG | -                                | JAG1(dist=201522),LOC339593(dist=391060)    | intergenic     | 0.52 | 50  |
| LC-MBL_5 | PMN    | chr20 | 10856216 | 10856247 | AGGCCATGATTC<br>AATCTGAGCCTA<br>GGCCTCAG | -                                | JAG1(dist=201522),LOC339593(dist=391060)    | intergenic     | 0.48 | 62  |
| CLL_4    | CLL    | chr6  | 13403204 | 13403204 | T                                        | C                                | GFOD1                                       | intronic       | 0.53 | 49  |
| CLL_4    | PMN    | chr6  | 13403204 | 13403204 | T                                        | C                                | GFOD1                                       | intronic       | 0.16 | 59  |
| CLL_2    | CLL    | chr18 | 14921306 | 14921316 | CAACCAGCAGA                              | -                                | ANKRD30B(dist=68569),LOC644669(dist=392239) | intergenic     | 0.41 | 123 |
| CLL_2    | PMN    | chr18 | 14921306 | 14921316 | CAACCAGCAGA                              | -                                | ANKRD30B(dist=68569),LOC644669(dist=392239) | intergenic     | 0.53 | 39  |
| CLL_2    | CLL    | chr18 | 14921321 | 14921321 | G                                        | T                                | ANKRD30B(dist=68584),LOC644669(dist=392234) | intergenic     | 0.30 | 134 |
| CLL_2    | PMN    | chr18 | 14921321 | 14921321 | G                                        | T                                | ANKRD30B(dist=68584),LOC644669(dist=392234) | intergenic     | 0.37 | 37  |
| LC-MBL_5 | LC-MBL | chr11 | 15231917 | 15231917 | -                                        | GCCTGTTCTGT<br>GGGCTACAGA<br>CAT | INSC                                        | intronic       | 0.33 | 30  |
| LC-MBL_5 | PMN    | chr11 | 15231917 | 15231917 | -                                        | GCCTGTTCTGT<br>GGGCTACAGA<br>CAT | INSC                                        | intronic       | 0.40 | 37  |
| LC-MBL_4 | LC-MBL | chr3  | 16035091 | 16035091 | G                                        | T                                | MIR563(dist=119735),GALNT15(dist=181093)    | intergenic     | 0.21 | 23  |
| LC-MBL_4 | PMN    | chr3  | 16035091 | 16035091 | G                                        | T                                | MIR563(dist=119735),GALNT15(dist=181093)    | intergenic     | 0.54 | 11  |
| LC-MBL_4 | LC-MBL | chr3  | 16035092 | 16035092 | A                                        | T                                | MIR563(dist=119736),GALNT15(dist=181092)    | intergenic     | 0.21 | 23  |

|          |        |       |          |          |     |                                    |                                          |            |      |     |
|----------|--------|-------|----------|----------|-----|------------------------------------|------------------------------------------|------------|------|-----|
| LC-MBL_4 | PMN    | chr3  | 16035092 | 16035092 | A   | T                                  | MIR563(dist=119736),GALNT15(dist=181092) | intergenic | 0.54 | 11  |
| LC-MBL_4 | LC-MBL | chr10 | 16445777 | 16445777 | A   | C                                  | FAM188A(dist=543258),PTER(dist=33165)    | intergenic | 0.17 | 51  |
| LC-MBL_4 | PMN    | chr10 | 16445777 | 16445777 | A   | C                                  | FAM188A(dist=543258),PTER(dist=33165)    | intergenic | 0.21 | 46  |
| LC-MBL_4 | LC-MBL | chr10 | 16445778 | 16445778 | G   | T                                  | FAM188A(dist=543259),PTER(dist=33164)    | intergenic | 0.17 | 51  |
| LC-MBL_4 | PMN    | chr10 | 16445778 | 16445778 | G   | T                                  | FAM188A(dist=543259),PTER(dist=33164)    | intergenic | 0.21 | 46  |
| LC-MBL_4 | LC-MBL | chr10 | 16445779 | 16445779 | A   | T                                  | FAM188A(dist=543260),PTER(dist=33163)    | intergenic | 0.17 | 51  |
| LC-MBL_4 | PMN    | chr10 | 16445779 | 16445779 | A   | T                                  | FAM188A(dist=543260),PTER(dist=33163)    | intergenic | 0.21 | 46  |
| LC-MBL_4 | LC-MBL | chr10 | 16445780 | 16445780 | G   | T                                  | FAM188A(dist=543261),PTER(dist=33162)    | intergenic | 0.17 | 51  |
| LC-MBL_4 | PMN    | chr10 | 16445780 | 16445780 | G   | T                                  | FAM188A(dist=543261),PTER(dist=33162)    | intergenic | 0.21 | 46  |
| CLL_5    | CLL    | chr9  | 16958278 | 16958278 | G   | T                                  | BNC2(dist=87492),CNTLN(dist=176760)      | intergenic | 0.26 | 46  |
| CLL_5    | PMN    | chr9  | 16958278 | 16958278 | G   | T                                  | BNC2(dist=87492),CNTLN(dist=176760)      | intergenic | 0.27 | 40  |
| LC-MBL_5 | LC-MBL | chr8  | 18123545 | 18123545 | T   | -                                  | NAT1(dist=42347),NAT2(dist=125210)       | intergenic | 0.48 | 113 |
| LC-MBL_5 | PMN    | chr8  | 18123545 | 18123545 | T   | -                                  | NAT1(dist=42347),NAT2(dist=125210)       | intergenic | 0.35 | 96  |
| LC-MBL_5 | LC-MBL | chr8  | 18123547 | 18123547 | A   | G                                  | NAT1(dist=42349),NAT2(dist=125208)       | intergenic | 0.48 | 113 |
| LC-MBL_5 | PMN    | chr8  | 18123547 | 18123547 | A   | G                                  | NAT1(dist=42349),NAT2(dist=125208)       | intergenic | 0.35 | 96  |
| LC-MBL_5 | LC-MBL | chr6  | 20749006 | 20749006 | -   | GAAAACTGGA<br>GAGCCACATG<br>CAAAA  | CDKAL1                                   | intronic   | 0.16 | 12  |
| LC-MBL_5 | PMN    | chr6  | 20749006 | 20749006 | -   | GAAAACTGGA<br>GAGCCACATG<br>CAAAA  | CDKAL1                                   | intronic   | 0.18 | 16  |
| CLL_4    | CLL    | chrX  | 21975165 | 21975165 | A   | T                                  | SMS                                      | intronic   | 0.94 | 17  |
| CLL_4    | PMN    | chrX  | 21975165 | 21975165 | A   | T                                  | SMS                                      | intronic   | 0.36 | 19  |
| LC-MBL_1 | LC-MBL | chr22 | 25152165 | 25152165 | G   | C                                  | PIWIL3                                   | intronic   | 0.66 | 15  |
| LC-MBL_1 | PMN    | chr22 | 25152165 | 25152165 | G   | C                                  | PIWIL3                                   | intronic   | 0.5  | 10  |
| LC-MBL_6 | LC-MBL | chr20 | 25389115 | 25389117 | TAT | -                                  | GINS1                                    | intronic   | 0.4  | 15  |
| LC-MBL_6 | PMN    | chr20 | 25389115 | 25389117 | TAT | -                                  | GINS1                                    | intronic   | 0.63 | 33  |
| LC-MBL_4 | LC-MBL | chr20 | 26310418 | 26310418 | C   | G                                  | LOC284801(dist=120549),NONE(dist=NONE)   | intergenic | 0.31 | 45  |
| LC-MBL_4 | PMN    | chr20 | 26310418 | 26310418 | C   | G                                  | LOC284801(dist=120549),NONE(dist=NONE)   | intergenic | 0.25 | 43  |
| LC-MBL_4 | LC-MBL | chr3  | 29623690 | 29623690 | C   | T                                  | RBMS3                                    | intronic   | 0.2  | 55  |
| LC-MBL_4 | PMN    | chr3  | 29623690 | 29623690 | C   | T                                  | RBMS3                                    | intronic   | 0.29 | 41  |
| LC-MBL_6 | LC-MBL | chr14 | 30932584 | 30932584 | -   | GAGGCACAAG<br>GATCGCTTGA<br>ACCTGG | PRKD1(dist=535685),G2E3(dist=95745)      | intergenic | 0.31 | 22  |
| LC-MBL_6 | PMN    | chr14 | 30932584 | 30932584 | -   | GAGGCACAAG<br>GATCGCTTGA<br>ACCTGG | PRKD1(dist=535685),G2E3(dist=95745)      | intergenic | 0.25 | 24  |
| CLL_1    | CLL    | chrX  | 32462845 | 32462845 | -   | GACTTGAGGG<br>GAGTGAGGT            | DMD                                      | intronic   | 0.38 | 26  |
| CLL_1    | PMN    | chrX  | 32462845 | 32462845 | -   | GACTTGAGGG<br>GAGTGAGGT            | DMD                                      | intronic   | 0.41 | 12  |

|          |        |       |          |          |        |                           |                                        |            |      |    |
|----------|--------|-------|----------|----------|--------|---------------------------|----------------------------------------|------------|------|----|
| CLL_1    | CLL    | chr13 | 32746053 | 32746053 | A      | G                         | FRY                                    | intronic   | 0.21 | 37 |
| CLL_1    | PMN    | chr13 | 32746053 | 32746053 | A      | G                         | FRY                                    | intronic   | 0.18 | 33 |
| CLL_1    | CLL    | chr13 | 32746055 | 32746055 | -      | TGTGGA                    | FRY                                    | intronic   | 0.21 | 37 |
| CLL_1    | PMN    | chr13 | 32746055 | 32746055 | -      | TGTGGA                    | FRY                                    | intronic   | 0.18 | 33 |
| HC-MBL_5 | LC-MBL | chr10 | 33432834 | 33432834 | G      | T                         | ITGB1(dist=185541),NRP1(dist=33585)    | intergenic | 0.21 | 64 |
| HC-MBL_5 | PMN    | chr10 | 33432834 | 33432834 | G      | T                         | ITGB1(dist=185541),NRP1(dist=33585)    | intergenic | 0.17 | 63 |
| CLL_4    | CLL    | chr8  | 34187757 | 34187757 | G      | T                         | DUSP26(dist=730318),UNC5D(dist=905218) | intergenic | 0.60 | 58 |
| CLL_4    | PMN    | chr8  | 34187757 | 34187757 | G      | T                         | DUSP26(dist=730318),UNC5D(dist=905218) | intergenic | 0.15 | 66 |
| HC-MBL_3 | HC-MBL | chr12 | 34572304 | 34572304 | -      | ACGTTTAATTC<br>TTT        | ALG10(dist=391068),NONE(dist=NONE)     | intergenic | 0.12 | 25 |
| HC-MBL_3 | PMN    | chr12 | 34572304 | 34572304 | -      | ACGTTTAATTC<br>TTT        | ALG10(dist=391068),NONE(dist=NONE)     | intergenic | 0.17 | 29 |
| HC-MBL_3 | HC-MBL | chr12 | 34572309 | 34572309 | T      | A                         | ALG10(dist=391073),NONE(dist=NONE)     | intergenic | 0.12 | 25 |
| HC-MBL_3 | PMN    | chr12 | 34572309 | 34572309 | T      | A                         | ALG10(dist=391073),NONE(dist=NONE)     | intergenic | 0.17 | 29 |
| CLL_5    | CLL    | chr16 | 35276818 | 35276818 | -      | AACAGGAAATA<br>ACTTCACATA | FLJ26245(dist=285823),NONE(dist=NONE)  | intergenic | 0.27 | 22 |
| CLL_5    | PMN    | chr16 | 35276818 | 35276818 | -      | AACAGGAAATA<br>ACTTCACATA | FLJ26245(dist=285823),NONE(dist=NONE)  | intergenic | 0.30 | 23 |
| LC-MBL_5 | LC-MBL | chr21 | 37281760 | 37281765 | AAACAT | -                         | MIR802(dist=188654),SETD4(dist=125074) | intergenic | 0.43 | 37 |
| LC-MBL_5 | PMN    | chr21 | 37281760 | 37281765 | AAACAT | -                         | MIR802(dist=188654),SETD4(dist=125074) | intergenic | 0.39 | 33 |
| LC-MBL_5 | LC-MBL | chr21 | 37281772 | 37281772 | -      | GGG                       | MIR802(dist=188666),SETD4(dist=125067) | intergenic | 0.33 | 48 |
| LC-MBL_5 | PMN    | chr21 | 37281772 | 37281772 | -      | GGG                       | MIR802(dist=188666),SETD4(dist=125067) | intergenic | 0.32 | 37 |
| LC-MBL_5 | LC-MBL | chr21 | 37281776 | 37281776 | G      | T                         | MIR802(dist=188670),SETD4(dist=125063) | intergenic | 0.30 | 52 |
| LC-MBL_5 | PMN    | chr21 | 37281776 | 37281776 | G      | T                         | MIR802(dist=188670),SETD4(dist=125063) | intergenic | 0.30 | 39 |
| LC-MBL_5 | LC-MBL | chr21 | 37281777 | 37281777 | A      | C                         | MIR802(dist=188671),SETD4(dist=125062) | intergenic | 0.30 | 52 |
| LC-MBL_5 | PMN    | chr21 | 37281777 | 37281777 | A      | C                         | MIR802(dist=188671),SETD4(dist=125062) | intergenic | 0.30 | 39 |
| LC-MBL_6 | LC-MBL | chr12 | 38064665 | 38064665 | C      | G                         | NONE(dist=NONE),ALG10B(dist=645892)    | intergenic | 0.35 | 42 |
| LC-MBL_6 | PMN    | chr12 | 38064665 | 38064665 | C      | G                         | NONE(dist=NONE),ALG10B(dist=645892)    | intergenic | 0.35 | 56 |
| LC-MBL_6 | LC-MBL | chr12 | 38064668 | 38064668 | A      | T                         | NONE(dist=NONE),ALG10B(dist=645889)    | intergenic | 0.35 | 42 |
| LC-MBL_6 | PMN    | chr12 | 38064668 | 38064668 | A      | T                         | NONE(dist=NONE),ALG10B(dist=645889)    | intergenic | 0.35 | 56 |
| LC-MBL_6 | LC-MBL | chr12 | 38064669 | 38064669 | A      | C                         | NONE(dist=NONE),ALG10B(dist=645888)    | intergenic | 0.35 | 42 |
| LC-MBL_6 | PMN    | chr12 | 38064669 | 38064669 | A      | C                         | NONE(dist=NONE),ALG10B(dist=645888)    | intergenic | 0.35 | 56 |
| LC-MBL_6 | LC-MBL | chr12 | 38064670 | 38064670 | T      | A                         | NONE(dist=NONE),ALG10B(dist=645887)    | intergenic | 0.35 | 42 |
| LC-MBL_6 | PMN    | chr12 | 38064670 | 38064670 | T      | A                         | NONE(dist=NONE),ALG10B(dist=645887)    | intergenic | 0.35 | 56 |
| LC-MBL_6 | LC-MBL | chr12 | 38064674 | 38064674 | C      | G                         | NONE(dist=NONE),ALG10B(dist=645883)    | intergenic | 0.35 | 42 |
| LC-MBL_6 | PMN    | chr12 | 38064674 | 38064674 | C      | G                         | NONE(dist=NONE),ALG10B(dist=645883)    | intergenic | 0.35 | 56 |
| LC-MBL_6 | LC-MBL | chr12 | 38064682 | 38064682 | C      | G                         | NONE(dist=NONE),ALG10B(dist=645875)    | intergenic | 0.31 | 48 |

|          |        |       |          |          |                                                      |      |                                                |                |      |     |
|----------|--------|-------|----------|----------|------------------------------------------------------|------|------------------------------------------------|----------------|------|-----|
| LC-MBL_6 | PMN    | chr12 | 38064682 | 38064682 | C                                                    | G    | NONE(dist=NONE),ALG10B(dist=645875)            | intergenic     | 0.32 | 68  |
| LC-MBL_6 | LC-MBL | chr12 | 38064688 | 38064688 | T                                                    | C    | NONE(dist=NONE),ALG10B(dist=645869)            | intergenic     | 0.3  | 50  |
| LC-MBL_6 | PMN    | chr12 | 38064688 | 38064688 | T                                                    | C    | NONE(dist=NONE),ALG10B(dist=645869)            | intergenic     | 0.27 | 68  |
| LC-MBL_6 | LC-MBL | chr12 | 38064689 | 38064689 | G                                                    | A    | NONE(dist=NONE),ALG10B(dist=645868)            | intergenic     | 0.3  | 50  |
| LC-MBL_6 | PMN    | chr12 | 38064689 | 38064689 | G                                                    | A    | NONE(dist=NONE),ALG10B(dist=645868)            | intergenic     | 0.27 | 68  |
| HC-MBL_2 | HC-MBL | chr3  | 38129024 | 38129044 | ACACCATCCATC<br>AGCATGCTC                            | -    | DLEC1                                          | intronic       | 0.30 | 52  |
| HC-MBL_2 | PMN    | chr3  | 38129024 | 38129044 | ACACCATCCATC<br>AGCATGCTC                            | -    | DLEC1                                          | intronic       | 0.46 | 43  |
| LC-MBL_4 | LC-MBL | chr10 | 38778199 | 38778199 | T                                                    | C    | LOC399744(dist=37118),ACTR3BP5(dist=211528)    | intergenic     | 0.19 | 120 |
| LC-MBL_4 | PMN    | chr10 | 38778199 | 38778199 | T                                                    | C    | LOC399744(dist=37118),ACTR3BP5(dist=211528)    | intergenic     | 0.12 | 99  |
| LC-MBL_6 | LC-MBL | chr10 | 38786152 | 38786152 | G                                                    | T    | LOC399744(dist=45071),ACTR3BP5(dist=203575)    | intergenic     | 0.25 | 100 |
| LC-MBL_6 | PMN    | chr10 | 38786152 | 38786152 | G                                                    | T    | LOC399744(dist=45071),ACTR3BP5(dist=203575)    | intergenic     | 0.18 | 91  |
| LC-MBL_6 | LC-MBL | chr10 | 38786155 | 38786155 | C                                                    | A    | LOC399744(dist=45074),ACTR3BP5(dist=203572)    | intergenic     | 0.25 | 100 |
| LC-MBL_6 | PMN    | chr10 | 38786155 | 38786155 | C                                                    | A    | LOC399744(dist=45074),ACTR3BP5(dist=203572)    | intergenic     | 0.18 | 91  |
| LC-MBL_6 | LC-MBL | chr10 | 38786156 | 38786156 | T                                                    | C    | LOC399744(dist=45075),ACTR3BP5(dist=203571)    | intergenic     | 0.25 | 100 |
| LC-MBL_6 | PMN    | chr10 | 38786156 | 38786156 | T                                                    | C    | LOC399744(dist=45075),ACTR3BP5(dist=203571)    | intergenic     | 0.18 | 91  |
| LC-MBL_6 | LC-MBL | chr10 | 38786159 | 38786159 | T                                                    | -    | LOC399744(dist=45078),ACTR3BP5(dist=203568)    | intergenic     | 0.25 | 100 |
| LC-MBL_6 | PMN    | chr10 | 38786159 | 38786159 | T                                                    | -    | LOC399744(dist=45078),ACTR3BP5(dist=203568)    | intergenic     | 0.18 | 91  |
| HC-MBL_3 | HC-MBL | chr10 | 39112116 | 39112116 | A                                                    | T    | ACTR3BP5(dist=120745),NONE(dist=NONE)          | intergenic     | 0.59 | 160 |
| HC-MBL_3 | PMN    | chr10 | 39112116 | 39112116 | A                                                    | T    | ACTR3BP5(dist=120745),NONE(dist=NONE)          | intergenic     | 0.42 | 99  |
| HC-MBL_3 | HC-MBL | chr10 | 39112121 | 39112121 | A                                                    | G    | ACTR3BP5(dist=120750),NONE(dist=NONE)          | intergenic     | 0.59 | 160 |
| HC-MBL_3 | PMN    | chr10 | 39112121 | 39112121 | A                                                    | G    | ACTR3BP5(dist=120750),NONE(dist=NONE)          | intergenic     | 0.42 | 99  |
| LC-MBL_6 | LC-MBL | chr17 | 41399300 | 41399300 | T                                                    | G    | LINC00854(dist=18238),LOC100130581(dist=47913) | intergenic     | 0.32 | 77  |
| LC-MBL_6 | PMN    | chr17 | 41399300 | 41399300 | T                                                    | G    | LINC00854(dist=18238),LOC100130581(dist=47913) | intergenic     | 0.40 | 67  |
| HC-MBL_1 | HC-MBL | chr13 | 41436110 | 41436110 | -                                                    | TGTG | TPTE2P5                                        | ncRNA_intronic | 0.66 | 21  |
| HC-MBL_1 | PMN    | chr13 | 41436110 | 41436110 | -                                                    | TGTG | TPTE2P5                                        | ncRNA_intronic | 0.61 | 13  |
| HC-MBL_5 | LC-MBL | chr5  | 42406349 | 42406349 | G                                                    | A    | FBXO4(dist=464677),GHR(dist=17528)             | intergenic     | 0.55 | 18  |
| HC-MBL_5 | PMN    | chr5  | 42406349 | 42406349 | G                                                    | A    | FBXO4(dist=464677),GHR(dist=17528)             | intergenic     | 0.33 | 15  |
| HC-MBL_4 | HC-MBL | chr17 | 43222702 | 43222741 | AGCAGGGCCAC<br>CTTGGTGGGGG<br>ATGCAGGCCTG<br>GAGCTGA | -    | ACBD4(dist=1159),HEXIM1(dist=1943)             | intergenic     | 0.52 | 21  |
| HC-MBL_4 | PMN    | chr17 | 43222702 | 43222741 | AGCAGGGCCAC<br>CTTGGTGGGGG<br>ATGCAGGCCTG<br>GAGCTGA | -    | ACBD4(dist=1159),HEXIM1(dist=1943)             | intergenic     | 0.41 | 29  |
| LC-MBL_4 | LC-MBL | chr22 | 44010081 | 44010081 | C                                                    | A    | EFCAB6                                         | intronic       | 0.16 | 24  |
| LC-MBL_4 | PMN    | chr22 | 44010081 | 44010081 | C                                                    | A    | EFCAB6                                         | intronic       | 0.27 | 29  |



|          |        |       |          |          |                                                    |                        |                                            |            |      |     |
|----------|--------|-------|----------|----------|----------------------------------------------------|------------------------|--------------------------------------------|------------|------|-----|
| LC-MBL_4 | LC-MBL | chr19 | 44021896 | 44021896 | C                                                  | A                      | ETHE1                                      | intronic   | 0.2  | 45  |
| LC-MBL_4 | PMN    | chr19 | 44021896 | 44021896 | C                                                  | A                      | ETHE1                                      | intronic   | 0.25 | 31  |
| LC-MBL_4 | LC-MBL | chr19 | 44021899 | 44021899 | C                                                  | G                      | ETHE1                                      | intronic   | 0.2  | 45  |
| LC-MBL_4 | PMN    | chr19 | 44021899 | 44021899 | C                                                  | G                      | ETHE1                                      | intronic   | 0.25 | 31  |
| HC-MBL_2 | HC-MBL | chr3  | 45121901 | 45121901 | T                                                  | A                      | CLEC3B(dist=44338),CDCP1(dist=1868)        | intergenic | 0.25 | 47  |
| HC-MBL_2 | PMN    | chr3  | 45121901 | 45121901 | T                                                  | A                      | CLEC3B(dist=44338),CDCP1(dist=1868)        | intergenic | 0.12 | 31  |
| LC-MBL_5 | LC-MBL | chr22 | 48003778 | 48003815 | ATGCCACCACCC<br>CTGGCTAATGCC<br>GCCACACCTGG<br>CTA | -                      | TBC1D22A(dist=432436),FLJ46257(dist=12977) | intergenic | 0.76 | 38  |
| LC-MBL_5 | PMN    | chr22 | 48003778 | 48003815 | ATGCCACCACCC<br>CTGGCTAATGCC<br>GCCACACCTGG<br>CTA | -                      | TBC1D22A(dist=432436),FLJ46257(dist=12977) | intergenic | 0.66 | 30  |
| LC-MBL_1 | LC-MBL | chr19 | 48107325 | 48107325 | -                                                  | GGG                    | ZNF541(dist=48212),GLTSCR1(dist=4128)      | intergenic | 0.17 | 35  |
| LC-MBL_1 | PMN    | chr19 | 48107325 | 48107325 | -                                                  | GGG                    | ZNF541(dist=48212),GLTSCR1(dist=4128)      | intergenic | 0.20 | 39  |
| LC-MBL_4 | LC-MBL | chr11 | 48962962 | 48962962 | C                                                  | A                      | OR4A47(dist=451688),TRIM49B(dist=90190)    | intergenic | 0.47 | 112 |
| LC-MBL_4 | PMN    | chr11 | 48962962 | 48962962 | C                                                  | A                      | OR4A47(dist=451688),TRIM49B(dist=90190)    | intergenic | 0.41 | 130 |
| LC-MBL_6 | LC-MBL | chr11 | 48962969 | 48962969 | -                                                  | A                      | OR4A47(dist=451695),TRIM49B(dist=90183)    | intergenic | 0.44 | 83  |
| LC-MBL_6 | PMN    | chr11 | 48962969 | 48962969 | -                                                  | A                      | OR4A47(dist=451695),TRIM49B(dist=90183)    | intergenic | 0.47 | 92  |
| LC-MBL_6 | LC-MBL | chr5  | 49536053 | 49536053 | C                                                  | A                      | NONE(dist=NONE),EMB(dist=155978)           | intergenic | 0.40 | 37  |
| LC-MBL_6 | PMN    | chr5  | 49536053 | 49536053 | C                                                  | A                      | NONE(dist=NONE),EMB(dist=155978)           | intergenic | 0.57 | 52  |
| LC-MBL_6 | LC-MBL | chr5  | 49536070 | 49536070 | A                                                  | G                      | NONE(dist=NONE),EMB(dist=155961)           | intergenic | 0.36 | 36  |
| LC-MBL_6 | PMN    | chr5  | 49536070 | 49536070 | A                                                  | G                      | NONE(dist=NONE),EMB(dist=155961)           | intergenic | 0.54 | 50  |
| LC-MBL_6 | LC-MBL | chr11 | 50763731 | 50763731 | G                                                  | T                      | LOC646813(dist=383929),OR4A5(dist=647647)  | intergenic | 0.24 | 75  |
| LC-MBL_6 | PMN    | chr11 | 50763731 | 50763731 | G                                                  | T                      | LOC646813(dist=383929),OR4A5(dist=647647)  | intergenic | 0.20 | 86  |
| LC-MBL_4 | LC-MBL | chr11 | 51572224 | 51572224 | T                                                  | C                      | OR4C46(dist=56013),NONE(dist=NONE)         | intergenic | 0.41 | 72  |
| LC-MBL_4 | PMN    | chr11 | 51572224 | 51572224 | T                                                  | C                      | OR4C46(dist=56013),NONE(dist=NONE)         | intergenic | 0.39 | 58  |
| LC-MBL_4 | LC-MBL | chr11 | 51572225 | 51572225 | A                                                  | C                      | OR4C46(dist=56014),NONE(dist=NONE)         | intergenic | 0.41 | 72  |
| LC-MBL_4 | PMN    | chr11 | 51572225 | 51572225 | A                                                  | C                      | OR4C46(dist=56014),NONE(dist=NONE)         | intergenic | 0.39 | 58  |
| LC-MBL_4 | LC-MBL | chr11 | 51572226 | 51572226 | A                                                  | G                      | OR4C46(dist=56015),NONE(dist=NONE)         | intergenic | 0.41 | 72  |
| LC-MBL_4 | PMN    | chr11 | 51572226 | 51572226 | A                                                  | G                      | OR4C46(dist=56015),NONE(dist=NONE)         | intergenic | 0.39 | 58  |
| CLL_5    | CLL    | chr13 | 52494296 | 52494296 | -                                                  | TGAGCTGCTG<br>CCTGTATT | CCDC70(dist=53924),ATP7B(dist=12510)       | intergenic | 0.32 | 28  |
| CLL_5    | PMN    | chr13 | 52494296 | 52494296 | -                                                  | TGAGCTGCTG<br>CCTGTATT | CCDC70(dist=53924),ATP7B(dist=12510)       | intergenic | 0.36 | 22  |
| LC-MBL_1 | LC-MBL | chr20 | 55594182 | 55594215 | CCGAGGCGGGA<br>GCCTTCTCCGCT<br>GTGGGGCTGTC         | -                      | TFAP2C(dist=379844),BMP7(dist=149594)      | intergenic | 0.52 | 17  |
| LC-MBL_1 | PMN    | chr20 | 55594182 | 55594215 | CCGAGGCGGGA<br>GCCTTCTCCGCT<br>GTGGGGCTGTC         | -                      | TFAP2C(dist=379844),BMP7(dist=149594)      | intergenic | 0.54 | 22  |

|           |        |       |          |          |                             |                                  |                                                 |            |      |    |
|-----------|--------|-------|----------|----------|-----------------------------|----------------------------------|-------------------------------------------------|------------|------|----|
| CLL_4     | CLL    | chr10 | 56045729 | 56045729 | G                           | T                                | PCDH15                                          | intronic   | 0.47 | 34 |
| CLL_4     | PMN    | chr10 | 56045729 | 56045729 | G                           | T                                | PCDH15                                          | intronic   | 0.16 | 37 |
| CLL_4     | CLL    | chr1  | 56909789 | 56909789 | G                           | A                                | MIR4422(dist=1218393),PPAP2B(dist=50630)        | intergenic | 0.51 | 62 |
| CLL_4     | PMN    | chr1  | 56909789 | 56909789 | G                           | A                                | MIR4422(dist=1218393),PPAP2B(dist=50630)        | intergenic | 0.18 | 55 |
| LC-MBL_2  | LC-MBL | chr7  | 57955916 | 57955916 | G                           | T                                | ZNF716(dist=422651),NONE(dist=NONE)             | intergenic | 0.18 | 32 |
| LC-MBL_2  | PMN    | chr7  | 57955916 | 57955916 | G                           | T                                | ZNF716(dist=422651),NONE(dist=NONE)             | intergenic | 0.13 | 36 |
| LC-MBL_2  | LC-MBL | chr7  | 57955920 | 57955920 | A                           | T                                | ZNF716(dist=422655),NONE(dist=NONE)             | intergenic | 0.18 | 32 |
| LC-MBL_2  | PMN    | chr7  | 57955920 | 57955920 | A                           | T                                | ZNF716(dist=422655),NONE(dist=NONE)             | intergenic | 0.13 | 36 |
| CLL_4     | CLL    | chr11 | 60633987 | 60633987 | A                           | G                                | PTGDR2(dist=10543),ZP1(dist=1028)               | intergenic | 0.26 | 42 |
| CLL_4     | PMN    | chr11 | 60633987 | 60633987 | A                           | G                                | PTGDR2(dist=10543),ZP1(dist=1028)               | intergenic | 0.23 | 47 |
| HC-MBL_2  | HC-MBL | chr20 | 62845104 | 62845104 | -                           | TGTGAGTGTA<br>CGTGCA             | MYT1                                            | intronic   | 0.36 | 47 |
| HC-MBL_2  | PMN    | chr20 | 62845104 | 62845104 | -                           | TGTGAGTGTA<br>CGTGCA             | MYT1                                            | intronic   | 0.39 | 41 |
| HC-MBL_10 | PMN    | chr15 | 66980888 | 66980888 | G                           | T                                | LCTL(dist=123053),SMAD6(dist=13786)             | intergenic | 0.20 | 29 |
| HC-MBL_4  | HC-MBL | chr15 | 66980888 | 66980888 | G                           | T                                | LCTL(dist=123053),SMAD6(dist=13786)             | intergenic | 0.28 | 21 |
| HC-MBL_11 | PMN    | chr15 | 66980889 | 66980889 | A                           | T                                | LCTL(dist=123054),SMAD6(dist=13785)             | intergenic | 0.20 | 29 |
| HC-MBL_4  | HC-MBL | chr15 | 66980889 | 66980889 | A                           | T                                | LCTL(dist=123054),SMAD6(dist=13785)             | intergenic | 0.28 | 21 |
| HC-MBL_12 | PMN    | chr15 | 66980890 | 66980890 | G                           | T                                | LCTL(dist=123055),SMAD6(dist=13784)             | intergenic | 0.20 | 29 |
| HC-MBL_4  | HC-MBL | chr15 | 66980890 | 66980890 | G                           | T                                | LCTL(dist=123055),SMAD6(dist=13784)             | intergenic | 0.28 | 21 |
| HC-MBL_21 | PMN    | chrX  | 67924538 | 67924538 | G                           | A                                | STARD8                                          | intronic   | 0.22 | 31 |
| HC-MBL_4  | HC-MBL | chrX  | 67924538 | 67924538 | G                           | A                                | STARD8                                          | intronic   | 1.0  | 23 |
| HC-MBL_4  | HC-MBL | chr7  | 69403285 | 69403285 | T                           | C                                | AUTS2                                           | intronic   | 0.48 | 43 |
| HC-MBL_5  | PMN    | chr7  | 69403285 | 69403285 | T                           | C                                | AUTS2                                           | intronic   | 0.20 | 34 |
| CLL_4     | CLL    | chr17 | 72644428 | 72644428 | G                           | A                                | CD300E(dist=24531),RAB37(dist=22828)            | intergenic | 0.63 | 22 |
| CLL_4     | PMN    | chr17 | 72644428 | 72644428 | G                           | A                                | CD300E(dist=24531),RAB37(dist=22828)            | intergenic | 0.3  | 30 |
| LC-MBL_6  | LC-MBL | chr2  | 73709565 | 73709565 | -                           | TGGTGGATAA<br>GCTTTTCGGT<br>GTGC | ALMS1                                           | intronic   | 0.14 | 14 |
| LC-MBL_6  | PMN    | chr2  | 73709565 | 73709565 | -                           | TGGTGGATAA<br>GCTTTTCGGT<br>GTGC | ALMS1                                           | intronic   | 0.14 | 21 |
| CLL_5     | CLL    | chr18 | 74473944 | 74473966 | TTCCTGTGCTTT<br>GAGTGTGTTTA | -                                | LOC284276(dist=202160),LOC100131655(dist=32722) | intergenic | 0.66 | 27 |
| CLL_5     | PMN    | chr18 | 74473944 | 74473966 | TTCCTGTGCTTT<br>GAGTGTGTTTA | -                                | LOC284276(dist=202160),LOC100131655(dist=32722) | intergenic | 0.48 | 25 |
| CLL_1     | CLL    | chr12 | 75036725 | 75036725 | -                           | T                                | ATXN7L3B(dist=101493),KCNC2(dist=397133)        | intergenic | 0.45 | 20 |
| CLL_1     | PMN    | chr12 | 75036725 | 75036725 | -                           | T                                | ATXN7L3B(dist=101493),KCNC2(dist=397133)        | intergenic | 0.6  | 25 |
| HC-MBL_22 | PMN    | chr3  | 77014932 | 77014932 | -                           | TG                               | ZNF717(dist=1180677),ROBO2(dist=74362)          | intergenic | 0.55 | 9  |
| HC-MBL_4  | HC-MBL | chr3  | 77014932 | 77014932 | -                           | TG                               | ZNF717(dist=1180677),ROBO2(dist=74362)          | intergenic | 0.5  | 14 |

|          |        |       |          |          |   |    |                                               |            |      |     |
|----------|--------|-------|----------|----------|---|----|-----------------------------------------------|------------|------|-----|
| HC-MBL_4 | HC-MBL | chr14 | 86942177 | 86942177 | - | GC | FLRT2(dist=847907),LOC283585(dist=429945)     | intergenic | 0.18 | 49  |
| HC-MBL_6 | PMN    | chr14 | 86942177 | 86942177 | - | GC | FLRT2(dist=847907),LOC283585(dist=429945)     | intergenic | 0.22 | 36  |
| HC-MBL_4 | HC-MBL | chr14 | 86942178 | 86942178 | - | C  | FLRT2(dist=847908),LOC283585(dist=429944)     | intergenic | 0.18 | 49  |
| HC-MBL_7 | PMN    | chr14 | 86942178 | 86942178 | - | C  | FLRT2(dist=847908),LOC283585(dist=429944)     | intergenic | 0.22 | 36  |
| HC-MBL_4 | HC-MBL | chr14 | 86942179 | 86942179 | - | C  | FLRT2(dist=847909),LOC283585(dist=429943)     | intergenic | 0.18 | 49  |
| HC-MBL_8 | PMN    | chr14 | 86942179 | 86942179 | - | C  | FLRT2(dist=847909),LOC283585(dist=429943)     | intergenic | 0.22 | 36  |
| HC-MBL_4 | HC-MBL | chr14 | 86942180 | 86942180 | T | A  | FLRT2(dist=847910),LOC283585(dist=429942)     | intergenic | 0.18 | 49  |
| HC-MBL_9 | PMN    | chr14 | 86942180 | 86942180 | T | A  | FLRT2(dist=847910),LOC283585(dist=429942)     | intergenic | 0.22 | 36  |
| CLL_4    | CLL    | chr9  | 89475535 | 89475535 | T | A  | ZCCHC6(dist=506133),GAS1(dist=83742)          | intergenic | 0.47 | 34  |
| CLL_4    | PMN    | chr9  | 89475535 | 89475535 | T | A  | ZCCHC6(dist=506133),GAS1(dist=83742)          | intergenic | 0.20 | 39  |
| LC-MBL_6 | LC-MBL | chr2  | 89849647 | 89849647 | T | C  | MIR4436A(dist=737679),LOC654342(dist=1975062) | intergenic | 0.19 | 110 |
| LC-MBL_6 | PMN    | chr2  | 89849647 | 89849647 | T | C  | MIR4436A(dist=737679),LOC654342(dist=1975062) | intergenic | 0.21 | 119 |
| LC-MBL_6 | LC-MBL | chr2  | 89849648 | 89849648 | T | G  | MIR4436A(dist=737680),LOC654342(dist=1975061) | intergenic | 0.19 | 110 |
| LC-MBL_6 | PMN    | chr2  | 89849648 | 89849648 | T | G  | MIR4436A(dist=737680),LOC654342(dist=1975061) | intergenic | 0.21 | 119 |
| LC-MBL_6 | LC-MBL | chr2  | 89849649 | 89849649 | C | G  | MIR4436A(dist=737681),LOC654342(dist=1975060) | intergenic | 0.19 | 110 |
| LC-MBL_6 | PMN    | chr2  | 89849649 | 89849649 | C | G  | MIR4436A(dist=737681),LOC654342(dist=1975060) | intergenic | 0.21 | 119 |
| LC-MBL_6 | LC-MBL | chr2  | 89849652 | 89849652 | T | A  | MIR4436A(dist=737684),LOC654342(dist=1975057) | intergenic | 0.19 | 110 |
| LC-MBL_6 | PMN    | chr2  | 89849652 | 89849652 | T | A  | MIR4436A(dist=737684),LOC654342(dist=1975057) | intergenic | 0.21 | 119 |
| LC-MBL_6 | LC-MBL | chr2  | 89849653 | 89849653 | C | A  | MIR4436A(dist=737685),LOC654342(dist=1975056) | intergenic | 0.19 | 110 |
| LC-MBL_6 | PMN    | chr2  | 89849653 | 89849653 | C | A  | MIR4436A(dist=737685),LOC654342(dist=1975056) | intergenic | 0.21 | 119 |
| LC-MBL_6 | LC-MBL | chr2  | 89849654 | 89849654 | T | A  | MIR4436A(dist=737686),LOC654342(dist=1975055) | intergenic | 0.19 | 110 |
| LC-MBL_6 | PMN    | chr2  | 89849654 | 89849654 | T | A  | MIR4436A(dist=737686),LOC654342(dist=1975055) | intergenic | 0.21 | 119 |
| LC-MBL_6 | LC-MBL | chr2  | 89849657 | 89849657 | T | C  | MIR4436A(dist=737689),LOC654342(dist=1975052) | intergenic | 0.19 | 110 |
| LC-MBL_6 | PMN    | chr2  | 89849657 | 89849657 | T | C  | MIR4436A(dist=737689),LOC654342(dist=1975052) | intergenic | 0.21 | 119 |
| LC-MBL_6 | LC-MBL | chr2  | 89849663 | 89849663 | C | T  | MIR4436A(dist=737695),LOC654342(dist=1975046) | intergenic | 0.26 | 118 |
| LC-MBL_6 | PMN    | chr2  | 89849663 | 89849663 | C | T  | MIR4436A(dist=737695),LOC654342(dist=1975046) | intergenic | 0.24 | 129 |
| LC-MBL_4 | LC-MBL | chr3  | 90403090 | 90403090 | C | G  | EPHA3(dist=871806),NONE(dist=NONE)            | intergenic | 0.33 | 113 |
| LC-MBL_4 | PMN    | chr3  | 90403090 | 90403090 | C | G  | EPHA3(dist=871806),NONE(dist=NONE)            | intergenic | 0.27 | 111 |
| LC-MBL_4 | LC-MBL | chr3  | 90403222 | 90403222 | A | C  | EPHA3(dist=871938),NONE(dist=NONE)            | intergenic | 0.39 | 148 |
| LC-MBL_4 | PMN    | chr3  | 90403222 | 90403222 | A | C  | EPHA3(dist=871938),NONE(dist=NONE)            | intergenic | 0.47 | 125 |
| LC-MBL_3 | LC-MBL | chr15 | 90641805 | 90641805 | C | A  | IDH2                                          | intronic   | 0.17 | 93  |
| LC-MBL_3 | PMN    | chr15 | 90641805 | 90641805 | C | A  | IDH2                                          | intronic   | 0.22 | 57  |
| CLL_4    | CLL    | chr3  | 99248247 | 99248247 | T | C  | DCBLD2(dist=627714),MIR548G(dist=24906)       | intergenic | 0.51 | 45  |

|          |        |       |           |           |    |                                          |                                           |            |          |      |    |
|----------|--------|-------|-----------|-----------|----|------------------------------------------|-------------------------------------------|------------|----------|------|----|
| CLL_4    | PMN    | chr3  | 99248247  | 99248247  | T  | C                                        | DCBLD2(dist=627714),MIR548G(dist=24906)   | intergenic | 0.2      | 35   |    |
| CLL_5    | CLL    | chr1  | 100779887 | 100779887 | -  | ATCGT                                    | RTCA(dist=21562),CDC14A(dist=38136)       | intergenic | 0.55     | 29   |    |
| CLL_5    | PMN    | chr1  | 100779887 | 100779887 | -  | ATCGT                                    | RTCA(dist=21562),CDC14A(dist=38136)       | intergenic | 0.34     | 41   |    |
| CLL_5    | CLL    | chr7  | 101137408 | 101137408 | -  | GTTTTATTTTG<br>TTTTGTTTTGT<br>TTTGTTTT   | COL26A1                                   | intronic   | 0.28     | 21   |    |
| CLL_5    | PMN    | chr7  | 101137408 | 101137408 | -  | GTTTTATTTTG<br>TTTTGTTTTGT<br>TTTGTTTT   | COL26A1                                   | intronic   | 0.36     | 19   |    |
| CLL_4    | CLL    | chr5  | 107620103 | 107620103 | C  | T                                        | FBXL17                                    | intronic   | 0.54     | 57   |    |
| CLL_4    | PMN    | chr5  | 107620103 | 107620103 | C  | T                                        | FBXL17                                    | intronic   | 0.21     | 37   |    |
| CLL_5    | CLL    | chr7  | 110012280 | 110012280 | C  | T                                        | EIF3IP1(dist=412010),IMMP2L(dist=290826)  | intergenic | 0.35     | 14   |    |
| CLL_5    | PMN    | chr7  | 110012280 | 110012280 | C  | T                                        | EIF3IP1(dist=412010),IMMP2L(dist=290826)  | intergenic | 0.4      | 20   |    |
| CLL_2    | CLL    | chr4  | 110927393 | 110927424 |    | CAAGAGACTGAA<br>GCAGGAGGGTC<br>ACTTGAACC | -                                         | EGF        | intronic | 0.36 | 44 |
| CLL_2    | PMN    | chr4  | 110927393 | 110927424 |    | CAAGAGACTGAA<br>GCAGGAGGGTC<br>ACTTGAACC | -                                         | EGF        | intronic | 0.38 | 26 |
| LC-MBL_1 | LC-MBL | chr3  | 111806623 | 111806623 | T  | A                                        | C3orf52                                   | intronic   | 0.5      | 36   |    |
| LC-MBL_1 | PMN    | chr3  | 111806623 | 111806623 | T  | A                                        | C3orf52                                   | intronic   | 0.51     | 54   |    |
| CLL_1    | CLL    | chr10 | 115263134 | 115263134 | G  | A                                        | TCF7L2(dist=335698),HABP2(dist=47456)     | intergenic | 0.18     | 81   |    |
| CLL_1    | PMN    | chr10 | 115263134 | 115263134 | G  | A                                        | TCF7L2(dist=335698),HABP2(dist=47456)     | intergenic | 0.17     | 64   |    |
| CLL_4    | CLL    | chr11 | 115570083 | 115570084 | CC | -                                        | CADM1(dist=194842),LOC283143(dist=55967)  | intergenic | 0.54     | 48   |    |
| CLL_4    | PMN    | chr11 | 115570083 | 115570084 | CC | -                                        | CADM1(dist=194842),LOC283143(dist=55967)  | intergenic | 0.23     | 34   |    |
| LC-MBL_4 | LC-MBL | chr5  | 115966442 | 115966442 | -  | TCTCTG                                   | SEMA6A(dist=55891),LOC728342(dist=784766) | intergenic | 0.95     | 45   |    |
| LC-MBL_4 | PMN    | chr5  | 115966442 | 115966442 | -  | TCTCTG                                   | SEMA6A(dist=55891),LOC728342(dist=784766) | intergenic | 0.83     | 36   |    |
| CLL_4    | CLL    | chr11 | 119028401 | 119028401 | C  | G                                        | ABCG4                                     | intronic   | 0.23     | 43   |    |
| CLL_4    | PMN    | chr11 | 119028401 | 119028401 | C  | G                                        | ABCG4                                     | intronic   | 0.25     | 36   |    |
| CLL_4    | CLL    | chr11 | 119028402 | 119028402 | C  | A                                        | ABCG4                                     | intronic   | 0.23     | 43   |    |
| CLL_4    | PMN    | chr11 | 119028402 | 119028402 | C  | A                                        | ABCG4                                     | intronic   | 0.25     | 36   |    |
| LC-MBL_6 | LC-MBL | chr3  | 119799165 | 119799165 | -  | GAAGGAAGAC                               | GSK3B                                     | intronic   | 0.53     | 15   |    |
| LC-MBL_6 | PMN    | chr3  | 119799165 | 119799165 | -  | GAAGGAAGAC                               | GSK3B                                     | intronic   | 0.5      | 26   |    |
| HC-MBL_2 | HC-MBL | chr10 | 123912506 | 123912506 | C  | T                                        | TACC2                                     | intronic   | 0.33     | 24   |    |
| HC-MBL_2 | PMN    | chr10 | 123912506 | 123912506 | C  | T                                        | TACC2                                     | intronic   | 0.83     | 6    |    |
| LC-MBL_5 | LC-MBL | chr11 | 124771650 | 124771650 | T  | -                                        | ROBO4(dist=3819),HEPN1(dist=17496)        | intergenic | 0.50     | 73   |    |
| LC-MBL_5 | PMN    | chr11 | 124771650 | 124771650 | T  | -                                        | ROBO4(dist=3819),HEPN1(dist=17496)        | intergenic | 0.65     | 69   |    |
| LC-MBL_5 | LC-MBL | chr11 | 124771651 | 124771651 | G  | A                                        | ROBO4(dist=3820),HEPN1(dist=17495)        | intergenic | 0.50     | 73   |    |
| LC-MBL_5 | PMN    | chr11 | 124771651 | 124771651 | G  | A                                        | ROBO4(dist=3820),HEPN1(dist=17495)        | intergenic | 0.65     | 69   |    |

|          |        |       |           |           |                                                             |                         |                                                   |            |      |     |
|----------|--------|-------|-----------|-----------|-------------------------------------------------------------|-------------------------|---------------------------------------------------|------------|------|-----|
| LC-MBL_6 | LC-MBL | chr5  | 132479422 | 132479468 | GGCCTGCTGCTA<br>CCTCTGGGCCTT<br>AGGACTTACCAT<br>TCCTACTGCCT | -                       | HSPA4(dist=38713),FSTL4(dist=52684)               | intergenic | 0.6  | 35  |
| LC-MBL_6 | PMN    | chr5  | 132479422 | 132479468 | GGCCTGCTGCTA<br>CCTCTGGGCCTT<br>AGGACTTACCAT<br>TCCTACTGCCT | -                       | HSPA4(dist=38713),FSTL4(dist=52684)               | intergenic | 0.51 | 27  |
| CLL_1    | CLL    | chr11 | 133961411 | 133961411 | A                                                           | G                       | JAM3                                              | intronic   | 0.23 | 38  |
| CLL_1    | PMN    | chr11 | 133961411 | 133961411 | A                                                           | G                       | JAM3                                              | intronic   | 0.4  | 30  |
| CLL_1    | CLL    | chr11 | 134249675 | 134249675 | -                                                           | CCTTGCCCAC<br>CACCCACCG | B3GAT1                                            | UTR3       | 0.45 | 20  |
| CLL_1    | PMN    | chr11 | 134249675 | 134249675 | -                                                           | CCTTGCCCAC<br>CACCCACCG | B3GAT1                                            | UTR3       | 0.45 | 11  |
| LC-MBL_3 | LC-MBL | chr8  | 136642756 | 136642756 | -                                                           | TA                      | KHDRBS3                                           | intronic   | 0.31 | 38  |
| LC-MBL_3 | PMN    | chr8  | 136642756 | 136642756 | -                                                           | TA                      | KHDRBS3                                           | intronic   | 0.38 | 44  |
| LC-MBL_5 | LC-MBL | chr9  | 139493108 | 139493108 | G                                                           | C                       | MIR4674(dist=52397),EGFL7(dist=64271)             | intergenic | 0.13 | 82  |
| LC-MBL_5 | PMN    | chr9  | 139493108 | 139493108 | G                                                           | C                       | MIR4674(dist=52397),EGFL7(dist=64271)             | intergenic | 0.18 | 77  |
| CLL_1    | CLL    | chr5  | 140895092 | 140895092 | T                                                           | C                       | DIAPH1                                            | UTR3       | 0.30 | 46  |
| CLL_1    | PMN    | chr5  | 140895092 | 140895092 | T                                                           | C                       | DIAPH1                                            | UTR3       | 0.21 | 41  |
| LC-MBL_4 | LC-MBL | chr8  | 144057120 | 144057120 | T                                                           | C                       | CYP11B2(dist=57861),LOC100133669(dist=6328)       | intergenic | 0.38 | 34  |
| LC-MBL_4 | PMN    | chr8  | 144057120 | 144057120 | T                                                           | C                       | CYP11B2(dist=57861),LOC100133669(dist=6328)       | intergenic | 0.4  | 30  |
| LC-MBL_4 | LC-MBL | chr8  | 144057121 | 144057121 | G                                                           | T                       | CYP11B2(dist=57862),LOC100133669(dist=6327)       | intergenic | 0.38 | 34  |
| LC-MBL_4 | PMN    | chr8  | 144057121 | 144057121 | G                                                           | T                       | CYP11B2(dist=57862),LOC100133669(dist=6327)       | intergenic | 0.4  | 30  |
| LC-MBL_5 | LC-MBL | chr2  | 146212608 | 146212608 | C                                                           | T                       | DKFZp686O1327(dist=378317),PABPC1P2(dist=1132017) | intergenic | 0.46 | 28  |
| LC-MBL_5 | PMN    | chr2  | 146212608 | 146212608 | C                                                           | T                       | DKFZp686O1327(dist=378317),PABPC1P2(dist=1132017) | intergenic | 0.59 | 22  |
| LC-MBL_5 | LC-MBL | chr2  | 147177726 | 147177726 | A                                                           | G                       | DKFZp686O1327(dist=1343435),PABPC1P2(dist=166899) | intergenic | 0.17 | 35  |
| LC-MBL_5 | PMN    | chr2  | 147177726 | 147177726 | A                                                           | G                       | DKFZp686O1327(dist=1343435),PABPC1P2(dist=166899) | intergenic | 0.15 | 38  |
| LC-MBL_5 | LC-MBL | chr2  | 147177727 | 147177727 | A                                                           | T                       | DKFZp686O1327(dist=1343436),PABPC1P2(dist=166898) | intergenic | 0.17 | 35  |
| LC-MBL_5 | PMN    | chr2  | 147177727 | 147177727 | A                                                           | T                       | DKFZp686O1327(dist=1343436),PABPC1P2(dist=166898) | intergenic | 0.15 | 38  |
| LC-MBL_5 | LC-MBL | chr2  | 147177728 | 147177728 | C                                                           | G                       | DKFZp686O1327(dist=1343437),PABPC1P2(dist=166897) | intergenic | 0.17 | 35  |
| LC-MBL_5 | PMN    | chr2  | 147177728 | 147177728 | C                                                           | G                       | DKFZp686O1327(dist=1343437),PABPC1P2(dist=166897) | intergenic | 0.15 | 38  |
| CLL_4    | CLL    | chrX  | 153904329 | 153904329 | G                                                           | C                       | GAB3                                              | UTR3       | 0.87 | 16  |
| CLL_4    | PMN    | chrX  | 153904329 | 153904329 | G                                                           | C                       | GAB3                                              | UTR3       | 0.21 | 32  |
| CLL_2    | CLL    | chr7  | 153961975 | 153961975 | G                                                           | A                       | DPP6                                              | intronic   | 0.20 | 111 |
| CLL_2    | PMN    | chr7  | 153961975 | 153961975 | G                                                           | A                       | DPP6                                              | intronic   | 0.15 | 39  |
| CLL_2    | CLL    | chr7  | 153961978 | 153961978 | A                                                           | G                       | DPP6                                              | intronic   | 0.20 | 111 |
| CLL_2    | PMN    | chr7  | 153961978 | 153961978 | A                                                           | G                       | DPP6                                              | intronic   | 0.15 | 39  |

|           |        |      |           |           |      |                  |                                              |            |      |    |
|-----------|--------|------|-----------|-----------|------|------------------|----------------------------------------------|------------|------|----|
| LC-MBL_4  | LC-MBL | chr6 | 163111165 | 163111168 | ACAA | -                | PARK2                                        | intronic   | 0.22 | 22 |
| LC-MBL_4  | PMN    | chr6 | 163111165 | 163111168 | ACAA | -                | PARK2                                        | intronic   | 0.26 | 26 |
| CLL_4     | CLL    | chr4 | 169020915 | 169020915 | T    | A                | ANXA10                                       | intronic   | 0.62 | 40 |
| CLL_4     | PMN    | chr4 | 169020915 | 169020915 | T    | A                | ANXA10                                       | intronic   | 0.23 | 26 |
| LC-MBL_1  | LC-MBL | chr1 | 185421404 | 185421404 | -    | CTACCCCT         | LOC100288079(dist=117233),HMCN1(dist=282279) | intergenic | 0.38 | 13 |
| LC-MBL_1  | PMN    | chr1 | 185421404 | 185421404 | -    | CTACCCCT         | LOC100288079(dist=117233),HMCN1(dist=282279) | intergenic | 0.25 | 20 |
| LC-MBL_1  | LC-MBL | chr1 | 185421405 | 185421405 | -    | CCCCTGCCCT<br>TC | LOC100288079(dist=117234),HMCN1(dist=282278) | intergenic | 0.38 | 13 |
| LC-MBL_1  | PMN    | chr1 | 185421405 | 185421405 | -    | CCCCTGCCCT<br>TC | LOC100288079(dist=117234),HMCN1(dist=282278) | intergenic | 0.25 | 20 |
| HC-MBL_13 | PMN    | chr2 | 190956291 | 190956291 | T    | C                | MSTN(dist=28836),C2orf88(dist=46195)         | intergenic | 0.2  | 10 |
| HC-MBL_4  | HC-MBL | chr2 | 190956291 | 190956291 | T    | C                | MSTN(dist=28836),C2orf88(dist=46195)         | intergenic | 0.15 | 20 |
| HC-MBL_14 | PMN    | chr2 | 190956293 | 190956293 | G    | -                | MSTN(dist=28838),C2orf88(dist=46193)         | intergenic | 0.2  | 10 |
| HC-MBL_4  | HC-MBL | chr2 | 190956293 | 190956293 | G    | -                | MSTN(dist=28838),C2orf88(dist=46193)         | intergenic | 0.15 | 20 |
| HC-MBL_15 | PMN    | chr2 | 190956295 | 190956295 | C    | A                | MSTN(dist=28840),C2orf88(dist=46191)         | intergenic | 0.2  | 10 |
| HC-MBL_4  | HC-MBL | chr2 | 190956295 | 190956295 | C    | A                | MSTN(dist=28840),C2orf88(dist=46191)         | intergenic | 0.15 | 20 |
| HC-MBL_16 | PMN    | chr2 | 190956304 | 190956304 | A    | C                | MSTN(dist=28849),C2orf88(dist=46182)         | intergenic | 0.2  | 10 |
| HC-MBL_4  | HC-MBL | chr2 | 190956304 | 190956304 | A    | C                | MSTN(dist=28849),C2orf88(dist=46182)         | intergenic | 0.15 | 20 |
| HC-MBL_17 | PMN    | chr2 | 190956305 | 190956305 | C    | A                | MSTN(dist=28850),C2orf88(dist=46181)         | intergenic | 0.2  | 10 |
| HC-MBL_4  | HC-MBL | chr2 | 190956305 | 190956305 | C    | A                | MSTN(dist=28850),C2orf88(dist=46181)         | intergenic | 0.15 | 20 |
| HC-MBL_18 | PMN    | chr2 | 190956308 | 190956311 | TTTT | -                | MSTN(dist=28853),C2orf88(dist=46175)         | intergenic | 0.2  | 10 |
| HC-MBL_4  | HC-MBL | chr2 | 190956308 | 190956311 | TTTT | -                | MSTN(dist=28853),C2orf88(dist=46175)         | intergenic | 0.15 | 20 |
| HC-MBL_19 | PMN    | chr2 | 190956312 | 190956312 | A    | C                | MSTN(dist=28857),C2orf88(dist=46174)         | intergenic | 0.2  | 10 |
| HC-MBL_4  | HC-MBL | chr2 | 190956312 | 190956312 | A    | C                | MSTN(dist=28857),C2orf88(dist=46174)         | intergenic | 0.15 | 20 |
| HC-MBL_20 | PMN    | chr2 | 190956314 | 190956314 | G    | C                | MSTN(dist=28859),C2orf88(dist=46172)         | intergenic | 0.2  | 10 |
| HC-MBL_4  | HC-MBL | chr2 | 190956314 | 190956314 | G    | C                | MSTN(dist=28859),C2orf88(dist=46172)         | intergenic | 0.15 | 20 |
| HC-MBL_5  | LC-MBL | chr2 | 235777171 | 235777171 | C    | G                | ARL4C(dist=371478),SH3BP4(dist=83457)        | intergenic | 0.28 | 21 |
| HC-MBL_5  | PMN    | chr2 | 235777171 | 235777171 | C    | G                | ARL4C(dist=371478),SH3BP4(dist=83457)        | intergenic | 0.28 | 25 |
| HC-MBL_5  | LC-MBL | chr2 | 235777173 | 235777173 | T    | G                | ARL4C(dist=371480),SH3BP4(dist=83455)        | intergenic | 0.28 | 21 |
| HC-MBL_5  | PMN    | chr2 | 235777173 | 235777173 | T    | G                | ARL4C(dist=371480),SH3BP4(dist=83455)        | intergenic | 0.28 | 25 |
| HC-MBL_3  | HC-MBL | chr1 | 246235199 | 246235199 | T    | -                | SMYD3                                        | intronic   | 0.49 | 93 |
| HC-MBL_3  | PMN    | chr1 | 246235199 | 246235199 | T    | -                | SMYD3                                        | intronic   | 0.35 | 70 |

**Table S13.** Shared recurrent mutations between MBL/CLL samples and their respective PMN samples.

| Sample ID | Entity | Chr | Start     | End       | Ref_base | Var_base                   | Gene                                 | Type       | VAF  | dbSNP_id    |
|-----------|--------|-----|-----------|-----------|----------|----------------------------|--------------------------------------|------------|------|-------------|
| HC-MBL_2  | HC-MBL | 3   | 45121897  | 45121897  | G        | A                          | CLEC3B(dist=44334),CDCP1(dist=1872)  | intergenic | 0.22 | rs192693541 |
| HC-MBL_4  | HC-MBL | 3   | 45121897  | 45121897  | G        | A                          | CLEC3B(dist=44334),CDCP1(dist=1872)  | intergenic | 0.26 | rs192693541 |
| HC-MBL_1  | HC-MBL | 4   | 26287660  | 26287660  | -        | CTGCAGTGCCTATGATCGTGCCA    | SMIM20(dist=356159),RBPJ(dist=33672) | intergenic | 0.59 | -           |
| LC-MBL_3  | LC-MBL | 4   | 26287660  | 26287660  | -        | CTGCAGTGCCTATGATCGTGCCA    | SMIM20(dist=356159),RBPJ(dist=33672) | intergenic | 0.61 | -           |
| LC-MBL_5  | LC-MBL | 2   | 233920626 | 233920626 | -        | GATGGCTG                   | NEU2(dist=20859),INPP5D(dist=4410)   | intergenic | 0.69 | -           |
| LC-MBL_6  | LC-MBL | 2   | 233920626 | 233920626 | -        | GATGGCTG                   | NEU2(dist=20859),INPP5D(dist=4410)   | intergenic | 0.64 | -           |
| HC-MBL_3  | HC-MBL | 6   | 54074925  | 54074925  | -        | CACCTCACCT                 | MLIP                                 | intronic   | 0.24 | -           |
| LC-MBL_3  | LC-MBL | 6   | 54074925  | 54074925  | -        | CACCTCACCT                 | MLIP                                 | intronic   | 0.29 | -           |
| HC-MBL_2  | HC-MBL | 21  | 44415639  | 44415639  | -        | TAGCCAGGTATGGTGGCATGTGCCTA | PKNOX1                               | intronic   | 0.17 | -           |
| LC-MBL_3  | LC-MBL | 21  | 44415639  | 44415639  | -        | TAGCCAGGTATGGTGGCATGTGCCTA | PKNOX1                               | intronic   | 0.19 | -           |
| HC-MBL_2  | HC-MBL | 4   | 153579774 | 153579774 | -        | CTAAAAATACAAAATTTTAGCTTTA  | TMEM154                              | intronic   | 0.25 | rs143753374 |
| LC-MBL_5  | LC-MBL | 4   | 153579774 | 153579774 | -        | CTAAAAATACAAAATTTTAGCTTTA  | TMEM154                              | intronic   | 0.13 | rs143753374 |

**Table S14.** Allele specific primers for the 11 cases with available material.

| Primer Name  | Primer sequence      | Type    | Length | Tm    | GC%   | Self complementarity | Self 3' complementarity |
|--------------|----------------------|---------|--------|-------|-------|----------------------|-------------------------|
| HC-MBL_1-For | GCTGGAGTGAGGAAGCCTG  | Forward | 19     | 60.08 | 63.16 | 3.00                 | 1.00                    |
| HC-MBL_1-Rev | CCCAGGGGTGCAACCAGT   | Reverse | 18     | 60.93 | 66.67 | 6.00                 | 2.00                    |
| HC-MBL_3-For | TGGGGCTGAAGTGAAGAAGC | Forward | 20     | 60.25 | 55.00 | 3.00                 | 2.00                    |
| HC-MBL_3-Rev | CCCTGGCCCCAGTAGTCAAT | Reverse | 20     | 61.28 | 60.00 | 6.00                 | 2.00                    |
| HC-MBL_4-For | GAAGTGCAGCTGGTGGAGTC | Forward | 20     | 60.95 | 60.00 | 6.00                 | 3.00                    |
| HC-MBL_4-Rev | GAGACGGTGACCTGGGTTC  | Reverse | 19     | 59.71 | 63.16 | 5.00                 | 2.00                    |
| CLL_1-For    | TTCAGCTGTCGGAGTCTGGG | Forward | 20     | 61.54 | 60.00 | 6.00                 | 1.00                    |
| CLL_1-Rev    | GAGACGGTGACCAGGGTTC  | Reverse | 19     | 59.71 | 63.16 | 5.00                 | 2.00                    |
| CLL_2-For    | ACTGGTGAAGCCTTCGGAGA | Forward | 20     | 60.83 | 55.00 | 7.00                 | 2.00                    |
| CLL_2-Rev    | CCTGGCCCCAAAAGTCAAAG | Reverse | 20     | 59.32 | 55.00 | 4.00                 | 0.00                    |
| CLL_4-For    | CCTGTGCAGCGTCTGGATT  | Forward | 19     | 60.38 | 57.89 | 4.00                 | 1.00                    |
| CLL_4-Rev    | GCCCCAGACGTCCATATCGT | Reverse | 20     | 61.75 | 60.00 | 6.00                 | 2.00                    |
| CLL_5-For    | GAAGTGCAGCTGGTGGAGTC | Forward | 20     | 60.95 | 60.00 | 6.00                 | 3.00                    |
| CLL_5-Rev    | CTGGCCCCAGTAGTCAACAC | Reverse | 20     | 60.32 | 60.00 | 6.00                 | 2.00                    |
| LC-MBL_1-For | AGATGCAACTGCAGGGGTC  | Forward | 19     | 60.0  | 57.89 | 6.00                 | 2.00                    |
| LC-MBL_1-Rev | CCCAGACGTCCATACCGTAG | Reverse | 20     | 59.33 | 60.00 | 6.00                 | 3.00                    |
| LC-MBL_4-For | AAGGTCTCCTGCAAGGCTTC | Forward | 20     | 59.96 | 55.00 | 5.00                 | 3.00                    |
| LC-MBL_4-Rev | GAGACGGTGACCAGGGTTCC | Reverse | 20     | 62.17 | 65.00 | 5.00                 | 2.00                    |
| LC-MBL_5-For | CAGAGGTGAAAAAGCCCGGA | Forward | 20     | 60.25 | 55.00 | 4.00                 | 2.00                    |
| LC-MBL_5-Rev | CTGAAGAGACGGTGACCAGG | Reverse | 20     | 59.76 | 60.00 | 5.00                 | 3.00                    |
| LC-MBL_6-For | TGGTCCTACGCTGGTGAAC  | Forward | 20     | 59.97 | 55.00 | 3.00                 | 1.00                    |
| LC-MBL_6-Rev | GAGACGGTGACCAGGGTTC  | Reverse | 19     | 59.71 | 63.16 | 5.00                 | 2.00                    |



**Table S15.** Genomic aberrations detected in the present cohort by CNA analysis of WGS data.

| Sample   | Entity | chr | Band               | Position    | chr size  | start     | end       | BP size  | copy number | status |
|----------|--------|-----|--------------------|-------------|-----------|-----------|-----------|----------|-------------|--------|
| CLL_1    | CLL    | 13  | <b>q14.2</b>       | q-middle    | 115169878 | 50500000  | 50600000  | 100000   | 1           | loss   |
| CLL_4    | CLL    | 2   | p11.1              | centromeric | 243199373 | 92250000  | 92350000  | 100000   | 1           | loss   |
| CLL_4    | CLL    | 4   | p11                | centromeric | 191154276 | 49050000  | 49200000  | 150000   | 1           | loss   |
| CLL_4    | CLL    | 4   | p11                | centromeric | 191154276 | 49600000  | 49700000  | 100000   | 1           | loss   |
| CLL_5    | CLL    | 13  | <b>q14.2</b>       | q-middle    | 115169878 | 50450000  | 50650000  | 200000   | 1           | loss   |
| HC-MBL_1 | HC-MBL | 13  | <b>q14.2-q14.3</b> | q-middle    | 115169878 | 48400000  | 52100000  | 3700000  | 1           | loss   |
| HC-MBL_2 | HC-MBL | 13  | <b>q14.2-q14.3</b> | q-middle    | 115169878 | 50350000  | 51650000  | 1300000  | 1           | loss   |
| HC-MBL_3 | HC-MBL | 9   | q13                | q-arm       | 141213431 | 66200000  | 66300000  | 100000   | 1           | loss   |
| HC-MBL_3 | HC-MBL | 13  | <b>q14.2-q14.3</b> | q-middle    | 115169878 | 49000000  | 53400000  | 4400000  | 1           | loss   |
| LC-MBL_2 | LC-MBL | 6   | p21.32             | p-middle    | 171115067 | 32650000  | 32750000  | 100000   | 1           | loss   |
| LC-MBL_5 | LC-MBL | 3   | q29                | q-end       | 198022430 | 195450000 | 195550000 | 100000   | 1           | loss   |
| LC-MBL_5 | LC-MBL | 8   | p11.22             | centromeric | 146364022 | 39250000  | 39350000  | 100000   | 1           | loss   |
| LC-MBL_5 | LC-MBL | 12  | q24.33             | q-end       | 133851895 | 132600000 | 133450000 | 850000   | 3           | gain   |
| LC-MBL_5 | LC-MBL | 13  | <b>q14.2-q14.3</b> | q-middle    | 115169878 | 49900000  | 51600000  | 1700000  | 1           | loss   |
| LC-MBL_5 | LC-MBL | 15  | q21.2              | q-middle    | 102531392 | 52250000  | 52650000  | 400000   | 1           | loss   |
| LC-MBL_6 | LC-MBL | 13  | <b>q14.2-q31.1</b> | q-middle    | 115169878 | 48250000  | 80800000  | 32550000 | 1           | loss   |

**Table S16.** Common genomic aberrations in CLL that were also identified in the present study by the analysis of WGS data and FISH.

| Lab Sample ID | Entity | WGS identified CNAs | FISH results |               |          |          |
|---------------|--------|---------------------|--------------|---------------|----------|----------|
|               |        |                     | del(13q)     | trisomy 12    | del(11q) | del(17p) |
| CLL_1         | CLL    | del(13q)            | +            | -             | -        | -        |
| CLL_2         | CLL    | not available       | +            | -             | -        | -        |
| CLL_3         | CLL    | not available       | +            | -             | -        | -        |
| CLL_4         | CLL    | -                   | -            | -             | -        | -        |
| CLL_5         | CLL    | del(13q)            |              | not available |          |          |
| HC-MBL_1      | HC-MBL | del(13q)            | +            | -             | -        | -        |
| HC-MBL_2      | HC-MBL | del(13q)            | +            | -             | -        | -        |
| HC-MBL_3      | HC-MBL | del(13q)            | +            | -             | -        | -        |
| HC-MBL_4      | HC-MBL | not available       |              | not available |          |          |
| HC-MBL_5      | HC-MBL | not available       | -            | -             | -        | -        |
| LC-MBL_1      | LC-MBL | -                   |              | not available |          |          |
| LC-MBL_2      | LC-MBL | -                   | +            | -             | -        | -        |
| LC-MBL_3      | LC-MBL | not available       | -            | -             | -        | -        |
| LC-MBL_4      | LC-MBL | not available       |              | not available |          |          |
| LC-MBL_5      | LC-MBL | del(13q)            |              | not available |          |          |
| LC-MBL_6      | LC-MBL | del(13q)            | +            | -             | -        | -        |

## Supplementary figures

**Figure S1.** Coding and non-coding regions enriched for mutations. Mutational enrichment was observed in the IG loci and within gene sites known to be recurrently affected by off-target somatic hypermutation (e.g. *BTG2*, *BCL6* and *TCL1A*).

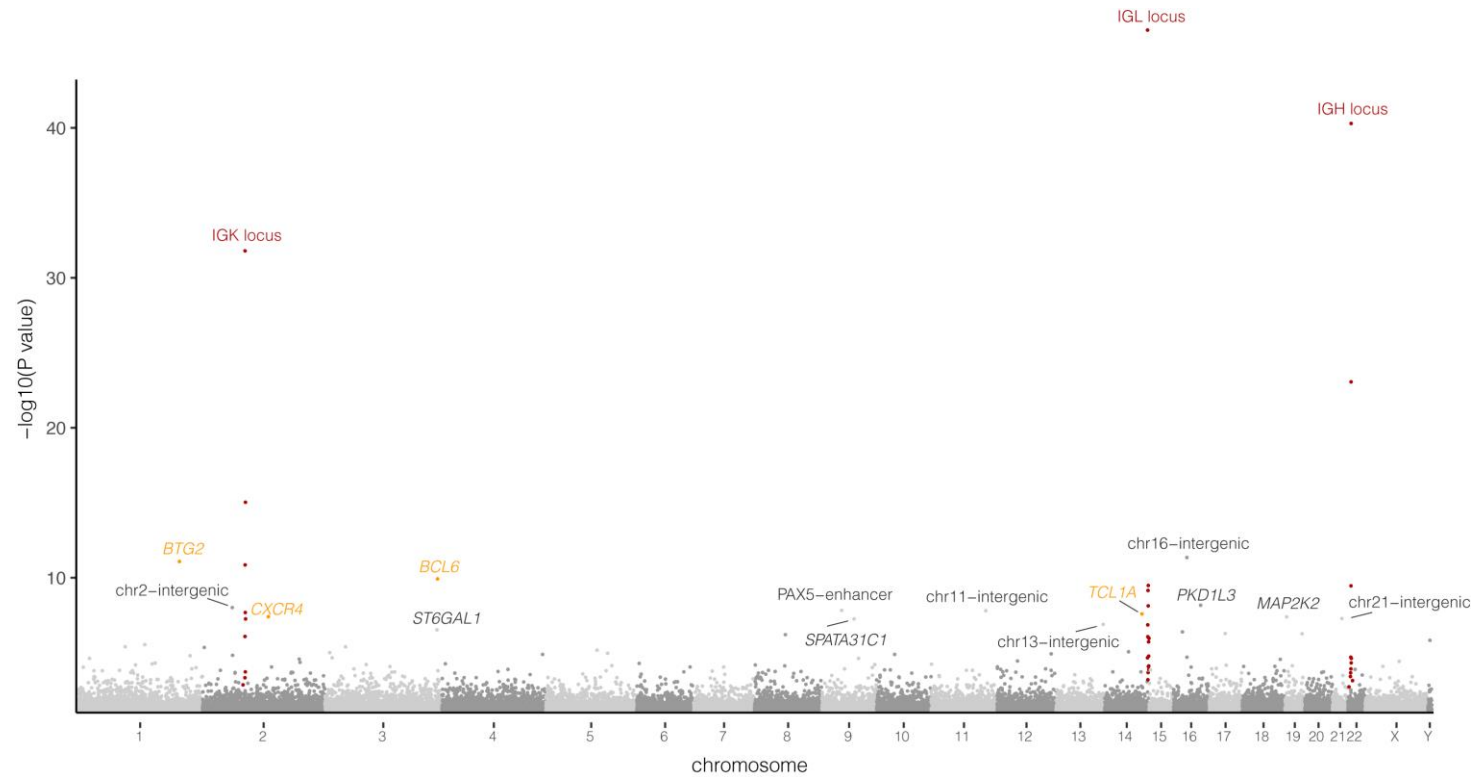

Supplement: 2017.177212.AGATHANGELIDIS_SUPPL.pdf [file 2017.177212.AGATHANGELIDIS_SUPPL.pdf]
