# Supplementary material for: Highly similar genomic landscapes in monoclonal B-cell lymphocytosis and ultra-stable chronic lymphocytic leukemia with low frequency of driver mutations
Source: PubMed Central journal article supplement — Haematologica. 2018 Feb 15;103(5):865–73. doi: 10.3324/haematol.2017.177212 (PMC5927998; doi:10.3324/haematol.2017.177212), 2018-05
Supplement: 2017_177212-Disclosures_and_Contributions.pdf [file 2017_177212-Disclosures_and_Contributions.pdf]

Haematologica  
HAEMATOL/2017/177212  
Version 3

Highly similar genomic landscapes in monoclonal B-cell lymphocytosis  
and ultra-stable chronic lymphocytic leukemia with low frequency of  
driver mutations

Andreas Agathangelidis, Viktor Ljungström, Lydia Scarfò, Claudia Fazi,  
Maria Gounari, Tatjana Pandzic, Lesley-Ann Sutton, Kostas  
Stamatopoulos, Giovanni Tonon, Richard Rosenquist, and Paolo Ghia

Disclosures: none

Contributions: A.A. performed the experiments, analysed the data and wrote the manuscript. V.L. performed the experiments, analysed the data and wrote the manuscript. L.S. collected and processed patient samples and edited the manuscript. C.F. performed experiments and edited the manuscript. MG analysed the data and edited the manuscript. T.P. performed experiments and edited the manuscript. L-A.S. performed experiments and edited the manuscript. K.S. provided valuable insight and wrote the manuscript. G.T. provided valuable insight and edited the manuscript. R.R. directed the study and wrote the manuscript. P.G. conceived and directed the study and wrote the manuscript.
