# Supplementary material for: Highly similar genomic landscapes in monoclonal B-cell lymphocytosis and ultra-stable chronic lymphocytic leukemia with low frequency of driver mutations
Source: PubMed Central journal article supplement — Haematologica. 2018 Feb 15;103(5):865–73. doi: 10.3324/haematol.2017.177212 (PMC5927998; doi:10.3324/haematol.2017.177212), 2018-05
Supplement: HAEMATOL-2017-177212v3-Agathangelidis_v2-01.pdf [file HAEMATOL-2017-177212v3-Agathangelidis_v2-01.pdf]

# Insight into the genetic lesions involved in the transformation from MBL to CLL, analyzing for the first time low-count MBL cases, using whole-genome sequencing and targeted re-sequencing

## Model for progression from Monoclonal B-cell Lymphocytosis (MBL) to Chronic Lymphocytic Leukemia (CLL)

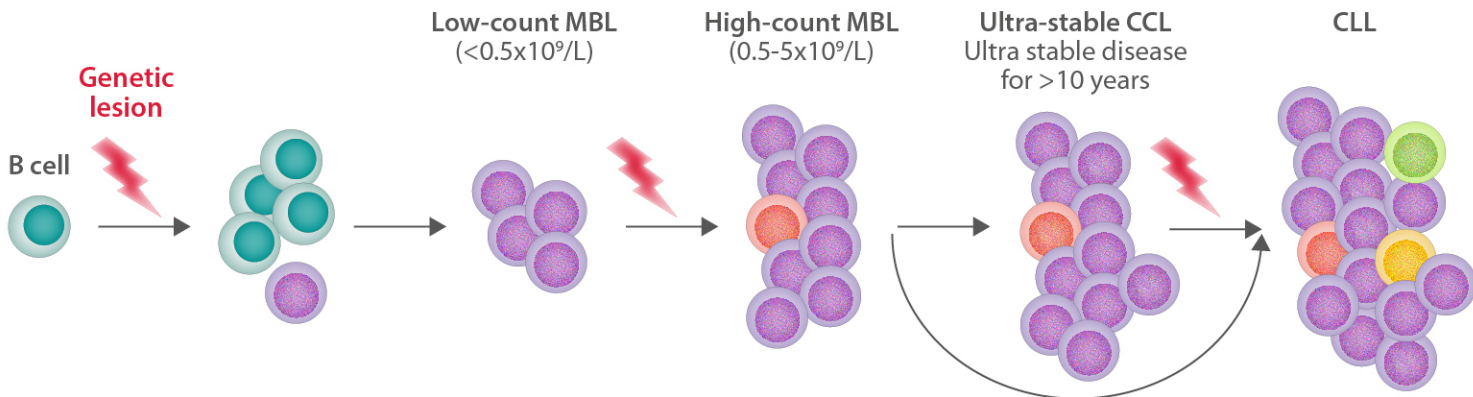

**6** Low-count MBL

**5** High-count MBL

**5** Ultra-stable CLL

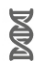

Whole genome sequencing and targeted re-sequencing

Somatic variants  
(tot: 37,033)

Analogous mutation  
rates

Non-synonymous  
exonic variants

Missense  
variants

**Low-count MBL** 2,040 (range: 298-2871) 0.63 mutations per Mb 8.9 (range: 1-16) 47/53 (88.7%)

**High-count MBL** 2,558 (range: 1428-3483) 0.79 mutations per Mb 14.8 (range: 9-27) 61/73 (83.7%)

**Ultra-stable CLL** 2,400 (range: 1650-3176) 0.74 mutations per Mb 11.6 (range: 7-19) 50/59 (84.7%)
